# Supplementary material for: The Molecular and Neuropathological Consequences of Genetic Risk for Alzheimer's Dementia
Source: PubMed Central journal article supplement (PMC6187226; doi:10.3389/fnins.2018.00699), 2018-10-08
Supplement: Data_Sheet_1.pdf [file Data_Sheet_1.pdf]

**Title:** The molecular and neuropathological consequences of genetic risk for Alzheimer's dementia

**Authors:** Shinya Tasaki<sup>1,2</sup>, Chris Gaiteri<sup>1,2</sup>, Sara Mostafavi<sup>3</sup>, Philip L. De Jager<sup>4,5</sup>, David A. Bennett<sup>1,2</sup>

**Affiliations:**

1 Rush Alzheimer's Disease Center, Rush University Medical Center, Chicago IL

2 Department of Neurological Sciences, Rush University Medical Center, Chicago, IL, USA

3 Department of Statistics, Department of Medical Genetics, University of British Columbia, Vancouver, BC, Canada

4 Center for Translational & Computational Neuroimmunology, Department of Neurology, Columbia University Medical Center, New York, NY, USA

5 Cell Circuits program, Broad Institute, Cambridge, Massachusetts, USA

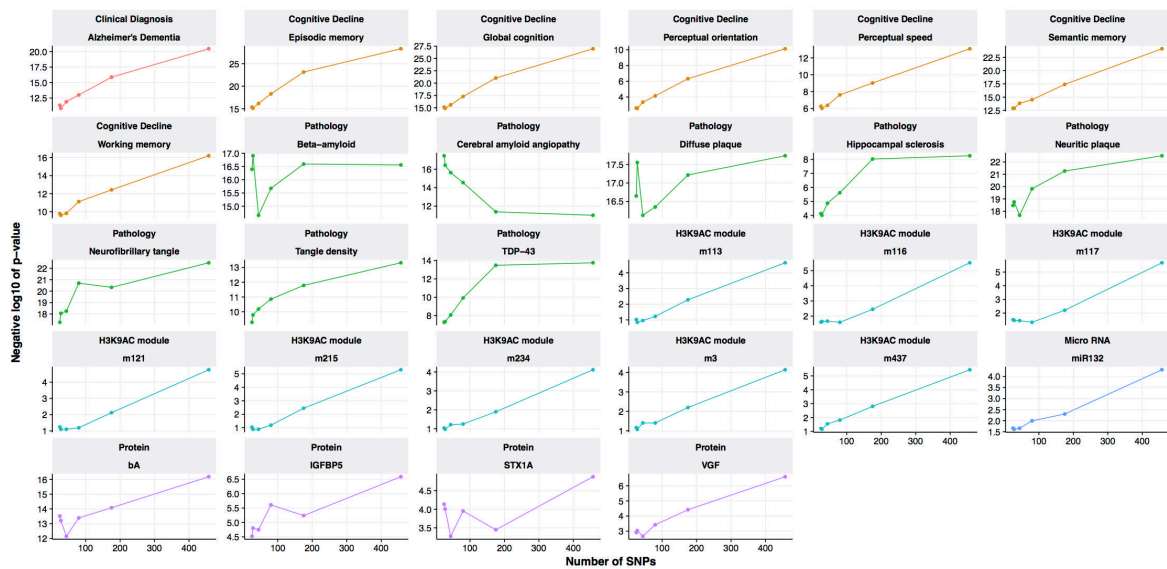

Supplementary Figure 1. Polygenic trend of AD-PRS-associated traits.

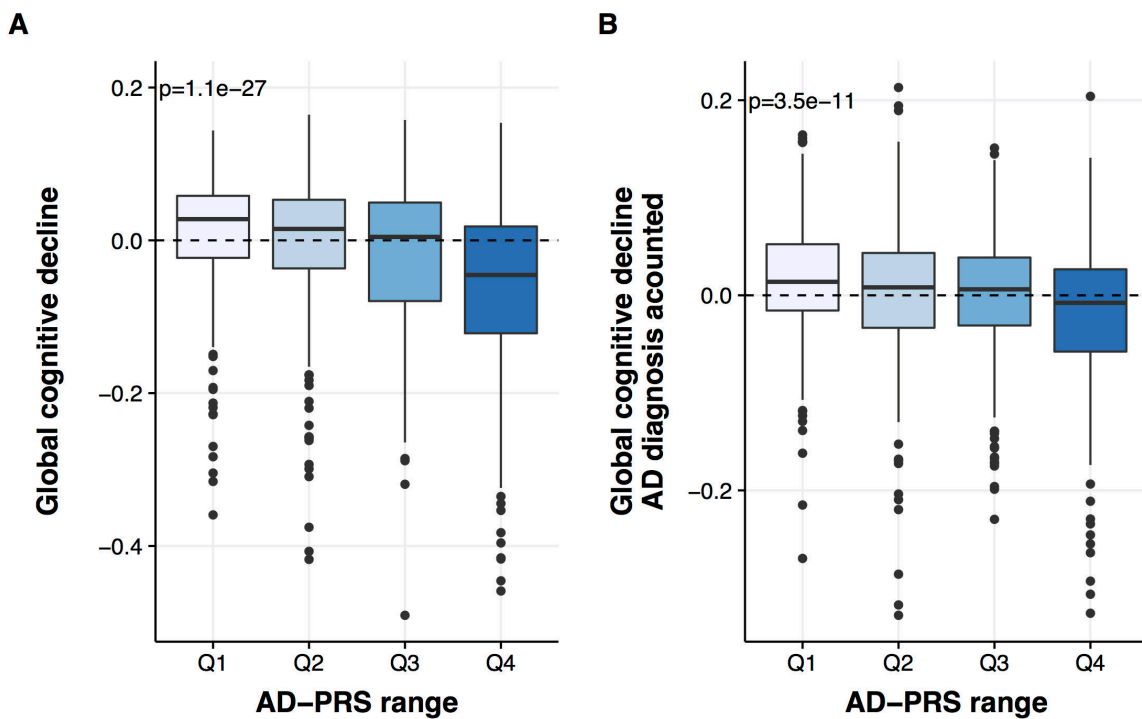

Supplementary Figure 2. Association of AD-PRS with global cognitive decline. (A) Global cognitive decline of individuals with different range of AD-PRS. ROS/MAP

participants were separated into four groups based on quantiles of AD-PRS. (B) Global cognitive decline of individuals with different range of AD-PRS with adjusting AD diagnosis.

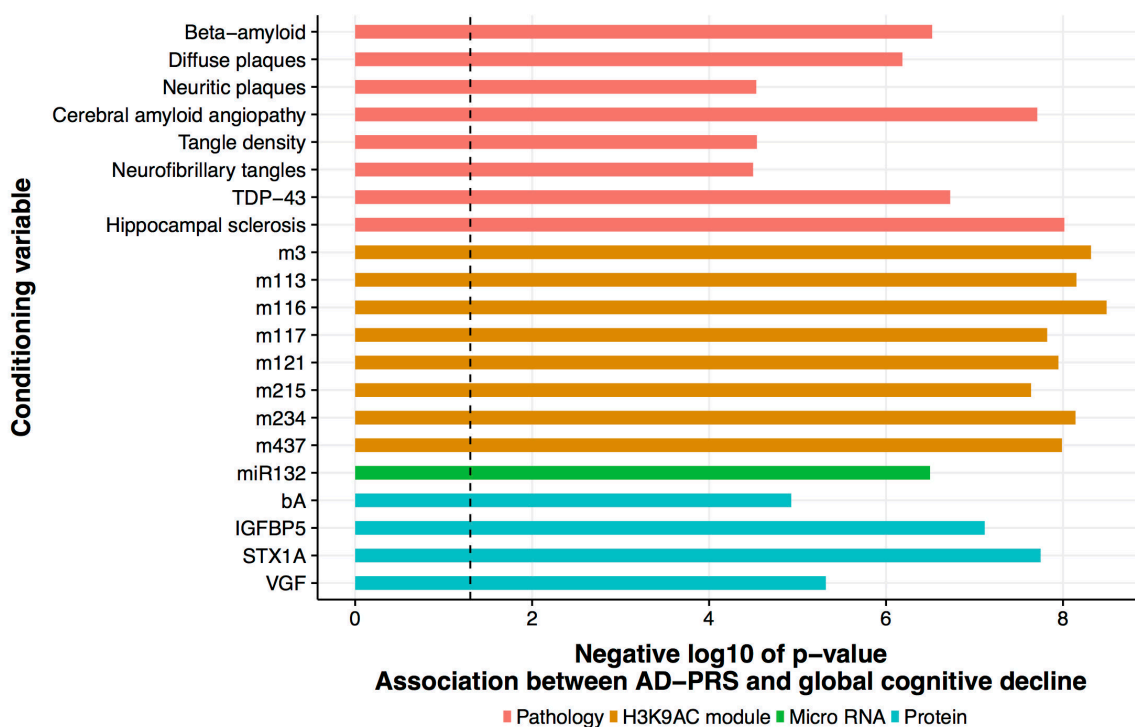

Supplementary Figure 3. Association between AD-PRS and global cognitive decline given an endophenotype. A bar plot represent p-values for association of AD-PRS with global cognitive decline given each endophenotype.

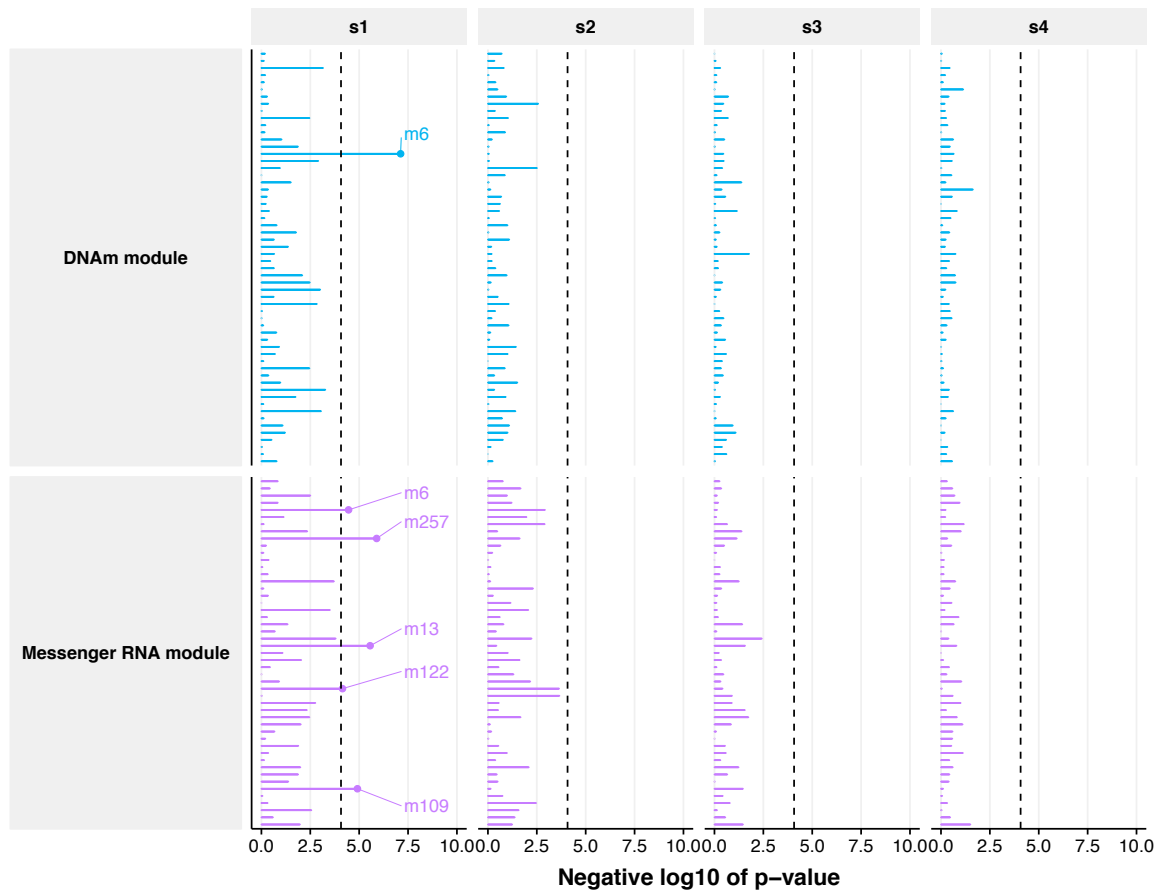

Supplementary Figure 4. Association of AD-PRS based on each SNP group with DNAm modules and mRNA modules. A dash line represents significance threshold that is identical to one in Figure 1.

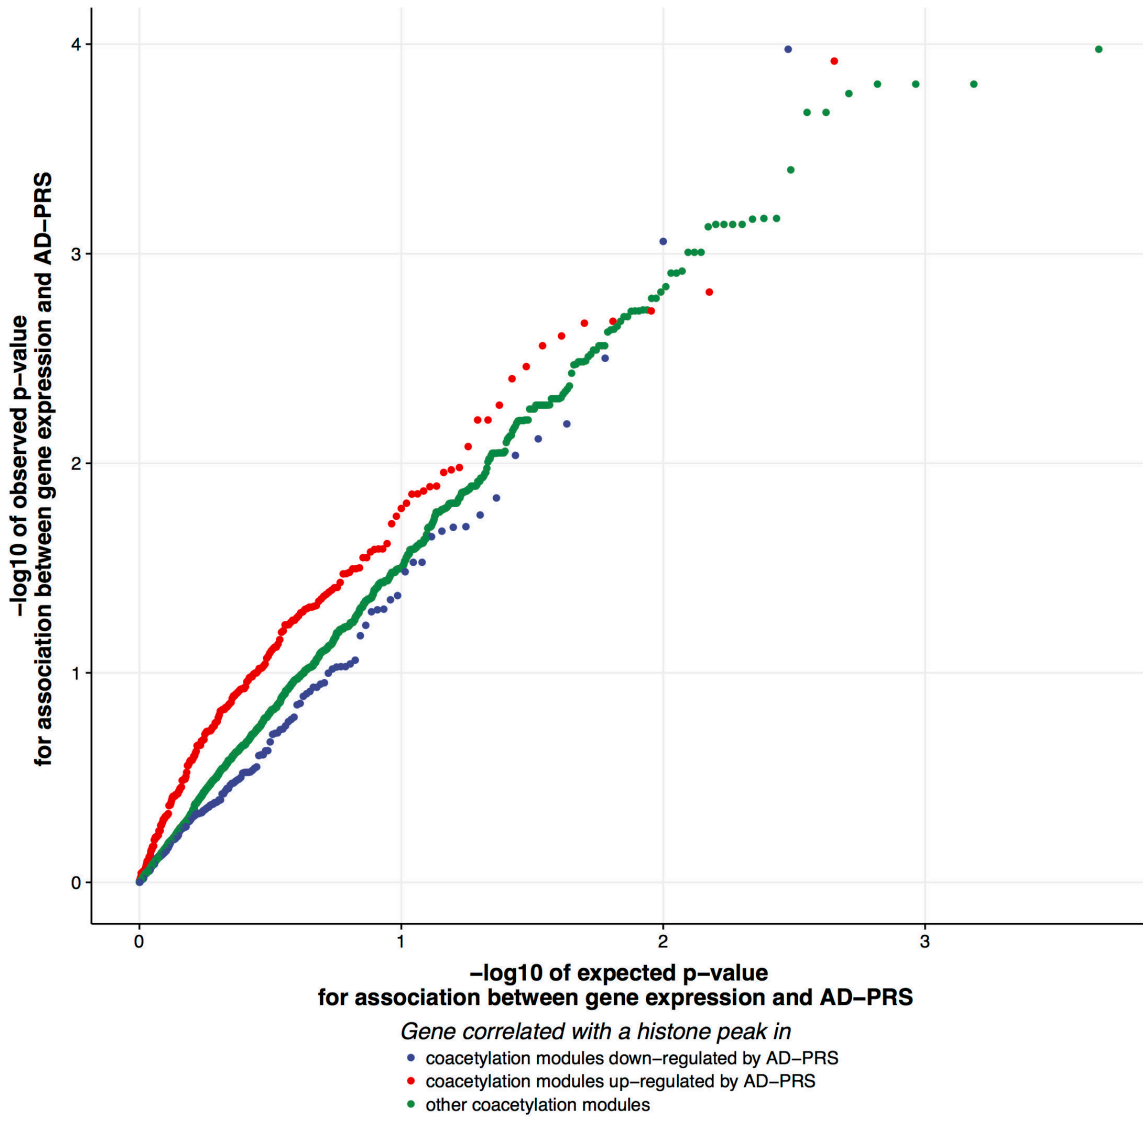

Supplementary Figure 5. Quantile-quantile plot for association of AD-PRS with gene expression grouped by associated eQTHs.
