# Supplementary material for: The Molecular and Neuropathological Consequences of Genetic Risk for Alzheimer's Dementia
Source: Front Neurosci. 2018 Oct 8;12:699. doi: 10.3389/fnins.2018.00699 (PMC6187226; doi:10.3389/fnins.2018.00699)
Supplement: Supplementary file 3 [file Table_3.xlsx]

## Sheet: DNA methylation module
Supplementary Table3: Module identity
module	chr	start	end	type
m1	chr1	864879	865013	Shelf
m1	chr1	871980	872737	Shore
m1	chr1	874697	875345	Shore
m1	chr1	892857	894257	Shore
m1	chr1	967967	970237	Island
m1	chr1	1026410	1026410	Island
m1	chr1	1232482	1233542	Shelf
m1	chr1	1234354	1235430	OpenSea
m1	chr1	1356565	1357361	Shore
m1	chr1	1471938	1472146	Shore
m1	chr1	1486459	1487445	Shelf
m1	chr1	1492513	1492513	Shelf
m1	chr1	1507138	1507138	Shelf
m1	chr1	1562110	1562397	Island
m1	chr1	1914597	1914707	Shore
m1	chr1	1951514	1953419	Shore
m1	chr1	2006032	2006896	Shore
m1	chr1	2030817	2030817	OpenSea
m1	chr1	2056109	2056109	OpenSea
m1	chr1	2057439	2059086	OpenSea
m1	chr1	2187457	2189027	OpenSea
m1	chr1	2198760	2198879	OpenSea
m1	chr1	2209140	2209957	Shelf
m1	chr1	2234291	2234751	Shore
m1	chr1	2276456	2276565	Island
m1	chr1	2527477	2527502	Island
m1	chr1	3042459	3042459	OpenSea
m1	chr1	3056542	3056771	Island
m1	chr1	3068360	3068360	Shelf
m1	chr1	3077356	3078839	Shelf
m1	chr1	3087637	3090345	OpenSea
m1	chr1	3132458	3132458	OpenSea
m1	chr1	3133763	3136528	OpenSea
m1	chr1	3276413	3277000	Shore
m1	chr1	3277525	3277623	Shelf
m1	chr1	3342013	3342726	Island
m1	chr1	3347457	3348571	Shelf
m1	chr1	3418656	3419426	OpenSea
m1	chr1	3452713	3452713	OpenSea
m1	chr1	3472204	3474376	OpenSea
m1	chr1	3491634	3491634	OpenSea
m1	chr1	3607097	3607425	Island
m1	chr1	3621445	3623102	Shore
m1	chr1	3630882	3630882	Shelf
m1	chr1	3648749	3649250	Shore
m1	chr1	3661862	3662738	Shore
m1	chr1	3700680	3701203	Shelf
m1	chr1	3729131	3729131	Shelf
m1	chr1	3775078	3775334	Island
m1	chr1	3809431	3810632	Shore
m1	chr1	4470956	4472087	OpenSea
m1	chr1	6140589	6140589	OpenSea
m1	chr1	6190318	6190318	Shore
m1	chr1	6202177	6202177	Island
m1	chr1	6246236	6246236	OpenSea
m1	chr1	6333502	6333867	OpenSea
m1	chr1	6363562	6363886	OpenSea
m1	chr1	6384147	6384147	OpenSea
m1	chr1	6411612	6411612	OpenSea
m1	chr1	6565177	6566528	OpenSea
m1	chr1	6698457	6698457	OpenSea
m1	chr1	6870250	6870250	OpenSea
m1	chr1	6927639	6927639	OpenSea
m1	chr1	6999547	6999547	OpenSea
m1	chr1	7024757	7024757	Shelf
m1	chr1	7122541	7122726	Island
m1	chr1	7181893	7181893	OpenSea
m1	chr1	7184587	7184783	OpenSea
m1	chr1	7408018	7409003	OpenSea
m1	chr1	7432644	7432644	OpenSea
m1	chr1	7480005	7480005	OpenSea
m1	chr1	7521150	7521150	OpenSea
m1	chr1	7611041	7611041	OpenSea
m1	chr1	7727380	7728694	Shelf
m1	chr1	7747160	7747160	OpenSea
m1	chr1	7767865	7767865	Shelf
m1	chr1	7778234	7778321	OpenSea
m1	chr1	7816037	7816037	OpenSea
m1	chr1	7829296	7829296	Shelf
m1	chr1	7834809	7834809	Shelf
m1	chr1	8078652	8078652	OpenSea
m1	chr1	8385396	8385396	Shore
m1	chr1	8543012	8543012	OpenSea
m1	chr1	8613145	8613264	OpenSea
m1	chr1	8738385	8738385	OpenSea
m1	chr1	8748155	8748155	OpenSea
m1	chr1	8800647	8800647	OpenSea
m1	chr1	8923969	8923969	OpenSea
m1	chr1	9101465	9101465	Shore
m1	chr1	9307378	9309004	OpenSea
m1	chr1	9371406	9371406	OpenSea
m1	chr1	9377984	9377984	OpenSea
m1	chr1	9382878	9383245	OpenSea
m1	chr1	9635799	9635799	OpenSea
m1	chr1	9965884	9965884	Shelf
m1	chr1	10096904	10096904	Shelf
m1	chr1	10387937	10387937	Shore
m1	chr1	10595970	10595970	OpenSea
m1	chr1	10600222	10600222	OpenSea
m1	chr1	10683577	10684392	OpenSea
m1	chr1	10700647	10701900	Shore
m1	chr1	10702137	10702137	Island
m1	chr1	10758995	10758995	Shore
m1	chr1	10843154	10844072	OpenSea
m1	chr1	10846005	10846092	OpenSea
m1	chr1	10847541	10847594	OpenSea
m1	chr1	11345187	11345187	OpenSea
m1	chr1	11559982	11560374	Shore
m1	chr1	11760709	11761766	OpenSea
m1	chr1	12000521	12000521	OpenSea
m1	chr1	12135707	12135707	OpenSea
m1	chr1	12164477	12164477	OpenSea
m1	chr1	12497013	12497013	OpenSea
m1	chr1	12517834	12517834	OpenSea
m1	chr1	14149815	14149832	OpenSea
m1	chr1	15681735	15681735	OpenSea
m1	chr1	15766930	15766930	OpenSea
m1	chr1	15910166	15910989	Shore
m1	chr1	16053301	16053301	Shore
m1	chr1	16056218	16056218	Shelf
m1	chr1	16087977	16087977	Shelf
m1	chr1	17665930	17665930	OpenSea
m1	chr1	17745990	17745990	Shore
m1	chr1	17750646	17752023	OpenSea
m1	chr1	18015648	18015648	OpenSea
m1	chr1	19054785	19054906	OpenSea
m1	chr1	19232926	19232926	Shelf
m1	chr1	19267827	19267827	OpenSea
m1	chr1	19574023	19574023	Shelf
m1	chr1	20113930	20113930	OpenSea
m1	chr1	20515978	20515978	Shelf
m1	chr1	20826246	20826246	OpenSea
m1	chr1	20834995	20835335	Shore
m1	chr1	20990821	20990821	Shelf
m1	chr1	21966310	21966500	OpenSea
m1	chr1	22069417	22069417	OpenSea
m1	chr1	22106295	22106295	Shelf
m1	chr1	22153389	22153389	Shore
m1	chr1	22355055	22355055	Shelf
m1	chr1	22777266	22777839	Shore
m1	chr1	23350054	23350054	Shelf
m1	chr1	23450795	23450795	OpenSea
m1	chr1	23953152	23953778	OpenSea
m1	chr1	24191740	24192033	Shelf
m1	chr1	24469564	24470205	OpenSea
m1	chr1	24744118	24744118	Shore
m1	chr1	24833311	24833311	Shelf
m1	chr1	24972744	24972744	Shelf
m1	chr1	24979088	24979088	OpenSea
m1	chr1	24995933	24995933	OpenSea
m1	chr1	25232337	25232337	Shelf
m1	chr1	25254088	25255314	Shore
m1	chr1	25988486	25988486	OpenSea
m1	chr1	26195345	26195345	OpenSea
m1	chr1	26564986	26564986	Shelf
m1	chr1	26661686	26661686	Shore
m1	chr1	27175203	27175203	OpenSea
m1	chr1	27284253	27285663	Shore
m1	chr1	27893886	27893925	Shore
m1	chr1	27994728	27994978	Island
m1	chr1	28177053	28177053	OpenSea
m1	chr1	28239160	28239160	Shore
m1	chr1	28857399	28857538	Shore
m1	chr1	28966889	28966889	Shelf
m1	chr1	29188362	29188362	Shore
m1	chr1	29584023	29585853	Shore
m1	chr1	29589154	29589154	Shore
m1	chr1	31196412	31196527	Shore
m1	chr1	31367595	31367595	OpenSea
m1	chr1	32160527	32160527	OpenSea
m1	chr1	32167512	32167512	Shelf
m1	chr1	32169274	32169274	Shore
m1	chr1	32195460	32195460	OpenSea
m1	chr1	32219777	32219777	Shelf
m1	chr1	32220189	32220996	Shore
m1	chr1	32221888	32221978	Island
m1	chr1	32478224	32478440	Shore
m1	chr1	32509371	32509371	OpenSea
m1	chr1	32691278	32691278	Shelf
m1	chr1	32741619	32742037	Shore
m1	chr1	32826969	32828016	Island
m1	chr1	33321772	33321772	OpenSea
m1	chr1	33635646	33635646	OpenSea
m1	chr1	35494855	35494855	Shelf
m1	chr1	35549012	35549012	Shelf
m1	chr1	35569491	35569491	OpenSea
m1	chr1	35581062	35581062	OpenSea
m1	chr1	35738702	35738702	Shelf
m1	chr1	35873695	35873695	OpenSea
m1	chr1	36026194	36026611	Shelf
m1	chr1	36038468	36038877	Shore
m1	chr1	36068791	36068791	OpenSea
m1	chr1	36105569	36105569	Shore
m1	chr1	36231895	36231895	Shelf
m1	chr1	36692491	36692491	Shelf
m1	chr1	36930185	36931973	Shore
m1	chr1	38002922	38002922	OpenSea
m1	chr1	38005965	38006319	OpenSea
m1	chr1	38010230	38010385	OpenSea
m1	chr1	38023934	38023934	Shore
m1	chr1	38201818	38201818	Shore
m1	chr1	39407387	39408099	OpenSea
m1	chr1	39979401	39979401	Shore
m1	chr1	40037710	40037710	Shelf
m1	chr1	40042727	40043840	Shore
m1	chr1	40103693	40103693	Shore
m1	chr1	40726012	40726012	Shelf
m1	chr1	40768026	40768026	Shore
m1	chr1	40771135	40771135	Shore
m1	chr1	40779132	40780905	Shore
m1	chr1	40782458	40783060	Island
m1	chr1	40922773	40922773	OpenSea
m1	chr1	41001235	41001235	Shelf
m1	chr1	41091703	41091703	OpenSea
m1	chr1	41980863	41981735	Shore
m1	chr1	42664858	42664858	OpenSea
m1	chr1	42794262	42794262	OpenSea
m1	chr1	42848996	42848996	Shelf
m1	chr1	42886004	42886004	OpenSea
m1	chr1	42911814	42911814	OpenSea
m1	chr1	43031887	43031887	OpenSea
m1	chr1	43283119	43283884	Shore
m1	chr1	43419475	43419475	Shelf
m1	chr1	43617187	43617187	Shelf
m1	chr1	43736600	43736600	Shore
m1	chr1	43788427	43788427	OpenSea
m1	chr1	43819313	43819313	OpenSea
m1	chr1	43859682	43859682	Shelf
m1	chr1	44000558	44000558	Shelf
m1	chr1	44067587	44068818	Shelf
m1	chr1	44126005	44126005	OpenSea
m1	chr1	44240621	44240621	OpenSea
m1	chr1	44396475	44396475	Shelf
m1	chr1	44458001	44458001	Shore
m1	chr1	44466601	44466601	OpenSea
m1	chr1	44482420	44483623	OpenSea
m1	chr1	44991042	44991042	OpenSea
m1	chr1	45082704	45082704	Shore
m1	chr1	45082840	45083278	Island
m1	chr1	45111435	45111435	OpenSea
m1	chr1	45116008	45116008	OpenSea
m1	chr1	45116241	45117290	Shelf
m1	chr1	45278971	45279638	Island
m1	chr1	45308248	45308298	Shore
m1	chr1	46196138	46196138	OpenSea
m1	chr1	46212773	46212773	Shelf
m1	chr1	46267883	46268979	Shore
m1	chr1	46273758	46273758	Shelf
m1	chr1	46485352	46485352	OpenSea
m1	chr1	46763858	46763858	Shelf
m1	chr1	47366366	47366366	OpenSea
m1	chr1	47775801	47775801	Shelf
m1	chr1	47842729	47842729	OpenSea
m1	chr1	51166032	51166032	OpenSea
m1	chr1	51185450	51185450	OpenSea
m1	chr1	51312091	51312119	OpenSea
m1	chr1	51793660	51793660	Shelf
m1	chr1	51794136	51796003	Shore
m1	chr1	51822535	51822535	OpenSea
m1	chr1	52108201	52108201	OpenSea
m1	chr1	52155720	52155720	OpenSea
m1	chr1	52301876	52302803	OpenSea
m1	chr1	52388141	52388141	OpenSea
m1	chr1	52718499	52718499	OpenSea
m1	chr1	53238265	53238307	OpenSea
m1	chr1	53342353	53343261	OpenSea
m1	chr1	53606574	53606574	OpenSea
m1	chr1	53679725	53679995	OpenSea
m1	chr1	53770959	53770959	OpenSea
m1	chr1	53794150	53795111	Shore
m1	chr1	53905612	53906948	Shore
m1	chr1	54238032	54238032	OpenSea
m1	chr1	54302681	54302681	Shore
m1	chr1	54831653	54831653	OpenSea
m1	chr1	55015139	55015139	OpenSea
m1	chr1	55274185	55274185	Shelf
m1	chr1	55450605	55450605	Shelf
m1	chr1	55669992	55669992	OpenSea
m1	chr1	57892830	57892830	Shelf
m1	chr1	58063953	58063953	OpenSea
m1	chr1	58324995	58325449	OpenSea
m1	chr1	58460380	58460380	OpenSea
m1	chr1	59165508	59166369	OpenSea
m1	chr1	59609170	59609170	Shelf
m1	chr1	59920114	59920114	OpenSea
m1	chr1	59948108	59948108	OpenSea
m1	chr1	60284695	60284695	Shelf
m1	chr1	61715231	61715231	OpenSea
m1	chr1	61843430	61843430	OpenSea
m1	chr1	62211713	62211713	Shelf
m1	chr1	62270278	62270278	OpenSea
m1	chr1	62512893	62512893	OpenSea
m1	chr1	62524319	62524319	OpenSea
m1	chr1	62907616	62907616	Shelf
m1	chr1	63142359	63142359	OpenSea
m1	chr1	63837190	63837190	Shelf
m1	chr1	63906933	63906933	OpenSea
m1	chr1	64002834	64002834	OpenSea
m1	chr1	64014340	64014796	OpenSea
m1	chr1	64264863	64264863	OpenSea
m1	chr1	64300033	64300033	OpenSea
m1	chr1	64301568	64301568	OpenSea
m1	chr1	64413782	64413782	OpenSea
m1	chr1	64596822	64596822	OpenSea
m1	chr1	64613258	64613258	OpenSea
m1	chr1	65414209	65414209	OpenSea
m1	chr1	65876392	65876392	OpenSea
m1	chr1	66723177	66723177	OpenSea
m1	chr1	66999304	66999929	Shore
m1	chr1	67151389	67151389	OpenSea
m1	chr1	67154905	67154905	OpenSea
m1	chr1	67160132	67160132	OpenSea
m1	chr1	67220432	67220432	Shelf
m1	chr1	67775954	67775954	Shelf
m1	chr1	67798929	67798929	OpenSea
m1	chr1	67815061	67815061	OpenSea
m1	chr1	67855787	67855787	OpenSea
m1	chr1	67897436	67897436	Shore
m1	chr1	68209155	68209155	OpenSea
m1	chr1	68649673	68649673	OpenSea
m1	chr1	68940435	68940435	OpenSea
m1	chr1	70509936	70509936	OpenSea
m1	chr1	70684371	70684371	Shelf
m1	chr1	70691524	70691524	Shelf
m1	chr1	70710389	70710389	OpenSea
m1	chr1	71543274	71543274	Shelf
m1	chr1	74719316	74719316	OpenSea
m1	chr1	75100556	75100556	OpenSea
m1	chr1	76396165	76396165	OpenSea
m1	chr1	76397847	76397847	OpenSea
m1	chr1	76782984	76782984	OpenSea
m1	chr1	76899846	76899846	OpenSea
m1	chr1	76968506	76968506	OpenSea
m1	chr1	77013304	77013304	OpenSea
m1	chr1	77477593	77477593	OpenSea
m1	chr1	77681561	77681561	Shelf
m1	chr1	77956526	77956526	OpenSea
m1	chr1	78001627	78001627	OpenSea
m1	chr1	78174709	78174709	OpenSea
m1	chr1	78180274	78180274	OpenSea
m1	chr1	78221337	78221337	Shelf
m1	chr1	78273462	78273462	Shelf
m1	chr1	78277606	78277606	Island
m1	chr1	78280850	78280850	Shelf
m1	chr1	78282478	78282478	OpenSea
m1	chr1	78340579	78340579	OpenSea
m1	chr1	78343253	78343253	OpenSea
m1	chr1	78367295	78367295	OpenSea
m1	chr1	78393920	78393920	OpenSea
m1	chr1	78751952	78751952	OpenSea
m1	chr1	78960610	78960610	Shelf
m1	chr1	79088769	79088769	OpenSea
m1	chr1	79118191	79118191	OpenSea
m1	chr1	84464224	84465150	Island
m1	chr1	85288233	85288233	OpenSea
m1	chr1	85391429	85391429	OpenSea
m1	chr1	85426586	85426586	OpenSea
m1	chr1	85786958	85786958	OpenSea
m1	chr1	85864304	85864304	OpenSea
m1	chr1	85883665	85883665	OpenSea
m1	chr1	86195775	86195775	OpenSea
m1	chr1	87019355	87019355	Shore
m1	chr1	87112050	87112050	OpenSea
m1	chr1	87484460	87484460	OpenSea
m1	chr1	87549880	87549880	OpenSea
m1	chr1	87613403	87613403	Shelf
m1	chr1	89196864	89196864	OpenSea
m1	chr1	89445880	89445880	OpenSea
m1	chr1	89580443	89580443	OpenSea
m1	chr1	89615433	89615433	OpenSea
m1	chr1	89616547	89616557	OpenSea
m1	chr1	90363165	90363165	OpenSea
m1	chr1	90463746	90463746	Shelf
m1	chr1	90478723	90478723	OpenSea
m1	chr1	91403111	91403111	OpenSea
m1	chr1	91814033	91814033	OpenSea
m1	chr1	92099528	92100107	OpenSea
m1	chr1	92282206	92282206	OpenSea
m1	chr1	92329399	92329399	OpenSea
m1	chr1	92683403	92683403	Shore
m1	chr1	92683821	92683821	Shore
m1	chr1	93246698	93246698	Shelf
m1	chr1	93718087	93718087	OpenSea
m1	chr1	93741342	93741342	OpenSea
m1	chr1	94006866	94006866	OpenSea
m1	chr1	94090449	94090449	OpenSea
m1	chr1	94354654	94354654	OpenSea
m1	chr1	94528115	94528115	OpenSea
m1	chr1	97279796	97279796	OpenSea
m1	chr1	97833212	97833212	OpenSea
m1	chr1	99190917	99190917	OpenSea
m1	chr1	100335651	100335651	OpenSea
m1	chr1	100439047	100439047	Shelf
m1	chr1	100462710	100462710	OpenSea
m1	chr1	100615552	100615552	OpenSea
m1	chr1	100644654	100644688	OpenSea
m1	chr1	100675407	100675407	Shelf
m1	chr1	100678767	100678767	Island
m1	chr1	100681010	100681010	Shore
m1	chr1	100950871	100950871	OpenSea
m1	chr1	101002266	101002289	Shelf
m1	chr1	101204337	101204337	OpenSea
m1	chr1	101364724	101364724	Shelf
m1	chr1	101437439	101437439	OpenSea
m1	chr1	101462013	101462013	OpenSea
m1	chr1	101702782	101703749	Shore
m1	chr1	102312608	102312671	OpenSea
m1	chr1	107798257	107798257	OpenSea
m1	chr1	108232421	108232421	OpenSea
m1	chr1	108678738	108678738	OpenSea
m1	chr1	108732310	108732310	Shelf
m1	chr1	109264283	109264283	OpenSea
m1	chr1	109271795	109271795	OpenSea
m1	chr1	109418132	109419421	Shore
m1	chr1	109553055	109553055	OpenSea
m1	chr1	109805584	109805584	Shelf
m1	chr1	110461123	110461123	OpenSea
m1	chr1	110906299	110906299	OpenSea
m1	chr1	111214851	111216000	Shore
m1	chr1	111490459	111490669	OpenSea
m1	chr1	111679318	111679318	Shelf
m1	chr1	111722281	111722281	OpenSea
m1	chr1	111729823	111729823	OpenSea
m1	chr1	111854339	111854339	OpenSea
m1	chr1	112061221	112061221	Shelf
m1	chr1	112422473	112422473	OpenSea
m1	chr1	113124860	113124860	OpenSea
m1	chr1	113269584	113269584	Shelf
m1	chr1	114227391	114227391	OpenSea
m1	chr1	114298184	114298184	Shelf
m1	chr1	114450639	114451855	Shelf
m1	chr1	114499783	114499783	OpenSea
m1	chr1	115003638	115003638	OpenSea
m1	chr1	115110293	115110293	OpenSea
m1	chr1	115164619	115164619	OpenSea
m1	chr1	115572863	115572863	OpenSea
m1	chr1	116187035	116187035	Shore
m1	chr1	116193783	116194194	OpenSea
m1	chr1	116385005	116385005	Shelf
m1	chr1	117503952	117504034	OpenSea
m1	chr1	117695016	117695016	OpenSea
m1	chr1	118066288	118066288	OpenSea
m1	chr1	118168275	118168275	OpenSea
m1	chr1	118435653	118435653	OpenSea
m1	chr1	118540478	118540478	OpenSea
m1	chr1	119630715	119630715	OpenSea
m1	chr1	120255941	120255992	Shore
m1	chr1	120292140	120292140	OpenSea
m1	chr1	120354159	120355361	OpenSea
m1	chr1	120387965	120387965	OpenSea
m1	chr1	120389211	120389211	OpenSea
m1	chr1	144935409	144935409	Shelf
m1	chr1	145466550	145466550	Shelf
m1	chr1	145592743	145592743	Shelf
m1	chr1	145663297	145663297	OpenSea
m1	chr1	145688481	145688481	OpenSea
m1	chr1	146640598	146640598	Shelf
m1	chr1	146695178	146695178	OpenSea
m1	chr1	147379676	147380038	Shore
m1	chr1	150252074	150252074	Shelf
m1	chr1	150672619	150672619	OpenSea
m1	chr1	150770803	150770803	OpenSea
m1	chr1	150946674	150947949	Island
m1	chr1	151282686	151282686	OpenSea
m1	chr1	151399683	151399683	OpenSea
m1	chr1	151516778	151517130	Shelf
m1	chr1	151627357	151627357	OpenSea
m1	chr1	151862153	151862153	OpenSea
m1	chr1	151958685	151958685	OpenSea
m1	chr1	152733025	152733337	Island
m1	chr1	152957018	152958102	OpenSea
m1	chr1	153124825	153124825	OpenSea
m1	chr1	153599479	153601878	OpenSea
m1	chr1	154938439	154938439	Shelf
m1	chr1	155305329	155305329	OpenSea
m1	chr1	155448900	155448900	OpenSea
m1	chr1	155641827	155641827	OpenSea
m1	chr1	155832982	155832982	Shelf
m1	chr1	156083251	156084398	Shore
m1	chr1	156134103	156134103	OpenSea
m1	chr1	156215951	156217801	Shore
m1	chr1	156310970	156310970	Shelf
m1	chr1	156611963	156612436	Island
m1	chr1	157103641	157103641	OpenSea
m1	chr1	157747979	157747979	OpenSea
m1	chr1	158037893	158037893	OpenSea
m1	chr1	158671873	158671873	OpenSea
m1	chr1	160031653	160031653	OpenSea
m1	chr1	160037877	160037877	Shelf
m1	chr1	160038302	160039990	Shore
m1	chr1	160053931	160054321	Island
m1	chr1	160135275	160135527	OpenSea
m1	chr1	160137816	160137816	OpenSea
m1	chr1	160192119	160192119	OpenSea
m1	chr1	160770752	160770752	Shore
m1	chr1	160774690	160774690	Shelf
m1	chr1	160824025	160824025	OpenSea
m1	chr1	160987731	160987731	Shelf
m1	chr1	161954657	161954657	Shore
m1	chr1	161956573	161956573	Shelf
m1	chr1	161983790	161983790	OpenSea
m1	chr1	162183582	162183582	OpenSea
m1	chr1	162311167	162311167	OpenSea
m1	chr1	162534495	162534495	Shelf
m1	chr1	162711669	162711669	OpenSea
m1	chr1	162838743	162838907	OpenSea
m1	chr1	163126440	163126440	OpenSea
m1	chr1	164545553	164545843	Island
m1	chr1	164604806	164604806	OpenSea
m1	chr1	164671829	164671829	OpenSea
m1	chr1	164695453	164695453	OpenSea
m1	chr1	164756311	164756311	OpenSea
m1	chr1	164819399	164819900	OpenSea
m1	chr1	165321224	165321224	Shore
m1	chr1	165873825	165873825	OpenSea
m1	chr1	167385243	167385243	OpenSea
m1	chr1	167433047	167433047	OpenSea
m1	chr1	167675151	167675151	OpenSea
m1	chr1	167689891	167690788	Shore
m1	chr1	167786802	167786802	Shelf
m1	chr1	167791030	167791030	Shore
m1	chr1	167910467	167910467	Shelf
m1	chr1	168023375	168023375	Shelf
m1	chr1	168025917	168025917	Shore
m1	chr1	168029713	168029713	Shelf
m1	chr1	168076667	168076667	OpenSea
m1	chr1	168170646	168170646	OpenSea
m1	chr1	168514108	168514108	OpenSea
m1	chr1	168758593	168758593	OpenSea
m1	chr1	169342772	169342772	OpenSea
m1	chr1	169394524	169394524	Shelf
m1	chr1	169696560	169696560	OpenSea
m1	chr1	169762046	169762046	Shore
m1	chr1	169860805	169860805	Shore
m1	chr1	170245286	170245286	OpenSea
m1	chr1	170514245	170514245	OpenSea
m1	chr1	170522223	170522223	OpenSea
m1	chr1	170669166	170669166	OpenSea
m1	chr1	170904596	170904596	OpenSea
m1	chr1	171071250	171071334	OpenSea
m1	chr1	171604882	171604882	OpenSea
m1	chr1	171707535	171707535	Shelf
m1	chr1	171887300	171887300	OpenSea
m1	chr1	172153227	172153227	OpenSea
m1	chr1	172248635	172248635	OpenSea
m1	chr1	172262169	172262169	OpenSea
m1	chr1	172505895	172505895	Shelf
m1	chr1	172543864	172543864	OpenSea
m1	chr1	172580699	172580699	OpenSea
m1	chr1	173012051	173012051	OpenSea
m1	chr1	173517966	173517966	OpenSea
m1	chr1	173579110	173579110	OpenSea
m1	chr1	173768981	173768981	OpenSea
m1	chr1	174779911	174779911	OpenSea
m1	chr1	175048753	175048873	Island
m1	chr1	175565371	175565371	Shelf
m1	chr1	175568377	175568710	Island
m1	chr1	176919570	176919570	OpenSea
m1	chr1	178241791	178241791	OpenSea
m1	chr1	178263527	178263527	OpenSea
m1	chr1	178510520	178510520	Shore
m1	chr1	178514897	178515751	Shelf
m1	chr1	179152830	179152830	OpenSea
m1	chr1	179322762	179322762	OpenSea
m1	chr1	179459849	179459849	OpenSea
m1	chr1	179521085	179521085	OpenSea
m1	chr1	179757065	179757065	OpenSea
m1	chr1	180323123	180323123	OpenSea
m1	chr1	180831396	180831396	OpenSea
m1	chr1	180850588	180850588	OpenSea
m1	chr1	181716263	181716263	OpenSea
m1	chr1	181766077	181766077	Shore
m1	chr1	182024689	182025232	Shore
m1	chr1	182634861	182634861	OpenSea
m1	chr1	182638158	182638158	OpenSea
m1	chr1	182879035	182879035	OpenSea
m1	chr1	182921660	182921688	Shore
m1	chr1	182922705	182923750	Shore
m1	chr1	183067225	183067225	OpenSea
m1	chr1	183070351	183070351	OpenSea
m1	chr1	183113763	183113763	OpenSea
m1	chr1	183210104	183210104	OpenSea
m1	chr1	183272731	183272731	OpenSea
m1	chr1	184025029	184025029	Shelf
m1	chr1	184558493	184558493	OpenSea
m1	chr1	184591081	184591081	OpenSea
m1	chr1	185023471	185023741	OpenSea
m1	chr1	185044114	185044114	OpenSea
m1	chr1	185113945	185113945	OpenSea
m1	chr1	185822829	185822829	OpenSea
m1	chr1	185984412	185984412	OpenSea
m1	chr1	186107500	186107500	OpenSea
m1	chr1	186159350	186159350	OpenSea
m1	chr1	186340995	186340995	Shelf
m1	chr1	186370528	186370528	OpenSea
m1	chr1	186429967	186429967	OpenSea
m1	chr1	186646027	186646027	Shelf
m1	chr1	192285333	192285333	OpenSea
m1	chr1	192304785	192304785	OpenSea
m1	chr1	193032741	193032741	Shelf
m1	chr1	193075191	193075640	Shore
m1	chr1	193144639	193144639	OpenSea
m1	chr1	197099113	197099113	OpenSea
m1	chr1	197124878	197124878	OpenSea
m1	chr1	197704774	197704881	OpenSea
m1	chr1	197870871	197871534	Shore
m1	chr1	198201193	198201614	OpenSea
m1	chr1	198259669	198259669	OpenSea
m1	chr1	198658716	198658716	OpenSea
m1	chr1	198711467	198711467	OpenSea
m1	chr1	199995777	199996237	OpenSea
m1	chr1	200014673	200014673	Shelf
m1	chr1	200143149	200143149	OpenSea
m1	chr1	200586761	200586761	Shelf
m1	chr1	200728684	200728684	OpenSea
m1	chr1	200941616	200941706	OpenSea
m1	chr1	201034930	201034930	OpenSea
m1	chr1	201197846	201197846	Shore
m1	chr1	201487843	201489142	OpenSea
m1	chr1	201665422	201665422	OpenSea
m1	chr1	201856763	201858661	OpenSea
m1	chr1	201953356	201953356	Shore
m1	chr1	202093479	202093479	OpenSea
m1	chr1	202208065	202208088	OpenSea
m1	chr1	202430474	202430474	OpenSea
m1	chr1	202677309	202677309	Shore
m1	chr1	202848987	202848987	OpenSea
m1	chr1	202897531	202897531	Shore
m1	chr1	203602040	203602040	Shelf
m1	chr1	204042270	204044509	Island
m1	chr1	204076863	204076863	OpenSea
m1	chr1	204226566	204226892	Island
m1	chr1	204593784	204593784	OpenSea
m1	chr1	205038785	205039083	Island
m1	chr1	205053265	205054828	OpenSea
m1	chr1	205240462	205240462	Shore
m1	chr1	205291215	205292215	Shore
m1	chr1	205325859	205327054	OpenSea
m1	chr1	205488243	205488243	OpenSea
m1	chr1	205569863	205569863	OpenSea
m1	chr1	205597307	205597307	Shelf
m1	chr1	205817233	205818668	Shore
m1	chr1	205818956	205819179	Island
m1	chr1	206811495	206811495	Shelf
m1	chr1	207000757	207000757	OpenSea
m1	chr1	207013239	207013239	OpenSea
m1	chr1	207299185	207299185	OpenSea
m1	chr1	207533457	207533457	OpenSea
m1	chr1	207819196	207819196	Shore
m1	chr1	207822002	207822002	Shelf
m1	chr1	207850707	207850707	OpenSea
m1	chr1	207963099	207963099	OpenSea
m1	chr1	209600926	209602955	OpenSea
m1	chr1	209759145	209759344	OpenSea
m1	chr1	211487219	211487219	OpenSea
m1	chr1	211591896	211591896	Shore
m1	chr1	211846010	211846010	Shelf
m1	chr1	212483036	212483036	OpenSea
m1	chr1	212610356	212610356	Shelf
m1	chr1	212786822	212786822	Shelf
m1	chr1	212904750	212904750	OpenSea
m1	chr1	213021261	213021979	OpenSea
m1	chr1	213128487	213128487	Shelf
m1	chr1	214551360	214551360	OpenSea
m1	chr1	214557497	214557928	Shore
m1	chr1	214566173	214567074	OpenSea
m1	chr1	214627705	214627705	OpenSea
m1	chr1	214657859	214657859	OpenSea
m1	chr1	214691389	214691389	OpenSea
m1	chr1	214782654	214782654	Shore
m1	chr1	214837903	214837903	OpenSea
m1	chr1	215409184	215409184	OpenSea
m1	chr1	217110605	217110605	OpenSea
m1	chr1	217265862	217265862	Shelf
m1	chr1	217604232	217604611	OpenSea
m1	chr1	217671559	217671559	OpenSea
m1	chr1	219346607	219347021	Shore
m1	chr1	219361962	219361962	OpenSea
m1	chr1	219375142	219375142	OpenSea
m1	chr1	219383604	219383604	OpenSea
m1	chr1	220292508	220292590	OpenSea
m1	chr1	220375253	220375253	OpenSea
m1	chr1	220836705	220836705	OpenSea
m1	chr1	221057558	221057751	Island
m1	chr1	221057808	221058198	Shore
m1	chr1	222839607	222839607	OpenSea
m1	chr1	222919977	222919977	OpenSea
m1	chr1	223285901	223285901	OpenSea
m1	chr1	223745234	223745234	Shore
m1	chr1	223840925	223840974	OpenSea
m1	chr1	223972634	223972634	OpenSea
m1	chr1	224024803	224024803	OpenSea
m1	chr1	224445738	224445738	OpenSea
m1	chr1	225707049	225707049	OpenSea
m1	chr1	225766155	225766768	OpenSea
m1	chr1	225821245	225821245	OpenSea
m1	chr1	226016389	226016389	OpenSea
m1	chr1	226371240	226371240	Shelf
m1	chr1	226420174	226420174	OpenSea
m1	chr1	226448825	226448825	OpenSea
m1	chr1	226568309	226568309	OpenSea
m1	chr1	226922948	226924311	Shore
m1	chr1	227131420	227131420	Shelf
m1	chr1	227141293	227141293	OpenSea
m1	chr1	227163775	227163996	Island
m1	chr1	227173653	227175077	OpenSea
m1	chr1	227327429	227327429	OpenSea
m1	chr1	228136503	228136982	Shore
m1	chr1	228284292	228284292	OpenSea
m1	chr1	228295858	228295858	Shore
m1	chr1	228336130	228337776	OpenSea
m1	chr1	228363521	228363521	Shore
m1	chr1	229433246	229433246	OpenSea
m1	chr1	229477078	229477759	Shore
m1	chr1	230228472	230228472	OpenSea
m1	chr1	230991708	230992990	OpenSea
m1	chr1	231302931	231302931	Shelf
m1	chr1	231474535	231475345	Shore
m1	chr1	231489252	231489252	OpenSea
m1	chr1	231500113	231500113	OpenSea
m1	chr1	231518525	231518525	OpenSea
m1	chr1	231694386	231694386	OpenSea
m1	chr1	231954287	231955433	OpenSea
m1	chr1	233144837	233144837	OpenSea
m1	chr1	234361804	234361804	OpenSea
m1	chr1	234459840	234459840	OpenSea
m1	chr1	235507088	235507088	OpenSea
m1	chr1	235803662	235803662	Shore
m1	chr1	235825993	235825993	OpenSea
m1	chr1	235827138	235827138	OpenSea
m1	chr1	236157492	236157492	Shore
m1	chr1	236192895	236193517	OpenSea
m1	chr1	236372060	236372060	OpenSea
m1	chr1	236442072	236442072	Shelf
m1	chr1	236643871	236643871	OpenSea
m1	chr1	236690364	236690364	Shelf
m1	chr1	236723079	236723154	OpenSea
m1	chr1	236850361	236850361	Shore
m1	chr1	237843967	237843967	OpenSea
m1	chr1	239987344	239987399	OpenSea
m1	chr1	240457495	240457495	OpenSea
m1	chr1	240568125	240568125	Shore
m1	chr1	240659780	240659780	Shelf
m1	chr1	240938945	240938945	OpenSea
m1	chr1	241162718	241162718	OpenSea
m1	chr1	241912510	241912768	OpenSea
m1	chr1	242044107	242044107	OpenSea
m1	chr1	242052841	242052841	OpenSea
m1	chr1	243391613	243391613	OpenSea
m1	chr1	243479948	243479948	OpenSea
m1	chr1	243645911	243646318	Shore
m1	chr1	243646395	243646787	Island
m1	chr1	243736307	243736307	OpenSea
m1	chr1	244217209	244217562	Shore
m1	chr1	244514561	244514602	OpenSea
m1	chr1	244615947	244616846	Shore
m1	chr1	245238552	245238552	OpenSea
m1	chr1	245358696	245358696	OpenSea
m1	chr1	245581404	245581518	OpenSea
m1	chr1	245747991	245747991	OpenSea
m1	chr1	245753302	245753302	Shore
m1	chr1	245753411	245753635	Island
m1	chr1	245755268	245755268	Shore
m1	chr1	245836513	245836746	Island
m1	chr1	245836835	245836835	Shore
m1	chr1	246059139	246059139	OpenSea
m1	chr1	246167443	246167443	OpenSea
m1	chr1	246414665	246414665	Shore
m1	chr1	246429789	246429789	OpenSea
m1	chr1	246582071	246582116	OpenSea
m1	chr1	246599230	246599230	OpenSea
m1	chr1	246613311	246613311	OpenSea
m1	chr1	246717609	246717609	OpenSea
m1	chr1	246741712	246741712	OpenSea
m1	chr1	246795610	246795610	OpenSea
m1	chr1	247200553	247200553	OpenSea
m1	chr1	247767976	247769804	OpenSea
m1	chr1	247978690	247980207	OpenSea
m1	chr1	248083146	248083146	OpenSea
m1	chr2	47150	47716	Shore
m1	chr2	250003	250003	OpenSea
m1	chr2	269218	269218	Shelf
m1	chr2	287354	289731	Island
m1	chr2	1062590	1062590	OpenSea
m1	chr2	1159491	1159491	Shelf
m1	chr2	1229277	1229351	OpenSea
m1	chr2	1276773	1276824	OpenSea
m1	chr2	1284433	1286216	Shore
m1	chr2	1286394	1286544	Island
m1	chr2	1415911	1418294	OpenSea
m1	chr2	1484125	1484593	Shelf
m1	chr2	1489909	1489909	Shelf
m1	chr2	1493713	1493713	Island
m1	chr2	1494681	1494681	Shore
m1	chr2	1793435	1793435	OpenSea
m1	chr2	1853176	1853176	OpenSea
m1	chr2	1928442	1928480	OpenSea
m1	chr2	2030038	2030970	OpenSea
m1	chr2	2111623	2111648	OpenSea
m1	chr2	2189201	2190137	Island
m1	chr2	2328391	2328709	OpenSea
m1	chr2	3270259	3270259	OpenSea
m1	chr2	3286338	3286479	Island
m1	chr2	3290128	3290818	Shore
m1	chr2	3291358	3291401	Island
m1	chr2	3379965	3379965	Shore
m1	chr2	3463558	3463558	Shore
m1	chr2	3464066	3465781	Shelf
m1	chr2	3501998	3501998	Shelf
m1	chr2	3502446	3502815	Shore
m1	chr2	3504718	3505080	Shore
m1	chr2	3507404	3507992	Shelf
m1	chr2	3521258	3522243	Shore
m1	chr2	3524596	3524784	Shore
m1	chr2	3654242	3654582	OpenSea
m1	chr2	6072139	6072981	OpenSea
m1	chr2	7029602	7029602	OpenSea
m1	chr2	8063199	8063199	OpenSea
m1	chr2	8112652	8112652	OpenSea
m1	chr2	8997977	8997977	OpenSea
m1	chr2	9027671	9027671	OpenSea
m1	chr2	9531164	9531269	Shelf
m1	chr2	9549277	9549336	OpenSea
m1	chr2	9628525	9628525	OpenSea
m1	chr2	9679744	9679744	OpenSea
m1	chr2	10111071	10111071	OpenSea
m1	chr2	10114151	10114151	OpenSea
m1	chr2	10271367	10271367	OpenSea
m1	chr2	10302391	10302462	OpenSea
m1	chr2	10501297	10501297	OpenSea
m1	chr2	10712018	10712241	OpenSea
m1	chr2	10760591	10760591	OpenSea
m1	chr2	10916238	10916392	OpenSea
m1	chr2	11054229	11054229	Shore
m1	chr2	11750156	11750735	Shore
m1	chr2	11921850	11921850	Shelf
m1	chr2	11927644	11927644	Shelf
m1	chr2	11953281	11953290	OpenSea
m1	chr2	17692189	17692189	OpenSea
m1	chr2	18744324	18744324	Shelf
m1	chr2	18763713	18763713	Shelf
m1	chr2	19553237	19553422	Island
m1	chr2	20144847	20144847	OpenSea
m1	chr2	20494247	20494247	OpenSea
m1	chr2	20515455	20515455	OpenSea
m1	chr2	23679420	23679465	OpenSea
m1	chr2	23699034	23699034	OpenSea
m1	chr2	23721722	23721722	OpenSea
m1	chr2	23786588	23786588	Shore
m1	chr2	23850319	23850586	Shore
m1	chr2	23853232	23853232	Shore
m1	chr2	23879137	23879137	OpenSea
m1	chr2	23907989	23907989	OpenSea
m1	chr2	24026544	24026544	OpenSea
m1	chr2	24146420	24146420	Shelf
m1	chr2	24259721	24259920	OpenSea
m1	chr2	24342860	24342860	Shelf
m1	chr2	24401009	24401009	Shelf
m1	chr2	24521631	24521631	OpenSea
m1	chr2	25050403	25051151	OpenSea
m1	chr2	25190741	25190741	Shelf
m1	chr2	25560263	25560263	Shelf
m1	chr2	25818974	25818974	OpenSea
m1	chr2	25862633	25862770	OpenSea
m1	chr2	26098817	26098817	Shore
m1	chr2	26565759	26565759	Shelf
m1	chr2	27226681	27226681	OpenSea
m1	chr2	27500683	27500683	OpenSea
m1	chr2	27531535	27532725	Shore
m1	chr2	27597821	27598767	Shelf
m1	chr2	27809545	27809545	Shelf
m1	chr2	27845233	27845233	OpenSea
m1	chr2	28449036	28449036	OpenSea
m1	chr2	29214531	29214531	OpenSea
m1	chr2	29353850	29353850	OpenSea
m1	chr2	29643465	29643465	OpenSea
m1	chr2	30040525	30041338	OpenSea
m1	chr2	30373187	30373187	Shelf
m1	chr2	30802226	30802226	OpenSea
m1	chr2	31001063	31001063	OpenSea
m1	chr2	31362226	31362226	Shore
m1	chr2	31749899	31749899	OpenSea
m1	chr2	32293342	32293342	Shelf
m1	chr2	32394762	32394762	Shelf
m1	chr2	32446172	32446172	OpenSea
m1	chr2	32483287	32483287	OpenSea
m1	chr2	33106489	33106489	OpenSea
m1	chr2	33183321	33183321	OpenSea
m1	chr2	33240386	33240386	OpenSea
m1	chr2	33500889	33500889	OpenSea
m1	chr2	33815183	33815183	OpenSea
m1	chr2	36648738	36648738	OpenSea
m1	chr2	36718460	36718460	OpenSea
m1	chr2	36721423	36721423	OpenSea
m1	chr2	36725928	36725928	OpenSea
m1	chr2	37032102	37032102	Shelf
m1	chr2	37041582	37041582	OpenSea
m1	chr2	37374960	37376067	OpenSea
m1	chr2	37475524	37475524	OpenSea
m1	chr2	37543459	37543814	OpenSea
m1	chr2	38191377	38191377	OpenSea
m1	chr2	38221017	38221017	OpenSea
m1	chr2	38272884	38272884	OpenSea
m1	chr2	38812043	38812043	OpenSea
m1	chr2	38818738	38818738	OpenSea
m1	chr2	39109167	39109167	OpenSea
m1	chr2	39145108	39145400	OpenSea
m1	chr2	39191959	39191959	Shelf
m1	chr2	39209066	39209066	OpenSea
m1	chr2	39295686	39295686	OpenSea
m1	chr2	39298958	39298958	OpenSea
m1	chr2	39344463	39344463	Shelf
m1	chr2	39406099	39406099	OpenSea
m1	chr2	39922943	39922943	OpenSea
m1	chr2	40472772	40472772	OpenSea
m1	chr2	42423477	42423477	OpenSea
m1	chr2	42803024	42803024	OpenSea
m1	chr2	43001499	43001499	OpenSea
m1	chr2	43458096	43458096	Shelf
m1	chr2	43546568	43546568	OpenSea
m1	chr2	43584626	43584626	OpenSea
m1	chr2	43654130	43654130	OpenSea
m1	chr2	43675268	43675268	OpenSea
m1	chr2	44172074	44172074	OpenSea
m1	chr2	44400179	44400179	Shelf
m1	chr2	44689831	44689831	OpenSea
m1	chr2	45232417	45232417	Island
m1	chr2	45616428	45616428	OpenSea
m1	chr2	45649372	45649372	OpenSea
m1	chr2	45779808	45779808	OpenSea
m1	chr2	46110087	46110087	OpenSea
m1	chr2	46113875	46113875	OpenSea
m1	chr2	46150090	46150090	OpenSea
m1	chr2	46791080	46791080	OpenSea
m1	chr2	46932476	46932476	OpenSea
m1	chr2	46977373	46977373	OpenSea
m1	chr2	47058307	47058307	OpenSea
m1	chr2	47084194	47084194	OpenSea
m1	chr2	47633216	47633216	Shelf
m1	chr2	47755888	47755888	OpenSea
m1	chr2	47768650	47768650	OpenSea
m1	chr2	48046329	48046329	OpenSea
m1	chr2	48809499	48809499	OpenSea
m1	chr2	49271470	49271470	OpenSea
m1	chr2	50153077	50153077	OpenSea
m1	chr2	50201413	50201511	OpenSea
m1	chr2	50422390	50422390	OpenSea
m1	chr2	50574196	50574708	Island
m1	chr2	50623873	50623873	OpenSea
m1	chr2	50852209	50852209	OpenSea
m1	chr2	54017536	54017536	Shelf
m1	chr2	54087343	54087552	Shore
m1	chr2	54517167	54517382	OpenSea
m1	chr2	54809763	54809763	OpenSea
m1	chr2	55015049	55015049	OpenSea
m1	chr2	55047815	55047815	OpenSea
m1	chr2	55174473	55174473	OpenSea
m1	chr2	55183957	55183957	OpenSea
m1	chr2	55446669	55446669	Shelf
m1	chr2	55477848	55477848	OpenSea
m1	chr2	56103666	56103666	OpenSea
m1	chr2	56127942	56127942	OpenSea
m1	chr2	56152003	56152003	Shore
m1	chr2	56210182	56210182	OpenSea
m1	chr2	56574420	56574420	OpenSea
m1	chr2	58386677	58386677	OpenSea
m1	chr2	58468651	58469051	Shore
m1	chr2	60685678	60685678	Shelf
m1	chr2	60689043	60689043	Shore
m1	chr2	61149856	61149856	OpenSea
m1	chr2	61194733	61194733	OpenSea
m1	chr2	61298781	61298781	OpenSea
m1	chr2	61351337	61351337	OpenSea
m1	chr2	61645604	61645972	OpenSea
m1	chr2	62113199	62113199	Shelf
m1	chr2	62449795	62450705	OpenSea
m1	chr2	62899546	62901175	OpenSea
m1	chr2	63198779	63198779	OpenSea
m1	chr2	63606136	63606136	OpenSea
m1	chr2	63665072	63665072	OpenSea
m1	chr2	63667788	63667788	OpenSea
m1	chr2	63829110	63829110	OpenSea
m1	chr2	63834284	63834284	OpenSea
m1	chr2	64099621	64099621	OpenSea
m1	chr2	64242453	64242453	Shelf
m1	chr2	64372160	64373042	Shore
m1	chr2	64789303	64789303	OpenSea
m1	chr2	65358440	65358440	Shore
m1	chr2	65542715	65542715	Shore
m1	chr2	66720291	66720291	OpenSea
m1	chr2	66789740	66789740	OpenSea
m1	chr2	68269960	68269960	OpenSea
m1	chr2	68273829	68273829	OpenSea
m1	chr2	68403007	68403007	OpenSea
m1	chr2	68982638	68982638	OpenSea
m1	chr2	69093574	69093574	OpenSea
m1	chr2	69243428	69243428	Shelf
m1	chr2	69396932	69396932	OpenSea
m1	chr2	69785993	69785993	OpenSea
m1	chr2	70061514	70061514	Shelf
m1	chr2	70101157	70101157	OpenSea
m1	chr2	70408459	70408459	OpenSea
m1	chr2	70418827	70418872	Shore
m1	chr2	70437536	70437536	OpenSea
m1	chr2	70484527	70485230	Shore
m1	chr2	70507416	70507416	OpenSea
m1	chr2	70676036	70676036	OpenSea
m1	chr2	71129289	71129289	Shore
m1	chr2	71137834	71137834	Shelf
m1	chr2	71294879	71294879	Shore
m1	chr2	71754492	71754492	OpenSea
m1	chr2	73048869	73048869	Shelf
m1	chr2	73172128	73172128	OpenSea
m1	chr2	73335308	73335308	Shelf
m1	chr2	73616832	73617110	Shelf
m1	chr2	73989455	73989455	OpenSea
m1	chr2	74055267	74055599	Shore
m1	chr2	74086256	74086256	OpenSea
m1	chr2	74126232	74126232	OpenSea
m1	chr2	74401583	74401583	Shelf
m1	chr2	74588598	74588598	OpenSea
m1	chr2	74590743	74590743	OpenSea
m1	chr2	74601431	74603226	OpenSea
m1	chr2	74663416	74663698	Island
m1	chr2	74667600	74669387	Island
m1	chr2	74669516	74669516	Shore
m1	chr2	75058623	75058733	Shelf
m1	chr2	75119917	75119917	OpenSea
m1	chr2	75189750	75189750	Shelf
m1	chr2	75928516	75928516	OpenSea
m1	chr2	79314745	79314745	OpenSea
m1	chr2	79316004	79316020	OpenSea
m1	chr2	80341377	80341377	OpenSea
m1	chr2	80529990	80530770	Island
m1	chr2	80875515	80875515	OpenSea
m1	chr2	84851628	84851674	OpenSea
m1	chr2	85269006	85269006	OpenSea
m1	chr2	85416793	85416793	OpenSea
m1	chr2	85505567	85505567	OpenSea
m1	chr2	85507363	85507363	OpenSea
m1	chr2	85531470	85531486	OpenSea
m1	chr2	85580627	85581528	Shore
m1	chr2	86790673	86791105	Shore
m1	chr2	87003351	87003351	OpenSea
m1	chr2	87142071	87142071	Shore
m1	chr2	88473871	88473871	Shelf
m1	chr2	95454285	95454535	OpenSea
m1	chr2	95690169	95690821	Shore
m1	chr2	95822125	95822125	Shelf
m1	chr2	95961681	95961703	OpenSea
m1	chr2	95978173	95978534	OpenSea
m1	chr2	95992655	95992762	OpenSea
m1	chr2	96860818	96860818	OpenSea
m1	chr2	97215789	97216131	Island
m1	chr2	97302668	97303624	Shore
m1	chr2	97618137	97618624	OpenSea
m1	chr2	98443665	98443665	OpenSea
m1	chr2	98707797	98707797	Shelf
m1	chr2	98802868	98803109	OpenSea
m1	chr2	98827983	98828226	OpenSea
m1	chr2	98966779	98966779	Shelf
m1	chr2	99004092	99004616	OpenSea
m1	chr2	99060337	99060584	Shore
m1	chr2	99216068	99216068	OpenSea
m1	chr2	99948976	99948976	Shelf
m1	chr2	100214446	100214446	Shelf
m1	chr2	100422620	100422620	OpenSea
m1	chr2	100615071	100615071	OpenSea
m1	chr2	100627285	100627285	OpenSea
m1	chr2	101440696	101440696	Shelf
m1	chr2	101557047	101557047	OpenSea
m1	chr2	101635691	101635691	OpenSea
m1	chr2	101666894	101667004	OpenSea
m1	chr2	101675766	101676513	OpenSea
m1	chr2	101752032	101752032	OpenSea
m1	chr2	101761014	101761014	OpenSea
m1	chr2	102807257	102807257	Shelf
m1	chr2	102979704	102979704	OpenSea
m1	chr2	103014454	103014454	OpenSea
m1	chr2	103149495	103149495	OpenSea
m1	chr2	105073367	105073367	OpenSea
m1	chr2	105118547	105118579	OpenSea
m1	chr2	105689122	105689122	OpenSea
m1	chr2	105956343	105956343	Shelf
m1	chr2	105980029	105980029	OpenSea
m1	chr2	106467587	106468546	OpenSea
m1	chr2	106483650	106483650	OpenSea
m1	chr2	106507850	106507850	Shore
m1	chr2	106685045	106685045	Shelf
m1	chr2	106761673	106761805	OpenSea
m1	chr2	107459661	107459860	Island
m1	chr2	108863679	108863679	OpenSea
m1	chr2	109107826	109107826	OpenSea
m1	chr2	109400084	109400084	Shelf
m1	chr2	109907962	109907962	OpenSea
m1	chr2	110365472	110365472	OpenSea
m1	chr2	110959266	110959266	Shelf
m1	chr2	111498847	111498847	OpenSea
m1	chr2	111556206	111556607	OpenSea
m1	chr2	111593263	111593263	OpenSea
m1	chr2	111914486	111914486	OpenSea
m1	chr2	112943859	112944644	Shore
m1	chr2	113250679	113250679	OpenSea
m1	chr2	113342738	113342738	Shore
m1	chr2	113537166	113537166	OpenSea
m1	chr2	113587675	113587675	OpenSea
m1	chr2	115336559	115336559	OpenSea
m1	chr2	115421931	115421931	Shore
m1	chr2	115423582	115423582	Shelf
m1	chr2	118589706	118589706	Shelf
m1	chr2	120237432	120237911	OpenSea
m1	chr2	120559075	120559075	OpenSea
m1	chr2	121050252	121050252	OpenSea
m1	chr2	121609874	121609874	OpenSea
m1	chr2	121621408	121621408	Shelf
m1	chr2	121749280	121749280	Shelf
m1	chr2	121980399	121980399	Shelf
m1	chr2	127426516	127426516	OpenSea
m1	chr2	127942965	127942965	OpenSea
m1	chr2	128099688	128099688	OpenSea
m1	chr2	128175905	128176007	Shelf
m1	chr2	128186748	128186748	Shore
m1	chr2	128347901	128347901	Shelf
m1	chr2	128402294	128404486	OpenSea
m1	chr2	128409012	128409268	Island
m1	chr2	128410602	128410803	Island
m1	chr2	128412420	128412420	Shore
m1	chr2	128415068	128415068	OpenSea
m1	chr2	128436717	128436717	Shelf
m1	chr2	128460787	128460787	Shore
m1	chr2	128464939	128464939	OpenSea
m1	chr2	128469641	128469707	Shore
m1	chr2	128475701	128475701	OpenSea
m1	chr2	128494954	128494954	OpenSea
m1	chr2	128636894	128636894	OpenSea
m1	chr2	128781691	128781691	Shelf
m1	chr2	129047760	129047760	OpenSea
m1	chr2	130876007	130876007	Shelf
m1	chr2	131750110	131750110	OpenSea
m1	chr2	131904854	131904854	OpenSea
m1	chr2	131975750	131975771	OpenSea
m1	chr2	133011643	133011849	Island
m1	chr2	133343618	133343657	Shore
m1	chr2	133395195	133395195	OpenSea
m1	chr2	133436288	133436288	OpenSea
m1	chr2	133934804	133934804	OpenSea
m1	chr2	134028440	134028440	Shelf
m1	chr2	134182001	134182001	OpenSea
m1	chr2	134282102	134282102	OpenSea
m1	chr2	135078044	135078044	OpenSea
m1	chr2	135473735	135475426	Shore
m1	chr2	135960123	135960123	OpenSea
m1	chr2	136286684	136286684	Shelf
m1	chr2	136541665	136541665	OpenSea
m1	chr2	136629427	136629427	Shelf
m1	chr2	136740676	136740676	Shelf
m1	chr2	141751626	141751626	OpenSea
m1	chr2	142629557	142629557	OpenSea
m1	chr2	143784002	143784246	OpenSea
m1	chr2	143927903	143927903	OpenSea
m1	chr2	144515038	144515038	OpenSea
m1	chr2	144703795	144703795	OpenSea
m1	chr2	144827306	144827306	OpenSea
m1	chr2	144895454	144895454	OpenSea
m1	chr2	144911452	144911452	OpenSea
m1	chr2	147344230	147344418	Shore
m1	chr2	148606712	148606712	Shelf
m1	chr2	148653986	148653986	OpenSea
m1	chr2	149215431	149216409	OpenSea
m1	chr2	149270531	149270531	OpenSea
m1	chr2	149410331	149410331	OpenSea
m1	chr2	149481321	149481321	OpenSea
m1	chr2	149495671	149495671	OpenSea
m1	chr2	151329752	151329752	OpenSea
m1	chr2	152114699	152114699	Shelf
m1	chr2	152265520	152266230	Shore
m1	chr2	152590396	152591967	OpenSea
m1	chr2	153280733	153280733	OpenSea
m1	chr2	153326947	153326947	OpenSea
m1	chr2	153570634	153570634	Shelf
m1	chr2	153579142	153579142	Shelf
m1	chr2	155101781	155101803	OpenSea
m1	chr2	155711998	155711998	OpenSea
m1	chr2	157181359	157181359	Shelf
m1	chr2	157346486	157346486	OpenSea
m1	chr2	157353685	157353685	OpenSea
m1	chr2	158271449	158271449	OpenSea
m1	chr2	158451668	158451668	Shelf
m1	chr2	158709569	158709569	OpenSea
m1	chr2	158851300	158851594	OpenSea
m1	chr2	158992556	158992556	OpenSea
m1	chr2	159167576	159167576	OpenSea
m1	chr2	159854313	159854313	OpenSea
m1	chr2	159902017	159902017	OpenSea
m1	chr2	160176473	160176473	OpenSea
m1	chr2	160303360	160303360	OpenSea
m1	chr2	160597953	160597953	OpenSea
m1	chr2	160606257	160606257	OpenSea
m1	chr2	160650497	160650497	Shelf
m1	chr2	160713067	160713067	OpenSea
m1	chr2	161052031	161052031	OpenSea
m1	chr2	161137002	161137002	OpenSea
m1	chr2	161194928	161194928	OpenSea
m1	chr2	161206170	161206170	OpenSea
m1	chr2	161273519	161273519	OpenSea
m1	chr2	161283478	161283478	OpenSea
m1	chr2	161342383	161342383	OpenSea
m1	chr2	162047158	162047158	OpenSea
m1	chr2	162062429	162062429	OpenSea
m1	chr2	162064025	162064025	OpenSea
m1	chr2	162168615	162168615	Shelf
m1	chr2	162480565	162481253	OpenSea
m1	chr2	162875880	162875880	OpenSea
m1	chr2	164495258	164495258	OpenSea
m1	chr2	164590272	164590272	Shelf
m1	chr2	165555694	165555937	OpenSea
m1	chr2	165769913	165769913	OpenSea
m1	chr2	166625653	166625653	OpenSea
m1	chr2	166881390	166881390	OpenSea
m1	chr2	167171669	167171669	OpenSea
m1	chr2	167338333	167338333	OpenSea
m1	chr2	168877862	168877862	OpenSea
m1	chr2	168907444	168907444	OpenSea
m1	chr2	168974265	168974265	OpenSea
m1	chr2	169059614	169059614	OpenSea
m1	chr2	169102866	169102929	Shore
m1	chr2	169408033	169408033	OpenSea
m1	chr2	169642729	169643050	OpenSea
m1	chr2	169714050	169714050	OpenSea
m1	chr2	169984729	169984729	OpenSea
m1	chr2	170135359	170135359	OpenSea
m1	chr2	170677497	170677497	Shelf
m1	chr2	170806154	170806154	OpenSea
m1	chr2	172242908	172242908	OpenSea
m1	chr2	172266678	172266678	OpenSea
m1	chr2	172778341	172778343	Shore
m1	chr2	172815385	172815385	OpenSea
m1	chr2	173337636	173337636	OpenSea
m1	chr2	173369204	173369204	OpenSea
m1	chr2	173596515	173596515	Shelf
m1	chr2	173604634	173604634	Shelf
m1	chr2	173989197	173989197	OpenSea
m1	chr2	173999776	173999776	OpenSea
m1	chr2	174015653	174015653	OpenSea
m1	chr2	174074460	174074460	OpenSea
m1	chr2	174132279	174132279	OpenSea
m1	chr2	174228024	174228041	OpenSea
m1	chr2	174233011	174233011	OpenSea
m1	chr2	174788002	174788002	OpenSea
m1	chr2	174949048	174949048	OpenSea
m1	chr2	174970644	174970644	OpenSea
m1	chr2	174980524	174980524	OpenSea
m1	chr2	174996970	174996970	OpenSea
m1	chr2	175300689	175300689	OpenSea
m1	chr2	175436409	175436630	OpenSea
m1	chr2	175693153	175693153	OpenSea
m1	chr2	175816203	175816203	OpenSea
m1	chr2	176793622	176793622	OpenSea
m1	chr2	178788607	178788607	OpenSea
m1	chr2	178981007	178981007	Shelf
m1	chr2	179276662	179276662	Shore
m1	chr2	179281861	179281861	Shelf
m1	chr2	179319711	179319711	Shelf
m1	chr2	179328668	179328668	OpenSea
m1	chr2	179369327	179369327	OpenSea
m1	chr2	179660605	179660605	OpenSea
m1	chr2	180457494	180457494	OpenSea
m1	chr2	180487919	180487919	OpenSea
m1	chr2	180613571	180613571	OpenSea
m1	chr2	181884064	181884064	OpenSea
m1	chr2	181925401	181925401	OpenSea
m1	chr2	182361913	182361913	OpenSea
m1	chr2	182774636	182774636	OpenSea
m1	chr2	182982011	182982011	OpenSea
m1	chr2	183584043	183584043	Shelf
m1	chr2	183642235	183642235	OpenSea
m1	chr2	183880090	183880090	OpenSea
m1	chr2	183888544	183888544	OpenSea
m1	chr2	183963421	183963421	OpenSea
m1	chr2	187600566	187600566	OpenSea
m1	chr2	187627984	187627984	OpenSea
m1	chr2	189237094	189237094	OpenSea
m1	chr2	189305149	189305149	OpenSea
m1	chr2	189342693	189342693	OpenSea
m1	chr2	189897254	189897254	OpenSea
m1	chr2	189981405	189981405	OpenSea
m1	chr2	190045990	190045990	OpenSea
m1	chr2	190611870	190611870	OpenSea
m1	chr2	190688351	190688351	Shore
m1	chr2	190719470	190719470	OpenSea
m1	chr2	190923520	190923520	OpenSea
m1	chr2	191069680	191069680	OpenSea
m1	chr2	191164962	191164962	OpenSea
m1	chr2	191212964	191212964	Shelf
m1	chr2	191859930	191859930	OpenSea
m1	chr2	192223280	192223280	OpenSea
m1	chr2	192229245	192229245	OpenSea
m1	chr2	196570925	196570925	OpenSea
m1	chr2	196642630	196642673	OpenSea
m1	chr2	197001634	197001634	OpenSea
m1	chr2	197024904	197024904	OpenSea
m1	chr2	197597350	197597350	OpenSea
m1	chr2	198272801	198272801	OpenSea
m1	chr2	198283608	198283608	OpenSea
m1	chr2	198649727	198649727	Shore
m1	chr2	200791045	200791045	OpenSea
m1	chr2	201305436	201305436	OpenSea
m1	chr2	201448619	201450506	Shore
m1	chr2	201735780	201735780	OpenSea
m1	chr2	201768554	201768554	OpenSea
m1	chr2	202065750	202065750	OpenSea
m1	chr2	202345075	202345075	OpenSea
m1	chr2	202503750	202503750	Shelf
m1	chr2	202510866	202510866	Shelf
m1	chr2	202669896	202669902	OpenSea
m1	chr2	203633732	203633732	OpenSea
m1	chr2	203926405	203926405	OpenSea
m1	chr2	203999871	203999871	OpenSea
m1	chr2	204737672	204737672	OpenSea
m1	chr2	205520167	205520167	OpenSea
m1	chr2	205546112	205546112	OpenSea
m1	chr2	205591269	205591269	OpenSea
m1	chr2	205728404	205728404	OpenSea
m1	chr2	206132371	206132371	OpenSea
m1	chr2	206162779	206162779	OpenSea
m1	chr2	206188504	206188504	OpenSea
m1	chr2	206865141	206865141	OpenSea
m1	chr2	206981412	206981667	OpenSea
m1	chr2	207040811	207041464	OpenSea
m1	chr2	207042563	207042563	OpenSea
m1	chr2	207147089	207147089	OpenSea
m1	chr2	207511246	207511246	Shelf
m1	chr2	207958145	207958145	OpenSea
m1	chr2	208741349	208741349	OpenSea
m1	chr2	208756199	208756199	OpenSea
m1	chr2	208994373	208994720	OpenSea
m1	chr2	209025539	209025539	OpenSea
m1	chr2	210673825	210673825	Shore
m1	chr2	210840833	210840859	OpenSea
m1	chr2	210994670	210994670	OpenSea
m1	chr2	211168547	211168547	OpenSea
m1	chr2	211340637	211341126	Shore
m1	chr2	211344378	211344378	Shelf
m1	chr2	211480881	211480881	OpenSea
m1	chr2	212938740	212938740	OpenSea
m1	chr2	214182538	214182538	OpenSea
m1	chr2	215593361	215593361	OpenSea
m1	chr2	216249662	216249662	OpenSea
m1	chr2	216260832	216260832	OpenSea
m1	chr2	216298121	216298121	Shelf
m1	chr2	217045817	217045817	OpenSea
m1	chr2	217220696	217220696	OpenSea
m1	chr2	217234404	217234404	Shore
m1	chr2	218438884	218438884	OpenSea
m1	chr2	218621320	218621497	Island
m1	chr2	218678534	218678534	OpenSea
m1	chr2	219251771	219251771	Shore
m1	chr2	219381537	219381537	OpenSea
m1	chr2	219429905	219429905	Shelf
m1	chr2	219649224	219649224	Shelf
m1	chr2	219738226	219738732	Island
m1	chr2	219879552	219880055	OpenSea
m1	chr2	219906404	219907225	Shore
m1	chr2	219989959	219989959	OpenSea
m1	chr2	220250440	220250440	Shore
m1	chr2	220384841	220384841	Shelf
m1	chr2	220413933	220413933	Shore
m1	chr2	222432475	222432475	Shelf
m1	chr2	223538875	223538875	Shelf
m1	chr2	223916502	223916952	Shore
m1	chr2	224698433	224698433	Shelf
m1	chr2	225363361	225363361	OpenSea
m1	chr2	225378351	225378351	OpenSea
m1	chr2	225445666	225445666	Shelf
m1	chr2	225748136	225748136	OpenSea
m1	chr2	226443736	226443736	Shelf
m1	chr2	227662083	227664911	Island
m1	chr2	227757200	227757200	OpenSea
m1	chr2	227871081	227871081	OpenSea
m1	chr2	228093069	228093069	OpenSea
m1	chr2	228475395	228475395	OpenSea
m1	chr2	228497892	228497892	OpenSea
m1	chr2	228498941	228499328	OpenSea
m1	chr2	228563983	228564308	OpenSea
m1	chr2	228681090	228681090	OpenSea
m1	chr2	230662965	230662965	OpenSea
m1	chr2	230783852	230783852	Shelf
m1	chr2	230821547	230821547	OpenSea
m1	chr2	231268327	231268327	OpenSea
m1	chr2	231585649	231585649	OpenSea
m1	chr2	231677809	231677809	OpenSea
m1	chr2	231684443	231684443	OpenSea
m1	chr2	231920892	231921295	Shore
m1	chr2	231967331	231967331	OpenSea
m1	chr2	231991017	231991017	OpenSea
m1	chr2	232025074	232025074	OpenSea
m1	chr2	232263030	232263534	Island
m1	chr2	232265004	232265084	Shore
m1	chr2	232855137	232855137	OpenSea
m1	chr2	233565164	233565164	Shelf
m1	chr2	233632281	233632281	OpenSea
m1	chr2	233722726	233722726	OpenSea
m1	chr2	233736931	233736931	Shelf
m1	chr2	233744073	233744073	Shelf
m1	chr2	233768377	233768377	Shelf
m1	chr2	234369787	234370070	Island
m1	chr2	234386055	234386652	Shore
m1	chr2	234389140	234389140	Shelf
m1	chr2	234745500	234745500	OpenSea
m1	chr2	234749818	234750116	OpenSea
m1	chr2	234848156	234848156	Shore
m1	chr2	235863365	235863589	Shore
m1	chr2	235883655	235883680	OpenSea
m1	chr2	235914787	235914787	OpenSea
m1	chr2	235947655	235947655	Shelf
m1	chr2	236404028	236404028	Shore
m1	chr2	236407361	236407361	Shelf
m1	chr2	236444202	236445373	Shore
m1	chr2	236486327	236486625	OpenSea
m1	chr2	236539528	236539618	OpenSea
m1	chr2	236574643	236574643	Shelf
m1	chr2	236580208	236580208	Shore
m1	chr2	236619304	236619825	OpenSea
m1	chr2	236715747	236716372	OpenSea
m1	chr2	236765874	236765874	OpenSea
m1	chr2	236773924	236774071	Island
m1	chr2	236826207	236826485	OpenSea
m1	chr2	236845381	236845381	OpenSea
m1	chr2	236867836	236867836	Island
m1	chr2	236962206	236962206	OpenSea
m1	chr2	237010222	237010430	Island
m1	chr2	237026123	237026123	Shelf
m1	chr2	237028849	237029101	Island
m1	chr2	237128101	237128101	OpenSea
m1	chr2	237997238	237997238	Shelf
m1	chr2	238305427	238305427	OpenSea
m1	chr2	238535538	238535538	Shore
m1	chr2	238621313	238621429	OpenSea
m1	chr2	238644583	238644583	Shore
m1	chr2	238657876	238657905	OpenSea
m1	chr2	238706175	238706175	Shore
m1	chr2	238904315	238904315	OpenSea
m1	chr2	239034264	239034264	Shelf
m1	chr2	239079168	239079215	OpenSea
m1	chr2	239147445	239147445	Shore
m1	chr2	239237348	239237692	OpenSea
m1	chr2	239309030	239309030	OpenSea
m1	chr2	239339402	239339402	Shelf
m1	chr2	240018022	240018022	OpenSea
m1	chr2	240035107	240035107	Shore
m1	chr2	240105083	240105096	Shelf
m1	chr2	240181892	240181948	OpenSea
m1	chr2	240196769	240196996	Island
m1	chr2	240197131	240197131	Shore
m1	chr2	240212763	240213875	OpenSea
m1	chr2	240251238	240251238	OpenSea
m1	chr2	241069873	241070823	Shore
m1	chr2	241072063	241072063	Shelf
m1	chr2	241380248	241380248	Shelf
m1	chr2	241457438	241457438	Shelf
m1	chr2	241497663	241498962	Shore
m1	chr2	241653301	241653301	OpenSea
m1	chr2	241714550	241714550	Shelf
m1	chr2	241717123	241717598	Island
m1	chr2	241974917	241976244	Island
m1	chr2	242051650	242051808	OpenSea
m1	chr2	242084767	242084767	Shelf
m1	chr2	242101289	242101289	OpenSea
m1	chr2	242144684	242144684	Shelf
m1	chr2	242571652	242571652	Shore
m1	chr2	242602335	242602335	Shelf
m1	chr2	242607778	242608276	Shore
m1	chr2	242646244	242646244	Shelf
m1	chr2	242661748	242663243	Shore
m1	chr2	242663548	242663858	Island
m1	chr2	242668197	242668197	Shelf
m1	chr2	242750355	242751949	Shelf
m1	chr2	242752475	242752746	Shore
m1	chr2	242754333	242754596	Island
m1	chr2	242754756	242755350	Shore
m1	chr2	242756029	242756362	Island
m1	chr2	242757444	242757618	Island
m1	chr2	242811149	242812631	Shelf
m1	chr3	1202463	1202463	OpenSea
m1	chr3	2319891	2319891	OpenSea
m1	chr3	3135232	3135242	OpenSea
m1	chr3	4474632	4474632	OpenSea
m1	chr3	4791251	4791251	OpenSea
m1	chr3	5254757	5254757	OpenSea
m1	chr3	8550753	8550753	OpenSea
m1	chr3	8979651	8979651	OpenSea
m1	chr3	9246501	9246501	OpenSea
m1	chr3	9471176	9471176	OpenSea
m1	chr3	9877266	9877266	OpenSea
m1	chr3	9973478	9973478	Shore
m1	chr3	10276026	10276383	Island
m1	chr3	10294832	10294832	Shelf
m1	chr3	10805956	10806370	OpenSea
m1	chr3	11062724	11062724	Shelf
m1	chr3	11293681	11294604	OpenSea
m1	chr3	11519599	11519911	OpenSea
m1	chr3	11610138	11610338	Island
m1	chr3	11655466	11655466	OpenSea
m1	chr3	11680536	11680536	Shelf
m1	chr3	11744933	11746491	Shore
m1	chr3	11749113	11749113	Shelf
m1	chr3	11884548	11884548	Shelf
m1	chr3	12332780	12332780	Shelf
m1	chr3	12435731	12435731	OpenSea
m1	chr3	12875605	12875605	OpenSea
m1	chr3	12941421	12942355	Shore
m1	chr3	12986097	12986097	OpenSea
m1	chr3	13113959	13114570	Shore
m1	chr3	13114681	13115168	Island
m1	chr3	13522740	13522740	Shore
m1	chr3	13677231	13678918	Shore
m1	chr3	13860204	13860204	Shore
m1	chr3	14239644	14239644	OpenSea
m1	chr3	14974943	14974943	OpenSea
m1	chr3	15251896	15251896	Shelf
m1	chr3	15359338	15359338	OpenSea
m1	chr3	15466687	15466687	Shelf
m1	chr3	15792635	15792635	OpenSea
m1	chr3	15897629	15897629	Shelf
m1	chr3	16271108	16271108	OpenSea
m1	chr3	16305290	16306055	Shore
m1	chr3	16467544	16467726	OpenSea
m1	chr3	16646058	16646058	Island
m1	chr3	16646287	16646375	Shore
m1	chr3	17073703	17073703	OpenSea
m1	chr3	19191785	19191785	Shore
m1	chr3	19440409	19440409	OpenSea
m1	chr3	21558209	21558209	OpenSea
m1	chr3	23415040	23415040	OpenSea
m1	chr3	23448023	23448023	OpenSea
m1	chr3	23894233	23894233	OpenSea
m1	chr3	24518076	24518076	OpenSea
m1	chr3	26663551	26663885	Shore
m1	chr3	27395329	27395329	OpenSea
m1	chr3	27411746	27411790	Shore
m1	chr3	27498161	27499075	OpenSea
m1	chr3	29344151	29344151	OpenSea
m1	chr3	29563260	29563260	OpenSea
m1	chr3	29668578	29668578	OpenSea
m1	chr3	29760704	29760704	OpenSea
m1	chr3	29967204	29967204	OpenSea
m1	chr3	30045896	30045896	OpenSea
m1	chr3	30933751	30933751	Shelf
m1	chr3	31667141	31667141	OpenSea
m1	chr3	31763271	31763271	OpenSea
m1	chr3	31875376	31875376	OpenSea
m1	chr3	31975169	31975169	OpenSea
m1	chr3	32208500	32208500	OpenSea
m1	chr3	32541698	32541698	Shelf
m1	chr3	32567949	32567949	OpenSea
m1	chr3	32863439	32864307	Shore
m1	chr3	32995957	32996372	OpenSea
m1	chr3	33046213	33046213	OpenSea
m1	chr3	33444388	33444388	OpenSea
m1	chr3	33841973	33841973	Shore
m1	chr3	33842675	33842675	Shelf
m1	chr3	35706038	35706161	OpenSea
m1	chr3	36778755	36779043	OpenSea
m1	chr3	36902435	36903038	OpenSea
m1	chr3	37055414	37055414	OpenSea
m1	chr3	37332133	37332133	OpenSea
m1	chr3	37860954	37860954	OpenSea
m1	chr3	39306129	39306129	OpenSea
m1	chr3	39423954	39424144	Shore
m1	chr3	40519626	40519626	Shore
m1	chr3	41248452	41248452	OpenSea
m1	chr3	41289931	41289931	OpenSea
m1	chr3	41361925	41361925	OpenSea
m1	chr3	41996898	41997107	OpenSea
m1	chr3	42190778	42191047	OpenSea
m1	chr3	42672763	42672763	OpenSea
m1	chr3	42700108	42700354	Island
m1	chr3	42775696	42775696	OpenSea
m1	chr3	42828766	42828766	OpenSea
m1	chr3	42850066	42850066	Shelf
m1	chr3	43024660	43024660	Shelf
m1	chr3	43033200	43033200	OpenSea
m1	chr3	43566186	43566186	OpenSea
m1	chr3	43579949	43579949	OpenSea
m1	chr3	43626312	43626312	OpenSea
m1	chr3	43664647	43664647	Shore
m1	chr3	43739515	43739515	OpenSea
m1	chr3	44287310	44287310	Shelf
m1	chr3	44496780	44496780	OpenSea
m1	chr3	44612961	44612961	OpenSea
m1	chr3	44686309	44686309	Shelf
m1	chr3	44776364	44776364	OpenSea
m1	chr3	44914671	44914870	OpenSea
m1	chr3	45185028	45185028	Shore
m1	chr3	45797767	45797767	OpenSea
m1	chr3	45866619	45866619	OpenSea
m1	chr3	45989744	45990547	OpenSea
m1	chr3	46504469	46506104	Shore
m1	chr3	46506206	46506404	Island
m1	chr3	46506481	46506554	Shore
m1	chr3	46742865	46743078	Island
m1	chr3	46899455	46899455	OpenSea
m1	chr3	46906118	46906385	OpenSea
m1	chr3	46940153	46940347	Island
m1	chr3	46977532	46977532	OpenSea
m1	chr3	47191823	47191823	OpenSea
m1	chr3	47359949	47359949	OpenSea
m1	chr3	47619041	47619041	Shore
m1	chr3	48111329	48111329	OpenSea
m1	chr3	48369177	48369810	OpenSea
m1	chr3	48465017	48465320	OpenSea
m1	chr3	48466700	48467983	Shelf
m1	chr3	48484191	48484191	Shelf
m1	chr3	48510438	48510438	OpenSea
m1	chr3	48593395	48593844	Shore
m1	chr3	49158491	49158709	Shore
m1	chr3	49193200	49193200	OpenSea
m1	chr3	49757438	49758394	Shore
m1	chr3	50196135	50196278	Shelf
m1	chr3	50328104	50329297	Shore
m1	chr3	50350760	50350790	OpenSea
m1	chr3	50486444	50486444	OpenSea
m1	chr3	50487955	50488230	OpenSea
m1	chr3	52485216	52485216	OpenSea
m1	chr3	52486691	52486691	Shelf
m1	chr3	52552868	52553049	Island
m1	chr3	52583646	52583646	OpenSea
m1	chr3	52923468	52923468	OpenSea
m1	chr3	53003348	53003497	OpenSea
m1	chr3	53161967	53161967	Shelf
m1	chr3	53213700	53213815	OpenSea
m1	chr3	53566044	53566044	OpenSea
m1	chr3	53878642	53878642	Shore
m1	chr3	53922675	53922675	Shelf
m1	chr3	54331304	54331304	OpenSea
m1	chr3	54353131	54353131	OpenSea
m1	chr3	54634169	54634169	OpenSea
m1	chr3	54660934	54660934	Shore
m1	chr3	54704963	54704963	OpenSea
m1	chr3	54744506	54744506	OpenSea
m1	chr3	54913073	54913073	OpenSea
m1	chr3	54935724	54935724	OpenSea
m1	chr3	55508379	55508686	Island
m1	chr3	55510396	55510396	Shore
m1	chr3	55809537	55809537	OpenSea
m1	chr3	55908649	55908649	OpenSea
m1	chr3	55926920	55926920	OpenSea
m1	chr3	55931466	55931466	OpenSea
m1	chr3	56337073	56337073	OpenSea
m1	chr3	56713650	56713650	Shelf
m1	chr3	56797995	56797995	OpenSea
m1	chr3	57125501	57125501	OpenSea
m1	chr3	57130436	57130436	Shore
m1	chr3	57186283	57186283	OpenSea
m1	chr3	57745962	57745962	Shelf
m1	chr3	57997675	57997675	Shelf
m1	chr3	58225528	58225528	Shore
m1	chr3	58257920	58257920	OpenSea
m1	chr3	58852325	58852325	OpenSea
m1	chr3	59960363	59960363	OpenSea
m1	chr3	59983787	59983787	OpenSea
m1	chr3	61558087	61558087	OpenSea
m1	chr3	61608199	61608199	OpenSea
m1	chr3	61656598	61656598	OpenSea
m1	chr3	61704607	61704607	OpenSea
m1	chr3	61754981	61754981	OpenSea
m1	chr3	61782945	61782945	OpenSea
m1	chr3	61880295	61880295	OpenSea
m1	chr3	61940979	61940979	OpenSea
m1	chr3	61970063	61970063	OpenSea
m1	chr3	62008370	62008370	OpenSea
m1	chr3	63895733	63897274	Shore
m1	chr3	63943755	63943755	OpenSea
m1	chr3	63988378	63988378	OpenSea
m1	chr3	64128942	64128942	OpenSea
m1	chr3	64559102	64559102	OpenSea
m1	chr3	65340538	65340538	Shore
m1	chr3	65364705	65364705	Shore
m1	chr3	65453516	65453516	OpenSea
m1	chr3	65538667	65538667	Shelf
m1	chr3	65619088	65619088	OpenSea
m1	chr3	65841429	65841429	OpenSea
m1	chr3	65864381	65864381	OpenSea
m1	chr3	65880266	65880266	OpenSea
m1	chr3	66468921	66468921	OpenSea
m1	chr3	67511061	67511061	OpenSea
m1	chr3	69157839	69157839	OpenSea
m1	chr3	69160779	69160779	OpenSea
m1	chr3	69390063	69390063	OpenSea
m1	chr3	69859618	69859618	OpenSea
m1	chr3	69927701	69928509	OpenSea
m1	chr3	69974592	69974592	OpenSea
m1	chr3	69990481	69990481	OpenSea
m1	chr3	71203748	71203748	OpenSea
m1	chr3	71216678	71217277	OpenSea
m1	chr3	71245529	71245529	OpenSea
m1	chr3	71247280	71247442	OpenSea
m1	chr3	71277910	71277910	OpenSea
m1	chr3	71600114	71600114	OpenSea
m1	chr3	71820909	71820909	OpenSea
m1	chr3	72839466	72839466	OpenSea
m1	chr3	72888487	72888487	OpenSea
m1	chr3	72976561	72976561	Shore
m1	chr3	73111175	73112133	OpenSea
m1	chr3	73432452	73432452	Shore
m1	chr3	73468875	73468875	OpenSea
m1	chr3	73523729	73523729	OpenSea
m1	chr3	73591147	73591147	OpenSea
m1	chr3	73641305	73641305	OpenSea
m1	chr3	74571266	74571266	OpenSea
m1	chr3	75832003	75832003	Shelf
m1	chr3	77122541	77122541	OpenSea
m1	chr3	77143393	77143393	Shelf
m1	chr3	77145918	77147109	Shore
m1	chr3	77558000	77558000	OpenSea
m1	chr3	78693312	78693312	OpenSea
m1	chr3	79006791	79006791	OpenSea
m1	chr3	79026069	79026069	OpenSea
m1	chr3	79079292	79079292	OpenSea
m1	chr3	79378041	79378041	OpenSea
m1	chr3	85008991	85010677	Shore
m1	chr3	85042454	85042454	OpenSea
m1	chr3	85071786	85071786	OpenSea
m1	chr3	85140079	85140079	OpenSea
m1	chr3	85178247	85178247	OpenSea
m1	chr3	87036080	87036080	Shelf
m1	chr3	88030644	88031773	OpenSea
m1	chr3	88188026	88188285	OpenSea
m1	chr3	89350961	89350961	OpenSea
m1	chr3	93646378	93646432	OpenSea
m1	chr3	93733689	93733689	OpenSea
m1	chr3	93773657	93773657	OpenSea
m1	chr3	93780328	93780446	Shore
m1	chr3	94656733	94657048	Island
m1	chr3	94659317	94659317	Shelf
m1	chr3	97663514	97663926	OpenSea
m1	chr3	97741670	97741670	OpenSea
m1	chr3	98072423	98072423	OpenSea
m1	chr3	98189197	98189197	OpenSea
m1	chr3	98234845	98234845	OpenSea
m1	chr3	98612083	98612083	OpenSea
m1	chr3	99566949	99567697	OpenSea
m1	chr3	99579802	99579802	OpenSea
m1	chr3	99752916	99752916	OpenSea
m1	chr3	99776071	99776071	OpenSea
m1	chr3	99794010	99794010	OpenSea
m1	chr3	99795240	99795240	OpenSea
m1	chr3	99834752	99834752	OpenSea
m1	chr3	99905910	99905910	OpenSea
m1	chr3	100029709	100029709	OpenSea
m1	chr3	100468242	100468242	OpenSea
m1	chr3	100516031	100516031	OpenSea
m1	chr3	100945574	100945574	OpenSea
m1	chr3	101039372	101039920	OpenSea
m1	chr3	101044447	101044447	OpenSea
m1	chr3	101405733	101406543	Shore
m1	chr3	101579557	101579557	OpenSea
m1	chr3	103930387	103930387	OpenSea
m1	chr3	106966359	106966359	OpenSea
m1	chr3	106967365	106967663	OpenSea
m1	chr3	107095499	107095499	OpenSea
m1	chr3	107348775	107348775	OpenSea
m1	chr3	107567901	107567901	OpenSea
m1	chr3	108101406	108101406	OpenSea
m1	chr3	108115132	108115132	OpenSea
m1	chr3	108310912	108310912	Shelf
m1	chr3	108672412	108672872	OpenSea
m1	chr3	109033890	109033890	OpenSea
m1	chr3	110831177	110831177	OpenSea
m1	chr3	111315207	111315207	OpenSea
m1	chr3	111450718	111451470	OpenSea
m1	chr3	111574819	111574819	Shelf
m1	chr3	111717534	111718457	OpenSea
m1	chr3	111760010	111760098	OpenSea
m1	chr3	111916760	111916760	OpenSea
m1	chr3	112276088	112276088	Shelf
m1	chr3	112948716	112948716	OpenSea
m1	chr3	112973542	112973542	OpenSea
m1	chr3	113015910	113015910	OpenSea
m1	chr3	113157476	113157476	Shelf
m1	chr3	113163068	113163068	Shelf
m1	chr3	113230941	113230941	Shelf
m1	chr3	113599916	113599916	Shelf
m1	chr3	113683598	113683598	OpenSea
m1	chr3	113777680	113777680	Shelf
m1	chr3	113953856	113953856	OpenSea
m1	chr3	114035416	114036631	OpenSea
m1	chr3	114066865	114066865	Shelf
m1	chr3	114649328	114649487	OpenSea
m1	chr3	114862175	114862175	Shelf
m1	chr3	115553845	115553845	OpenSea
m1	chr3	115632345	115632345	OpenSea
m1	chr3	118676357	118676357	OpenSea
m1	chr3	119123583	119123583	Shelf
m1	chr3	119150634	119150634	OpenSea
m1	chr3	119180915	119180915	OpenSea
m1	chr3	119211339	119211339	OpenSea
m1	chr3	119425176	119425176	Shelf
m1	chr3	120046754	120046754	OpenSea
m1	chr3	120170646	120170646	Shore
m1	chr3	120412084	120412084	OpenSea
m1	chr3	120449890	120449890	OpenSea
m1	chr3	122142474	122142474	OpenSea
m1	chr3	122279522	122279522	Shelf
m1	chr3	122333034	122333057	OpenSea
m1	chr3	122604506	122605355	OpenSea
m1	chr3	122642571	122642571	Shore
m1	chr3	122712138	122712717	OpenSea
m1	chr3	122720612	122720612	OpenSea
m1	chr3	122928186	122928186	OpenSea
m1	chr3	123138250	123139305	OpenSea
m1	chr3	123335578	123335578	OpenSea
m1	chr3	123509516	123509516	OpenSea
m1	chr3	123518635	123518635	OpenSea
m1	chr3	123632556	123632556	OpenSea
m1	chr3	123699293	123699293	OpenSea
m1	chr3	123812381	123813596	OpenSea
m1	chr3	124102766	124103696	OpenSea
m1	chr3	124239629	124239629	OpenSea
m1	chr3	124303555	124304033	Island
m1	chr3	124448651	124449152	Shore
m1	chr3	124520019	124520019	OpenSea
m1	chr3	124607120	124607120	Shore
m1	chr3	124652790	124653718	OpenSea
m1	chr3	124912499	124912499	OpenSea
m1	chr3	124913784	124913784	OpenSea
m1	chr3	125037763	125037763	OpenSea
m1	chr3	125197837	125197837	OpenSea
m1	chr3	125248264	125248264	OpenSea
m1	chr3	125258584	125258584	OpenSea
m1	chr3	125775413	125776338	OpenSea
m1	chr3	126066447	126066447	Shelf
m1	chr3	126072941	126074601	Shore
m1	chr3	126158866	126158866	OpenSea
m1	chr3	126203813	126203813	OpenSea
m1	chr3	126665084	126665084	Shelf
m1	chr3	126679199	126679199	OpenSea
m1	chr3	127468611	127468611	OpenSea
m1	chr3	127543493	127543493	Shore
m1	chr3	127641373	127642355	OpenSea
m1	chr3	127840234	127840234	Shelf
m1	chr3	127873057	127873057	Shore
m1	chr3	128118189	128118254	OpenSea
m1	chr3	128602077	128602077	Shelf
m1	chr3	128738901	128738901	OpenSea
m1	chr3	129018763	129018763	OpenSea
m1	chr3	129129569	129129921	OpenSea
m1	chr3	129376466	129376466	OpenSea
m1	chr3	130394849	130394849	OpenSea
m1	chr3	131083585	131083585	Shelf
m1	chr3	131341698	131341698	OpenSea
m1	chr3	131388542	131388542	OpenSea
m1	chr3	132374847	132374847	Shelf
m1	chr3	133115942	133115942	OpenSea
m1	chr3	133375668	133375668	OpenSea
m1	chr3	133381208	133381417	Shore
m1	chr3	133464971	133465360	Island
m1	chr3	133527122	133527122	Shore
m1	chr3	133527210	133527210	Shelf
m1	chr3	134074767	134074767	OpenSea
m1	chr3	134282543	134282543	OpenSea
m1	chr3	135741936	135741936	OpenSea
m1	chr3	136192388	136192388	OpenSea
m1	chr3	137725933	137725933	Shelf
m1	chr3	138309376	138309376	Shelf
m1	chr3	138341122	138341122	OpenSea
m1	chr3	138668832	138669322	Island
m1	chr3	139257713	139258730	Island
m1	chr3	140401543	140401955	Island
m1	chr3	140664727	140664727	Shelf
m1	chr3	140696586	140696586	OpenSea
m1	chr3	140786121	140786121	Shore
m1	chr3	140813919	140814133	Island
m1	chr3	140834386	140834386	OpenSea
m1	chr3	141139991	141139991	OpenSea
m1	chr3	141715967	141715967	OpenSea
m1	chr3	141877942	141877942	OpenSea
m1	chr3	142318115	142318115	Shelf
m1	chr3	142361468	142361468	OpenSea
m1	chr3	142447949	142447949	Shelf
m1	chr3	142526350	142526350	OpenSea
m1	chr3	142546545	142546545	OpenSea
m1	chr3	142741875	142741875	OpenSea
m1	chr3	143501281	143501281	OpenSea
m1	chr3	143703954	143703954	OpenSea
m1	chr3	145969579	145970385	Shore
m1	chr3	146191384	146191384	Shelf
m1	chr3	146241314	146241314	OpenSea
m1	chr3	148450860	148450860	OpenSea
m1	chr3	148545789	148545789	OpenSea
m1	chr3	148581801	148581837	OpenSea
m1	chr3	148851525	148851525	Shelf
m1	chr3	148905466	148905466	OpenSea
m1	chr3	149247133	149247133	OpenSea
m1	chr3	149281123	149281123	OpenSea
m1	chr3	149370950	149370950	Shelf
m1	chr3	149536976	149536976	OpenSea
m1	chr3	150134309	150134309	OpenSea
m1	chr3	150146051	150146051	OpenSea
m1	chr3	150917888	150917888	OpenSea
m1	chr3	150930072	150930072	OpenSea
m1	chr3	150933460	150933460	OpenSea
m1	chr3	150975957	150975957	OpenSea
m1	chr3	151035780	151035969	OpenSea
m1	chr3	151072858	151073249	OpenSea
m1	chr3	151996146	151996146	OpenSea
m1	chr3	152067880	152067880	OpenSea
m1	chr3	153898958	153898958	OpenSea
m1	chr3	153974050	153974050	OpenSea
m1	chr3	154039997	154039997	Shelf
m1	chr3	155314068	155314068	OpenSea
m1	chr3	155607265	155607265	OpenSea
m1	chr3	155925405	155925405	OpenSea
m1	chr3	156084754	156084754	OpenSea
m1	chr3	156559505	156559505	OpenSea
m1	chr3	156977642	156977642	OpenSea
m1	chr3	157152139	157152139	Shelf
m1	chr3	157158577	157158577	Shelf
m1	chr3	158315980	158315980	OpenSea
m1	chr3	158410264	158410264	OpenSea
m1	chr3	158541027	158541027	OpenSea
m1	chr3	158547325	158547325	OpenSea
m1	chr3	159557552	159558031	OpenSea
m1	chr3	159614993	159614993	OpenSea
m1	chr3	159713351	159713351	OpenSea
m1	chr3	160092111	160092111	OpenSea
m1	chr3	160121821	160122503	Shelf
m1	chr3	160502317	160502317	OpenSea
m1	chr3	160513327	160513327	OpenSea
m1	chr3	160580235	160580380	OpenSea
m1	chr3	160611917	160611917	OpenSea
m1	chr3	161065381	161065381	OpenSea
m1	chr3	161086943	161086943	Shelf
m1	chr3	167033938	167033938	OpenSea
m1	chr3	167172692	167172692	OpenSea
m1	chr3	167185752	167185752	OpenSea
m1	chr3	167190158	167190158	OpenSea
m1	chr3	167191837	167191873	OpenSea
m1	chr3	168524260	168524260	OpenSea
m1	chr3	168801790	168802733	OpenSea
m1	chr3	169006475	169006475	OpenSea
m1	chr3	169629136	169629516	OpenSea
m1	chr3	169798180	169798180	OpenSea
m1	chr3	169801806	169801806	OpenSea
m1	chr3	169942945	169942945	Shelf
m1	chr3	169975155	169975155	OpenSea
m1	chr3	170183336	170183336	OpenSea
m1	chr3	170211425	170211425	OpenSea
m1	chr3	170584266	170584266	Shelf
m1	chr3	170609282	170609282	OpenSea
m1	chr3	170623410	170623410	Shelf
m1	chr3	170714485	170714485	OpenSea
m1	chr3	170716743	170716743	OpenSea
m1	chr3	170744540	170746029	Shore
m1	chr3	170781531	170781531	OpenSea
m1	chr3	170983841	170983841	OpenSea
m1	chr3	171559851	171560011	OpenSea
m1	chr3	171791143	171791143	OpenSea
m1	chr3	171875690	171875690	OpenSea
m1	chr3	171897151	171897151	OpenSea
m1	chr3	171921695	171921695	OpenSea
m1	chr3	171930178	171930178	OpenSea
m1	chr3	171976122	171976122	OpenSea
m1	chr3	172018688	172018688	OpenSea
m1	chr3	172037094	172037094	OpenSea
m1	chr3	172083178	172083178	OpenSea
m1	chr3	172367191	172367191	OpenSea
m1	chr3	172721275	172721275	OpenSea
m1	chr3	172858390	172859699	OpenSea
m1	chr3	173438075	173438075	OpenSea
m1	chr3	173583617	173583617	OpenSea
m1	chr3	173632551	173632551	OpenSea
m1	chr3	174648902	174648902	OpenSea
m1	chr3	174722125	174722125	OpenSea
m1	chr3	174792068	174792068	OpenSea
m1	chr3	175114259	175114259	OpenSea
m1	chr3	175338261	175338908	OpenSea
m1	chr3	176763896	176763896	OpenSea
m1	chr3	176794214	176794214	OpenSea
m1	chr3	178742639	178742639	OpenSea
m1	chr3	178969395	178970966	OpenSea
m1	chr3	178983283	178983283	Shelf
m1	chr3	179052406	179052406	OpenSea
m1	chr3	179115547	179115547	OpenSea
m1	chr3	179318612	179318612	Shelf
m1	chr3	179373956	179373956	Shelf
m1	chr3	179390381	179390381	OpenSea
m1	chr3	179501588	179502686	OpenSea
m1	chr3	179518806	179518806	OpenSea
m1	chr3	179543581	179543581	OpenSea
m1	chr3	179570683	179570683	OpenSea
m1	chr3	180328345	180328345	OpenSea
m1	chr3	180332054	180332054	OpenSea
m1	chr3	181404883	181404883	OpenSea
m1	chr3	181437548	181438328	Shore
m1	chr3	182686679	182686679	OpenSea
m1	chr3	182688462	182688462	OpenSea
m1	chr3	182813224	182813224	Shelf
[truncated: 122,158 more rows]

## Sheet: Histone acethylation module
module	chr	start	end
m1	chr1	23502279	23505667
m1	chr1	26259655	26260604
m1	chr1	39728238	39728860
m1	chr1	49381675	49382072
m1	chr1	49413648	49414067
m1	chr1	50488592	50490736
m1	chr1	50573989	50580929
m1	chr1	60279443	60282684
m1	chr1	74969747	74972338
m1	chr1	75138419	75140509
m1	chr1	77230250	77231529
m1	chr1	85219532	85220197
m1	chr1	88424827	88426125
m1	chr1	89996400	89997464
m1	chr1	92494389	92498672
m1	chr1	102460345	102463376
m1	chr1	111211402	111218768
m1	chr1	117189086	117189576
m1	chr1	117457014	117460191
m1	chr1	145071202	145076942
m1	chr1	150251868	150257439
m1	chr1	153760841	153765627
m1	chr1	154596726	154601265
m1	chr1	156375162	156409872
m1	chr1	159110624	159113157
m1	chr1	163037368	163043331
m1	chr1	163144014	163145421
m1	chr1	164667862	164671034
m1	chr1	168367938	168369006
m1	chr1	168407523	168409512
m1	chr1	168578537	168579271
m1	chr1	168939771	168940959
m1	chr1	174415104	174415798
m1	chr1	174911402	174912505
m1	chr1	175709947	175713556
m1	chr1	177138558	177144942
m1	chr1	177149273	177153505
m1	chr1	178357600	178358781
m1	chr1	181109582	181113236
m1	chr1	181147776	181150216
m1	chr1	184473129	184473771
m1	chr1	190441903	190449747
m1	chr1	208404213	208419240
m1	chr1	209393307	209394159
m1	chr1	209756453	209764702
m1	chr1	220862801	220867100
m1	chr1	228643075	228647641
m1	chr1	229471087	229480466
m1	chr1	233116700	233116939
m1	chr1	233765242	233768801
m1	chr1	234870677	234872158
m1	chr1	236045233	236047236
m1	chr1	240286226	240286843
m1	chr1	241307551	241308056
m1	chr1	241799101	241804939
m1	chr10	10334389	10338046
m1	chr10	10503347	10507605
m1	chr10	10838115	10841162
m1	chr10	11045608	11066336
m1	chr10	11204286	11222486
m1	chr10	12525959	12527780
m1	chr10	12541212	12541329
m1	chr10	13042187	13044419
m1	chr10	13726142	13728934
m1	chr10	13744266	13753375
m1	chr10	13759845	13761594
m1	chr10	14368662	14373521
m1	chr10	14421594	14421956
m1	chr10	18549109	18552178
m1	chr10	18688964	18693765
m1	chr10	21283858	21285433
m1	chr10	23352162	23352898
m1	chr10	24807656	24808458
m1	chr10	34405515	34406196
m1	chr10	63723786	63724283
m1	chr10	65625678	65628311
m1	chr10	83632332	83640793
m1	chr10	96989637	96990877
m1	chr10	97332080	97332537
m1	chr10	97334425	97335355
m1	chr10	103070171	103072568
m1	chr10	103090287	103092032
m1	chr10	105035678	105043261
m1	chr10	116760814	116762130
m1	chr10	116851031	116856462
m1	chr10	133108693	133109242
m1	chr11	12178077	12185514
m1	chr11	13228764	13230923
m1	chr11	19756596	19758928
m1	chr11	26353312	26356241
m1	chr11	28588168	28588713
m1	chr11	33396887	33401755
m1	chr11	33639309	33644196
m1	chr11	46048214	46049227
m1	chr11	46527339	46528161
m1	chr11	63645380	63648758
m1	chr11	70670260	70674304
m1	chr11	73306101	73310525
m1	chr11	74108101	74110605
m1	chr11	74153906	74155114
m1	chr11	77120876	77124604
m1	chr11	84146600	84149879
m1	chr11	84429464	84433426
m1	chr11	84632784	84636039
m1	chr11	86259608	86260096
m1	chr11	88795318	88799442
m1	chr11	106317407	106318432
m1	chr11	113767122	113767931
m1	chr11	113941198	113965583
m1	chr11	121318718	121339855
m1	chr11	123394753	123400557
m1	chr11	123956556	123957421
m1	chr11	128889086	128894529
m1	chr11	129144264	129152115
m1	chr11	129182623	129183590
m1	chr11	131779130	131785201
m1	chr11	132779482	132780517
m1	chr11	132947788	132949528
m1	chr11	134142281	134147901
m1	chr12	2849200	2849802
m1	chr12	2892476	2894828
m1	chr12	4921550	4931528
m1	chr12	11860130	11860313
m1	chr12	11869778	11873180
m1	chr12	12185082	12186895
m1	chr12	14108490	14110739
m1	chr12	14123610	14135310
m1	chr12	27577412	27577814
m1	chr12	45228368	45229631
m1	chr12	45265351	45271225
m1	chr12	48689972	48691830
m1	chr12	51826561	51827385
m1	chr12	67197364	67198515
m1	chr12	71147948	71148388
m1	chr12	71311388	71315154
m1	chr12	79257052	79266572
m1	chr12	80793894	80795154
m1	chr12	94579025	94582118
m1	chr12	97856382	97858877
m1	chr12	99138752	99141045
m1	chr12	99540048	99541897
m1	chr12	99546499	99550291
m1	chr12	100375771	100379899
m1	chr12	109456289	109459209
m1	chr12	113238069	113240473
m1	chr12	118403938	118407488
m1	chr12	118496441	118503191
m1	chr12	119417839	119424119
m1	chr12	120236276	120243395
m1	chr12	121592142	121594369
m1	chr12	128245795	128246898
m1	chr12	131115881	131119698
m1	chr12	131299871	131301135
m1	chr13	26062829	26064795
m1	chr13	27504151	27505079
m1	chr13	29393295	29397542
m1	chr13	30002148	30003883
m1	chr13	31596517	31597134
m1	chr13	31628174	31630832
m1	chr13	36427915	36430885
m1	chr13	44833396	44834770
m1	chr13	47465214	47473950
m1	chr13	50194379	50194807
m1	chr13	76334748	76334895
m1	chr13	76378613	76378774
m1	chr13	98823583	98826292
m1	chr13	99665331	99669316
m1	chr13	102961566	102961890
m1	chr13	108215591	108215870
m1	chr13	111836663	111841407
m1	chr13	113622120	113625958
m1	chr14	23395763	23400279
m1	chr14	23646707	23654502
m1	chr14	29223437	29255464
m1	chr14	29859128	29861067
m1	chr14	42070851	42081280
m1	chr14	52313298	52314149
m1	chr14	60093343	60098119
m1	chr14	60173980	60175469
m1	chr14	62582689	62586409
m1	chr14	64930793	64936277
m1	chr14	70026532	70026852
m1	chr14	72398411	72401843
m1	chr14	78635746	78641524
m1	chr14	78869499	78871745
m1	chr14	85993990	86007146
m1	chr14	91077572	91083825
m1	chr14	95068252	95068804
m1	chr14	102779903	102790289
m1	chr15	25726145	25726990
m1	chr15	25914719	25916539
m1	chr15	26273626	26273803
m1	chr15	33482004	33487884
m1	chr15	48482734	48485230
m1	chr15	52026358	52032380
m1	chr15	54269616	54274017
m1	chr15	66160748	66164226
m1	chr15	98064313	98065681
m1	chr15	98195750	98196499
m1	chr16	2917751	2919859
m1	chr16	7351930	7355479
m1	chr16	8806142	8809886
m1	chr16	9979016	9980195
m1	chr16	10174135	10174869
m1	chr16	10214921	10217635
m1	chr16	14050298	14051814
m1	chr16	24266426	24272167
m1	chr16	55945653	55947212
m1	chr16	62332427	62332966
m1	chr16	81553173	81555868
m1	chr16	87550529	87551908
m1	chr17	9921207	9931012
m1	chr17	19988160	19990739
m1	chr17	42785276	42787021
m1	chr17	52976232	52979120
m1	chr17	53340921	53352409
m1	chr17	63674639	63674984
m1	chr17	63899007	63899357
m1	chr17	75230794	75232324
m1	chr17	75652790	75654014
m1	chr17	78568483	78569178
m1	chr18	3839285	3846058
m1	chr18	3867873	3878858
m1	chr18	3992767	3995715
m1	chr18	4449506	4456265
m1	chr18	13372352	13383661
m1	chr18	22067889	22068293
m1	chr18	22123304	22124516
m1	chr18	22305655	22307465
m1	chr18	32696358	32703668
m1	chr18	39324398	39325459
m1	chr18	39486497	39486795
m1	chr18	40853636	40859348
m1	chr18	42595497	42597599
m1	chr18	44339923	44341486
m1	chr18	49147775	49148387
m1	chr18	55861758	55865400
m1	chr18	55914152	55915930
m1	chr18	55924711	55924846
m1	chr18	56114665	56114893
m1	chr18	60845615	60849059
m1	chr18	71615238	71615658
m1	chr19	31765385	31766048
m1	chr19	31805177	31810542
m1	chr19	57527511	57528773
m1	chr2	1857974	1860781
m1	chr2	2190909	2193212
m1	chr2	2233417	2235057
m1	chr2	2322632	2337355
m1	chr2	2616902	2618798
m1	chr2	2659292	2660866
m1	chr2	3260425	3261908
m1	chr2	7094657	7102165
m1	chr2	8842090	8842556
m1	chr2	15874016	15874993
m1	chr2	16829806	16848179
m1	chr2	17698807	17700241
m1	chr2	17719196	17727012
m1	chr2	28447299	28448683
m1	chr2	30902341	30902638
m1	chr2	38264937	38266065
m1	chr2	50569669	50575858
m1	chr2	54516819	54518305
m1	chr2	60795254	60797857
m1	chr2	65591579	65595041
m1	chr2	99060581	99063999
m1	chr2	100721520	100724823
m1	chr2	104642986	104644141
m1	chr2	106192080	106193576
m1	chr2	109422435	109422622
m1	chr2	115200029	115200523
m1	chr2	120452165	120453782
m1	chr2	124781656	124786688
m1	chr2	135939326	135940121
m1	chr2	152827152	152831599
m1	chr2	162480578	162484162
m1	chr2	163692852	163697011
m1	chr2	166982092	166984658
m1	chr2	167004910	167006308
m1	chr2	172862502	172865657
m1	chr2	175634926	175637856
m1	chr2	180293240	180294144
m1	chr2	199181407	199182119
m1	chr2	207138565	207141739
m1	chr2	207233767	207234265
m1	chr2	207306904	207312571
m1	chr2	208939402	208939994
m1	chr2	209048436	209051832
m1	chr2	209053948	209055102
m1	chr2	210636033	210638407
m1	chr2	222475847	222476781
m1	chr2	226264228	226268362
m1	chr2	226894907	226897766
m1	chr2	230131940	230136934
m1	chr2	235397498	235406392
m1	chr20	1303031	1312011
m1	chr20	1862992	1866325
m1	chr20	2109139	2111962
m1	chr20	3385861	3390180
m1	chr20	4661733	4663100
m1	chr20	5712770	5713038
m1	chr20	5890927	5893618
m1	chr20	8112128	8116785
m1	chr20	10151845	10154901
m1	chr20	10196243	10206564
m1	chr20	47956237	47957303
m1	chr20	48095171	48101768
m1	chr20	48121911	48122409
m1	chr20	57721242	57722834
m1	chr20	62959859	62960309
m1	chr21	15399275	15400272
m1	chr21	38629482	38632412
m1	chr21	42211069	42220229
m1	chr22	25959395	25966727
m1	chr22	28430088	28431631
m1	chr22	28448817	28449432
m1	chr22	34189043	34189605
m1	chr22	36230354	36237123
m1	chr22	37093757	37101926
m1	chr3	1134157	1135369
m1	chr3	2552436	2554598
m1	chr3	4532527	4538848
m1	chr3	9285617	9293012
m1	chr3	9321700	9322980
m1	chr3	12044669	12049304
m1	chr3	16551335	16559083
m1	chr3	18411457	18412421
m1	chr3	18455502	18468726
m1	chr3	21786693	21793306
m1	chr3	25468055	25475898
m1	chr3	32001306	32002165
m1	chr3	33925132	33926229
m1	chr3	35676807	35677513
m1	chr3	37945260	37950088
m1	chr3	40427790	40430430
m1	chr3	40656654	40658227
m1	chr3	42112182	42116123
m1	chr3	44060635	44065807
m1	chr3	49435114	49435525
m1	chr3	54277065	54278024
m1	chr3	56807545	56812034
m1	chr3	57008603	57008923
m1	chr3	58810203	58810652
m1	chr3	64201554	64203009
m1	chr3	64204598	64212677
m1	chr3	64249795	64254672
m1	chr3	64312641	64313359
m1	chr3	66138783	66140778
m1	chr3	68053092	68057966
m1	chr3	73605658	73611914
m1	chr3	74660573	74664395
m1	chr3	76359439	76362124
m1	chr3	111717352	111723821
m1	chr3	115230700	115232526
m1	chr3	115341917	115346320
m1	chr3	115411955	115413592
m1	chr3	120134883	120140939
m1	chr3	120275209	120280855
m1	chr3	120626378	120631517
m1	chr3	121311694	121312576
m1	chr3	123813057	123817017
m1	chr3	124102225	124109510
m1	chr3	127462431	127464177
m1	chr3	127633271	127636308
m1	chr3	138046711	138051807
m1	chr3	164908188	164916329
m1	chr3	172426471	172429567
m1	chr3	182832026	182834595
m1	chr3	185117679	185118060
m1	chr3	185660637	185661796
m1	chr3	185813301	185817590
m1	chr3	185956701	185957536
m1	chr3	197192115	197195542
m1	chr4	4397750	4398629
m1	chr4	6943476	6946758
m1	chr4	11422484	11432213
m1	chr4	15479312	15482573
m1	chr4	16673304	16676084
m1	chr4	21947813	21951385
m1	chr4	46991063	46997625
m1	chr4	54419432	54425250
m1	chr4	55083705	55084689
m1	chr4	57299766	57304338
m1	chr4	73946176	73946492
m1	chr4	89673659	89682210
m1	chr4	119809314	119812959
m1	chr4	152693210	152693604
m1	chr4	152930292	152931897
m1	chr4	153022143	153025535
m1	chr4	160321497	160323303
m1	chr4	163083624	163086375
m1	chr4	166266782	166267300
m1	chr4	175749361	175751121
m1	chr4	176726843	176736166
m1	chr4	184761729	184761903
m1	chr4	185186692	185189862
m1	chr4	186729730	186733939
m1	chr4	186876447	186878092
m1	chr4	186942089	186943495
m1	chr5	7392256	7401308
m1	chr5	7540697	7541172
m1	chr5	7662387	7662784
m1	chr5	14248759	14253032
m1	chr5	14356961	14360653
m1	chr5	14439893	14446869
m1	chr5	17211910	17222655
m1	chr5	17404099	17407049
m1	chr5	19986105	19989205
m1	chr5	22850997	22853850
m1	chr5	32531692	32532601
m1	chr5	57877546	57880408
m1	chr5	63801151	63805513
m1	chr5	63870525	63872151
m1	chr5	67829239	67830851
m1	chr5	68113434	68115202
m1	chr5	68302710	68303622
m1	chr5	73926584	73939188
m1	chr5	73967882	73969665
m1	chr5	88056424	88057774
m1	chr5	92905898	92931805
m1	chr5	113784180	113786352
m1	chr5	140380777	140384348
m1	chr5	140862748	140876215
m1	chr5	140900894	140905800
m1	chr5	142246288	142246764
m1	chr5	143583732	143592214
m1	chr5	143977808	143978818
m1	chr5	145315970	145317144
m1	chr5	146254205	146259591
m1	chr5	146762337	146763012
m1	chr5	152869009	152875932
m1	chr5	156771210	156773099
m1	chr5	161273792	161285794
m1	chr5	161493742	161497801
m1	chr5	162991058	162994701
m1	chr5	166404689	166410852
m1	chr5	166999800	167004927
m1	chr5	172305970	172306335
m1	chr5	173471652	173475620
m1	chr5	174867147	174872692
m1	chr5	179750267	179752466
m1	chr6	5143543	5144539
m1	chr6	5151728	5152929
m1	chr6	6621895	6623241
m1	chr6	12716686	12722873
m1	chr6	12893833	12894188
m1	chr6	13026353	13026889
m1	chr6	13410337	13415580
m1	chr6	13445259	13448564
m1	chr6	13483474	13489086
m1	chr6	13767443	13768147
m1	chr6	16964461	16965593
m1	chr6	19691666	19692502
m1	chr6	24126382	24127905
m1	chr6	24644133	24648027
m1	chr6	27774603	27776531
m1	chr6	27791455	27793261
m1	chr6	28553308	28557795
m1	chr6	28565440	28565981
m1	chr6	28602229	28604185
m1	chr6	28624807	28627403
m1	chr6	30324435	30326533
m1	chr6	31333432	31335866
m1	chr6	36252759	36253681
m1	chr6	42411430	42412387
m1	chr6	42738485	42740368
m1	chr6	53975796	53977289
m1	chr6	55442328	55444517
m1	chr6	69942272	69945033
m1	chr6	75794496	75795633
m1	chr6	87646282	87649213
m1	chr6	88677803	88678908
m1	chr6	89294430	89295162
m1	chr6	110617405	110619263
m1	chr6	110676548	110681112
m1	chr6	143019302	143019635
m1	chr6	143928895	143930709
m1	chr6	146348405	146351790
m1	chr6	147234865	147236067
m1	chr6	154565231	154569149
m1	chr6	155537581	155542761
m1	chr6	157638623	157640325
m1	chr6	166263570	166264050
m1	chr6	167657461	167657889
m1	chr7	5305265	5305641
m1	chr7	6435496	6436302
m1	chr7	6437851	6439657
m1	chr7	6472554	6477173
m1	chr7	14940053	14943778
m1	chr7	19811336	19813618
m1	chr7	22091639	22092198
m1	chr7	22394812	22397469
m1	chr7	24610816	24616754
m1	chr7	26330998	26334753
m1	chr7	31379873	31380688
m1	chr7	37022159	37027216
m1	chr7	37232816	37234286
m1	chr7	38667971	38671533
m1	chr7	39015316	39018549
m1	chr7	39123603	39127434
m1	chr7	43287830	43290708
m1	chr7	45958440	45962979
m1	chr7	54608269	54614938
m1	chr7	66949481	66949907
m1	chr7	97735195	97741616
m1	chr7	106684230	106688662
m1	chr7	106705886	106706394
m1	chr7	108233420	108233693
m1	chr7	127176660	127177430
m1	chr7	127479042	127479538
m1	chr7	127540358	127542434
m1	chr7	127544556	127544955
m1	chr7	127582651	127584803
m1	chr7	127656777	127677877
m1	chr7	137453142	137453643
m1	chr7	145811967	145816573
m1	chr7	147973487	147974359
m1	chr7	154001350	154006032
m1	chr8	622218	623986
m1	chr8	2675988	2676438
m1	chr8	3140563	3142239
m1	chr8	9753836	9778113
m1	chr8	9790914	9791637
m1	chr8	9820029	9822569
m1	chr8	9991698	9992529
m1	chr8	9995487	10005797
m1	chr8	10007464	10010579
m1	chr8	10158306	10160061
m1	chr8	15397263	15398802
m1	chr8	27460015	27475302
m1	chr8	29970324	29971633
m1	chr8	35092430	35098744
m1	chr8	38642219	38650888
m1	chr8	40750093	40756177
m1	chr8	48102679	48104101
m1	chr8	50821464	50828654
m1	chr8	58982147	58984575
m1	chr8	62199849	62203603
m1	chr8	64558150	64560550
m1	chr8	64615221	64617737
m1	chr8	65277133	65295271
m1	chr8	70853852	70855611
m1	chr8	89334448	89341514
m1	chr8	99376891	99377603
m1	chr8	102166698	102169029
m1	chr8	104137097	104137938
m1	chr8	110654794	110661304
m1	chr8	133204082	133206174
m1	chr8	133684919	133689496
m1	chr8	136225189	136226013
m1	chr8	136467022	136480273
m1	chr8	139758032	139758284
m1	chr9	7401708	7402043
m1	chr9	14992658	14994602
m1	chr9	15135015	15135828
m1	chr9	17810691	17811164
m1	chr9	35341303	35343570
m1	chr9	71198980	71199504
m1	chr9	73215005	73219607
m1	chr9	73734452	73737164
m1	chr9	80045340	80049402
m1	chr9	87446480	87447837
m1	chr9	87560959	87563473
m1	chr9	88043519	88046777
m1	chr9	88058224	88058899
m1	chr9	88731219	88731897
m1	chr9	90112040	90115965
m1	chr9	91786378	91796201
m1	chr9	91849213	91850147
m1	chr9	114720328	114720873
m1	chr9	122098888	122099750
m1	chr9	122125294	122133421
m1	chr9	124370145	124370558
m1	chr9	125794014	125800162
m1	chr9	131311148	131322151
m1	chrX	9879400	9882900
m1	chrX	12155306	12159642
m1	chrX	21391219	21395841
m1	chrX	38419985	38423185
m1	chrX	48690625	48694771
m1	chrX	56257882	56260823
m1	chrX	75001268	75002569
m1	chrX	100333436	100336870
m1	chrX	100474272	100477050
m1	chrX	102530018	102532804
m1	chrX	109680313	109683937
m1	chrX	110338654	110343095
m1	chrX	110653125	110655452
m1	chrX	154996386	154998450
m11	chr1	1891068	1892790
m11	chr1	1950176	1957728
m11	chr1	2004232	2007756
m11	chr1	4773351	4773463
m11	chr1	6048232	6063277
m11	chr1	6067018	6068416
m11	chr1	6140128	6140559
m11	chr1	6141931	6147569
m11	chr1	6220716	6232948
m11	chr1	6236605	6239557
m11	chr1	9255631	9263111
m11	chr1	15909886	15911854
m11	chr1	18433261	18439903
m11	chr1	19990923	19992013
m11	chr1	21989283	21999348
m11	chr1	25941064	25950557
m11	chr1	27429471	27429570
m11	chr1	29709713	29710209
m11	chr1	33334708	33338992
m11	chr1	33351569	33353241
m11	chr1	35388344	35396582
m11	chr1	38229404	38232278
m11	chr1	40135109	40139015
m11	chr1	41388363	41389553
m11	chr1	51795194	51797486
m11	chr1	111024718	111027419
m11	chr1	112271858	112284084
m11	chr1	112528352	112536391
m11	chr1	148927822	148930498
m11	chr1	151678589	151691409
m11	chr1	156624857	156641483
m11	chr1	159140686	159145643
m11	chr1	160046908	160077527
m11	chr1	162851342	162852032
m11	chr1	175853458	175857679
m11	chr1	204326077	204334530
m11	chr1	204650803	204655402
m11	chr1	204795976	204803639
m11	chr1	204971750	204973862
m11	chr1	205536669	205541208
m11	chr1	228601766	228605100
m11	chr1	229542619	229548113
m11	chr1	229570380	229570990
m11	chr1	234348774	234354280
m11	chr1	243653917	243654477
m11	chr1	247511083	247511770
m11	chr10	25990489	25990821
m11	chr10	43361779	43362600
m11	chr10	43756968	43762817
m11	chr10	76859626	76860936
m11	chr10	79807253	79808146
m11	chr10	98939262	98946292
m11	chr10	99608836	99613178
m11	chr10	105217127	105217591
m11	chr10	105218875	105219738
m11	chr10	105311665	105318656
m11	chr10	129815691	129817613
m11	chr10	134895906	134905771
m11	chr10	135148154	135150994
m11	chr10	135341128	135343411
m11	chr11	858616	860598
m11	chr11	3056714	3059705
m11	chr11	12131090	12136848
m11	chr11	17755475	17762133
m11	chr11	19137961	19140706
m11	chr11	44957747	44958937
m11	chr11	45305678	45308617
m11	chr11	45906792	45909406
m11	chr11	46409841	46414767
m11	chr11	56947376	56949392
m11	chr11	57224598	57232930
m11	chr11	57235269	57235679
m11	chr11	57411214	57418125
m11	chr11	61244858	61245753
m11	chr11	61339126	61349831
m11	chr11	62683642	62691776
m11	chr11	66492183	66498032
m11	chr11	66789852	66792994
m11	chr11	70349751	70350134
m11	chr11	70470261	70475887
m11	chr11	70477202	70478626
m11	chr11	117296356	117298930
m11	chr11	118012830	118017358
m11	chr11	119287372	119295953
m11	chr11	124284373	124284912
m11	chr11	124587513	124589821
m11	chr11	124606885	124617334
m11	chr11	133812817	133828162
m11	chr11	133901290	133913416
m11	chr12	248125	249142
m11	chr12	1928480	1937049
m11	chr12	2692348	2692902
m11	chr12	3474015	3475929
m11	chr12	4526921	4527126
m11	chr12	4966564	4970203
m11	chr12	49363028	49365820
m11	chr12	49388241	49395478
m11	chr12	49930841	49936085
m11	chr12	51983639	51988277
m11	chr12	52210654	52216102
m11	chr12	53183737	53184286
m11	chr12	58023400	58027611
m11	chr12	124932817	124943328
m11	chr12	125667451	125675124
m11	chr12	129453249	129455602
m11	chr12	130526449	130527349
m11	chr12	131197693	131202073
m11	chr12	131302846	131304684
m11	chr12	132899138	132907463
m11	chr13	21295718	21296445
m11	chr13	26042344	26043729
m11	chr13	31617033	31621725
m11	chr13	110521707	110522829
m11	chr14	23351449	23353417
m11	chr14	65432296	65440062
m11	chr14	70040168	70042276
m11	chr14	77602100	77612934
m11	chr14	77647545	77651111
m11	chr14	93388706	93395585
m11	chr14	96504546	96509585
m11	chr14	101291233	101295490
m11	chr14	101543216	101544586
m11	chr14	104928085	104928710
m11	chr14	105064485	105071960
m11	chr14	105309456	105312366
m11	chr15	27111728	27113865
m11	chr15	29139585	29141143
m11	chr15	40530609	40534698
m11	chr15	72517947	72525324
m11	chr15	73610801	73611719
m11	chr15	73974322	73981366
m11	chr15	74420418	74421946
m11	chr15	77954825	77957781
m11	chr15	77958997	77959806
m11	chr15	77985790	77990722
m11	chr15	78108426	78116331
m11	chr15	83376861	83379518
m11	chr15	84748167	84749700
m11	chr15	89147026	89150661
m11	chr15	90033194	90034615
m11	chr15	91360819	91362270
m11	chr15	101513327	101514236
m11	chr16	329122	333647
m11	chr16	356448	358259
m11	chr16	387430	388517
m11	chr16	749329	763030
m11	chr16	9248321	9248884
m11	chr16	10131875	10135160
m11	chr16	10172385	10172683
m11	chr16	23846299	23852046
m11	chr16	28269623	28273228
m11	chr16	30020560	30023701
m11	chr16	31017520	31022957
m11	chr16	58496637	58500407
m11	chr16	66877862	66881521
m11	chr16	67686304	67689089
m11	chr16	68480404	68483556
m11	chr16	81572719	81573306
m11	chr16	85059530	85064043
m11	chr16	85495080	85497640
m11	chr16	87518218	87527709
m11	chr16	87634854	87642169
m11	chr16	87839564	87841191
m11	chr16	88120399	88125569
m11	chr16	89116430	89119986
m11	chr17	179992	184746
m11	chr17	1664976	1667853
m11	chr17	1898889	1903753
m11	chr17	1918984	1929782
m11	chr17	2651389	2654195
m11	chr17	2679277	2682327
m11	chr17	2702592	2703538
m11	chr17	3597639	3600948
m11	chr17	6456457	6460756
m11	chr17	7606087	7610625
m11	chr17	8013133	8014001
m11	chr17	10521592	10522041
m11	chr17	17623755	17638139
m11	chr17	21278754	21281679
m11	chr17	27331072	27333704
m11	chr17	35060225	35060929
m11	chr17	37304274	37311322
m11	chr17	37363089	37367235
m11	chr17	37757902	37764730
m11	chr17	38276213	38282797
m11	chr17	38332380	38338031
m11	chr17	39803811	39805458
m11	chr17	42835276	42840149
m11	chr17	43315737	43322242
m11	chr17	43860666	43864891
m11	chr17	43970869	43978281
m11	chr17	48609760	48612841
m11	chr17	61514322	61515655
m11	chr17	72888621	72890230
m11	chr17	74835756	74837061
m11	chr17	74863032	74869567
m11	chr17	75566926	75569193
m11	chr17	75692052	75693401
m11	chr17	75798214	75799709
m11	chr17	77180173	77180481
m11	chr17	77460924	77462318
m11	chr17	78441866	78452533
m11	chr17	79022519	79024178
m11	chr17	79025679	79028166
m11	chr17	79404692	79406222
m11	chr18	10726172	10727323
m11	chr18	34969611	34975964
m11	chr18	35023372	35026124
m11	chr18	35062701	35067299
m11	chr18	35082386	35082887
m11	chr19	3224345	3229879
m11	chr19	3271652	3271769
m11	chr19	3785271	3786342
m11	chr19	3800936	3802223
m11	chr19	3866823	3869013
m11	chr19	3880092	3883716
m11	chr19	4197979	4199947
m11	chr19	4606999	4607484
m11	chr19	4769042	4770967
m11	chr19	5239772	5240377
m11	chr19	5436384	5437403
m11	chr19	7660144	7663083
m11	chr19	7852846	7854329
m11	chr19	10022423	10025877
m11	chr19	10400150	10402908
m11	chr19	17535349	17536287
m11	chr19	17789634	17792086
m11	chr19	17796516	17799860
m11	chr19	18343936	18344307
m11	chr19	31172881	31179220
m11	chr19	31828929	31843735
m11	chr19	39217751	39218907
m11	chr19	40722404	40724757
m11	chr19	40870968	40875509
m11	chr19	42494120	42504240
m11	chr19	42677884	42683756
m11	chr19	42854109	42858649
m11	chr19	44278133	44279175
m11	chr19	44301613	44303417
m11	chr19	47031841	47034139
m11	chr19	47103250	47116018
m11	chr19	47971466	47977027
m11	chr19	49199147	49200313
m11	chr19	49436289	49438218
m11	chr19	49699571	49700510
m11	chr19	50817567	50819576
m11	chr19	51196704	51200351
m11	chr19	51814480	51816633
m11	chr19	54460974	54468699
m11	chr19	55727941	55728927
m11	chr19	57154065	57155931
m11	chr2	2511027	2512010
m11	chr2	2527599	2528068
m11	chr2	2841426	2842406
m11	chr2	10971319	10978306
m11	chr2	11269751	11275018
m11	chr2	26914731	26916984
m11	chr2	27340803	27342214
m11	chr2	27482953	27488313
m11	chr2	47793266	47799307
m11	chr2	62020555	62021010
m11	chr2	73150665	73151661
m11	chr2	73492153	73497127
m11	chr2	73509709	73512746
m11	chr2	97577002	97580583
m11	chr2	106013597	106015944
m11	chr2	131483924	131486801
m11	chr2	131720322	131725142
m11	chr2	131789965	131800353
m11	chr2	149478018	149478568
m11	chr2	167350511	167351195
m11	chr2	219819305	219829363
m11	chr2	220172086	220174562
m11	chr2	220305738	220314464
m11	chr2	220491425	220495354
m11	chr2	240248476	240253550
m11	chr2	240677874	240679292
m11	chr20	654197	657447
m11	chr20	1164206	1166904
m11	chr20	25128939	25129891
m11	chr20	25251772	25257097
m11	chr20	30554764	30558879
m11	chr20	33541961	33545751
m11	chr20	34471842	34472354
m11	chr20	34892771	34896876
m11	chr20	36050195	36051647
m11	chr20	36530871	36535179
m11	chr20	37274186	37275586
m11	chr20	37301360	37303692
m11	chr20	37676351	37679818
m11	chr20	41815130	41820718
m11	chr20	42875038	42878424
m11	chr20	43434189	43439983
m11	chr20	44657145	44664038
m11	chr20	44969843	44972262
m11	chr20	62091147	62104644
m11	chr20	62132993	62134595
m11	chr20	62719761	62724744
m11	chr22	18592633	18597216
m11	chr22	18956830	18962469
m11	chr22	21056063	21056395
m11	chr22	21386005	21387381
m11	chr22	25506222	25511678
m11	chr22	26563709	26571141
m11	chr22	27418972	27419256
m11	chr22	28414793	28417807
m11	chr22	29870879	29878572
m11	chr22	31216707	31222317
m11	chr22	32598060	32603018
m11	chr22	35935337	35941927
m11	chr22	37604724	37609022
m11	chr22	37730484	37731448
m11	chr22	37820339	37824855
m11	chr22	38845032	38854149
m11	chr22	39235436	39241521
m11	chr22	39257536	39270235
m11	chr22	39755834	39761822
m11	chr22	39953141	39957507
m11	chr22	41074619	41079425
m11	chr22	42713334	42716457
m11	chr22	43926200	43926811
m11	chr22	43957396	43957894
m11	chr22	44287076	44287976
m11	chr22	44387773	44392284
m11	chr22	44725704	44728193
m11	chr3	9593843	9596398
m11	chr3	9745287	9746785
m11	chr3	10539619	10549748
m11	chr3	13691815	13693523
m11	chr3	14596548	14597936
m11	chr3	42541166	42547855
m11	chr3	49901658	49908619
m11	chr3	51739999	51742965
m11	chr3	52525087	52525278
m11	chr3	53526946	53533577
m11	chr3	122710699	122712923
m11	chr3	126709455	126711437
m11	chr3	127501259	127501450
m11	chr3	133131117	133133194
m11	chr3	133610094	133617028
m11	chr3	184261433	184262255
m11	chr3	184277205	184288508
m11	chr3	197324363	197328032
m11	chr4	566742	573949
m11	chr4	787427	789610
m11	chr4	817093	819871
m11	chr4	1993662	1994742
m11	chr4	2362405	2369663
m11	chr4	5886904	5895355
m11	chr4	6199371	6203106
m11	chr4	6383849	6385899
m11	chr4	6467586	6475796
m11	chr4	6560784	6566578
m11	chr4	8072498	8075078
m11	chr4	53727014	53732204
m11	chr5	1641417	1645692
m11	chr5	10537691	10538013
m11	chr5	21459601	21459992
m11	chr5	132944615	132948760
m11	chr5	137773053	137777516
m11	chr5	139134495	139136954
m11	chr5	141079577	141083833
m11	chr5	141150303	141154554
m11	chr5	141200887	141207796
m11	chr5	141244383	141265386
m11	chr5	148735924	148740374
m11	chr5	149569187	149571884
m11	chr5	149820770	149822438
m11	chr5	150001381	150009231
m11	chr5	150521058	150521303
m11	chr5	157169165	157174106
m11	chr5	175156124	175156961
m11	chr5	175257603	175258012
m11	chr5	175298047	175303563
m11	chr5	176035400	176037544
m11	chr5	176052956	176059918
m11	chr5	176087460	176088337
m11	chr5	176236193	176245393
m11	chr5	176498672	176499328
m11	chr5	177548155	177550601
m11	chr5	179740752	179741933
m11	chr5	180100686	180101124
m11	chr6	12749176	12750846
m11	chr6	27598658	27599192
m11	chr6	29520943	29521521
m11	chr6	31743235	31745561
m11	chr6	33560678	33561475
m11	chr6	34111034	34113762
m11	chr6	34432897	34437744
m11	chr6	34479206	34486242
m11	chr6	36097640	36101864
m11	chr6	36802422	36809254
m11	chr6	44236026	44242487
m11	chr7	749981	752895
m11	chr7	1002967	1006090
m11	chr7	3339787	3342823
m11	chr7	42980754	42981446
m11	chr7	44303120	44309767
m11	chr7	44315044	44318677
m11	chr7	44360350	44366735
m11	chr7	45613333	45619417
m11	chr7	45927636	45928583
m11	chr7	73037129	73038947
m11	chr7	75831181	75834331
m11	chr7	75834742	75836592
m11	chr7	100252671	100254926
m11	chr7	105278837	105280632
m11	chr7	127752265	127753326
m11	chr7	131629889	131630959
m11	chr7	142551343	142566576
m11	chr7	151509817	151514567
m11	chr7	154861626	154864291
m11	chr7	158280884	158281434
m11	chr7	158286854	158288957
m11	chr7	158378537	158381289
m11	chr8	10280341	10286778
m11	chr8	21880881	21884346
m11	chr8	21909229	21927839
m11	chr8	22081282	22091907
m11	chr8	22648576	22648853
m11	chr8	24799178	24800143
m11	chr8	38408500	38412535
m11	chr8	41503103	41504962
m11	chr8	140642697	140643807
m11	chr8	143261318	143265720
m11	chr8	143463608	143464441
m11	chr8	143497373	143498770
m11	chr8	143586634	143597444
m11	chr8	143762478	143763963
m11	chr8	143865999	143866985
m11	chr8	144239539	144242609
m11	chr8	145287891	145288647
m11	chr8	145558208	145562824
m11	chr9	34700899	34702911
m11	chr9	124459545	124466757
m11	chr9	124885425	124890484
m11	chr9	130513429	130518696
m11	chr9	131999329	131999992
m11	chr9	132140013	132141661
m11	chr9	132155626	132157436
m11	chr9	132337611	132339067
m11	chr9	132943310	132951497
m11	chr9	132974051	132975328
m11	chr9	134131024	134134131
m11	chr9	136468504	136476716
m11	chr9	137992561	138003333
m11	chr9	138584912	138585762
m11	chr9	138593199	138597035
m11	chr9	138604409	138610763
m11	chr9	138627065	138630685
m11	chr9	140032176	140038591
m11	chr9	140772656	140778743
m11	chr9	140794093	140795064
m11	chrX	19390469	19391754
m11	chrX	53344596	53351412
m11	chrX	54833711	54837844
m11	chrX	69663821	69668047
m11	chrX	71288602	71289902
m11	chrX	111324619	111326715
m11	chrX	153147998	153152132
m111	chr1	16170163	16178829
m111	chr1	33424842	33431064
m111	chr1	35651710	35659581
m111	chr1	52605152	52611350
m111	chr1	53016306	53020900
m111	chr1	55675041	55683971
m111	chr1	59280401	59283216
m111	chr1	64057903	64060293
m111	chr1	65527725	65536303
m111	chr1	67516662	67520697
m111	chr1	90094751	90102782
m111	chr1	93643080	93647130
m111	chr1	94308811	94314982
m111	chr1	94372488	94375870
m111	chr1	95581068	95586278
m111	chr1	99125729	99130095
m111	chr1	121137556	121139228
m111	chr1	148176104	148176790
m111	chr1	149764140	149765407
m111	chr1	161718321	161721899
m111	chr1	162530110	162532508
m111	chr1	165795742	165799036
m111	chr1	167188207	167194112
m111	chr1	179196572	179200245
m111	chr1	180468934	180472952
m111	chr1	185013681	185017141
m111	chr1	205178122	205181965
m111	chr1	232761717	232767159
m111	chr1	236686206	236689546
m111	chr1	244010497	244015293
m111	chr1	244624026	244625547
m111	chr1	245080426	245083069
m111	chr10	177309	183970
m111	chr10	11651459	11654699
m111	chr10	13340998	13344964
m111	chr10	23383449	23386866
m111	chr10	23726504	23732542
m111	chr10	29010288	29011837
m111	chr10	32215106	32220179
m111	chr10	32632695	32639586
m111	chr10	33268996	33271151
m111	chr10	35413993	35420090
m111	chr10	60094206	60096633
m111	chr10	62537648	62538931
m111	chr10	62700063	62705270
m111	chr10	65223899	65227931
m111	chr10	69643319	69646460
m111	chr10	70163453	70167883
m111	chr10	74450667	74455179
m111	chr10	74853183	74858077
m111	chr10	81585817	81587125
m111	chr10	88157788	88163012
m111	chr10	89101807	89102970
m111	chr10	90341831	90343733
m111	chr10	93646762	93648038
m111	chr10	93667064	93670052
m111	chr10	94049711	94052948
m111	chr10	94330145	94335527
m111	chr10	94607303	94610146
m111	chr10	98590090	98596435
m111	chr10	112326466	112331284
m111	chr10	116580774	116585484
m111	chr10	120965451	120971470
m111	chr11	10313478	10317350
m111	chr11	14912372	14914414
m111	chr11	32912861	32917478
m111	chr11	33060284	33063806
m111	chr11	33277224	33282419
m111	chr11	36529803	36532889
m111	chr11	59521025	59525124
m111	chr11	61879524	61880471
m111	chr11	66883502	66890731
m111	chr11	77299595	77303186
m111	chr11	118659426	118664395
m111	chr11	129870778	129874630
m111	chr11	129937942	129942284
m111	chr12	858043	866421
m111	chr12	12417269	12421160
m111	chr12	19281701	19285793
m111	chr12	19591777	19595222
m111	chr12	27929854	27935725
m111	chr12	30905701	30909202
m111	chr12	31740957	31744987
m111	chr12	42324438	42327439
m111	chr12	42536962	42540172
m111	chr12	44228564	44231757
m111	chr12	49624246	49630612
m111	chr12	51156375	51160662
m111	chr12	62994771	62999585
m111	chr12	63024412	63026884
m111	chr12	63322987	63330251
m111	chr12	64236894	64240867
m111	chr12	65562606	65567333
m111	chr12	98906999	98911539
m111	chr12	116711608	116716456
m111	chr12	123942499	123944833
m111	chr13	20531448	20537614
m111	chr13	25591806	25593224
m111	chr13	26827471	26831561
m111	chr13	27130942	27133611
m111	chr13	27742306	27747518
m111	chr13	30686243	30690857
m111	chr13	31772965	31776775
m111	chr13	42532799	42536402
m111	chr13	45883370	45886365
m111	chr13	49548801	49552894
m111	chr13	50363651	50367981
m111	chr13	50695907	50702050
m111	chr13	95253144	95255850
m111	chr13	102066901	102070508
m111	chr13	111564510	111569367
m111	chr14	24420818	24424489
m111	chr14	30393735	30397809
m111	chr14	31674295	31678646
m111	chr14	37640903	37642879
m111	chr14	39734208	39739029
m111	chr14	50158323	50161825
m111	chr14	50696056	50700075
m111	chr14	51132728	51137622
m111	chr14	53158521	53163378
m111	chr14	53616352	53620694
m111	chr14	56045078	56049928
m111	chr14	60331980	60339545
m111	chr14	64966532	64975349
m111	chr14	71371807	71377830
m111	chr14	89256631	89260887
m111	chr14	100701130	100709347
m111	chr15	23207279	23208998
m111	chr15	28982496	28983487
m111	chr15	40210784	40214401
m111	chr15	51199173	51202526
m111	chr15	69105301	69115556
m111	chr15	75868667	75872549
m111	chr15	80694313	80700882
m111	chr15	83873491	83877823
m111	chr15	93256978	93258881
m111	chr16	22448015	22448909
m111	chr16	46862248	46866222
m111	chr16	48416581	48421085
m111	chr16	53163264	53167079
m111	chr16	75032043	75036721
m111	chr17	16116190	16121542
m111	chr17	19409623	19412334
m111	chr17	19768472	19772068
m111	chr17	19911499	19915582
m111	chr17	20942727	20947932
m111	chr17	21414096	21417437
m111	chr17	28926434	28929402
m111	chr17	30333565	30336778
m111	chr17	43660220	43663976
m111	chr17	54909589	54916202
m111	chr18	11907145	11910834
m111	chr18	13824009	13824542
m111	chr18	15197219	15198829
m111	chr18	19177943	19181649
m111	chr18	21718315	21719815
m111	chr18	22928536	22933437
m111	chr18	33159739	33163683
m111	chr18	59248757	59249823
m111	chr18	59991991	59993869
m111	chr18	60188165	60195209
m111	chr18	74532785	74537219
m111	chr19	23868502	23870974
m111	chr19	34744596	34747274
m111	chr2	9982881	9985505
m111	chr2	24147350	24152120
m111	chr2	24161763	24165279
m111	chr2	24581179	24584122
m111	chr2	24712279	24717171
m111	chr2	36578908	36587885
m111	chr2	37382269	37386147
m111	chr2	38601602	38606234
m111	chr2	38825386	38832983
m111	chr2	42793699	42797538
m111	chr2	43036103	43038985
m111	chr2	45876457	45881717
m111	chr2	55508634	55511063
m111	chr2	61292042	61294480
m111	chr2	64244586	64247660
m111	chr2	65662218	65665495
m111	chr2	67623991	67625499
m111	chr2	70137720	70145963
m111	chr2	85107260	85109776
m111	chr2	85195628	85200846
m111	chr2	97778158	97779821
m111	chr2	98609455	98613175
m111	chr2	106807597	106812034
m111	chr2	113032241	113035452
m111	chr2	120769617	120772371
m111	chr2	136498754	136502075
m111	chr2	154727427	154731057
m111	chr2	157291336	157295029
m111	chr2	158728719	158734680
m111	chr2	160567371	160571408
m111	chr2	164204153	164205651
m111	chr2	165693175	165700295
m111	chr2	172014351	172018560
m111	chr2	173419487	173423346
m111	chr2	180127229	180131023
m111	chr2	191397110	191400932
m111	chr2	191744181	191749570
m111	chr2	197788690	197793151
m111	chr2	201169865	201174547
m111	chr2	208393366	208396984
m111	chr2	208487463	208492543
m111	chr2	208575330	208578660
m111	chr2	223724498	223730233
m111	chr2	232161568	232161843
m111	chr2	233470240	233471425
m111	chr2	240318822	240324421
m111	chr20	2503763	2506635
m111	chr20	5509504	5510851
m111	chr20	16552778	16556863
m111	chr20	24448665	24454476
m111	chr20	25369828	25372309
m111	chr20	33100528	33106128
m111	chr20	49545001	49550150
m111	chr20	50806557	50810590
m111	chr21	38737227	38743604
m111	chr21	40683360	40687119
m111	chr22	17651676	17653917
m111	chr3	4508157	4509515
m111	chr3	14480346	14481786
m111	chr3	23243025	23248837
m111	chr3	31572504	31577943
m111	chr3	41239742	41246261
m111	chr3	47200743	47208332
m111	chr3	57260696	57264467
m111	chr3	71624866	71636314
m111	chr3	98450055	98455069
m111	chr3	98618404	98622089
m111	chr3	107146121	107151934
m111	chr3	115502684	115504677
m111	chr3	118957534	118960755
m111	chr3	120065409	120070359
m111	chr3	128397971	128400973
m111	chr3	138326709	138329696
m111	chr3	138552114	138554963
m111	chr3	141204490	141208458
m111	chr3	141593771	141598100
m111	chr3	142442489	142445127
m111	chr3	150477571	150483049
m111	chr3	155522386	155524635
m111	chr3	169487121	169487951
m111	chr3	170073017	170077339
m111	chr3	173112307	173122580
m111	chr3	178978435	178979802
m111	chr3	179038978	179043116
m111	chr3	179369176	179373040
m111	chr3	186489764	186491232
m111	chr4	15001960	15020265
m111	chr4	26320549	26326943
m111	chr4	39976862	39980703
m111	chr4	44447503	44452143
m111	chr4	53523702	53527235
m111	chr4	71569233	71573192
m111	chr4	85884779	85893119
m111	chr4	88139675	88142568
m111	chr4	88927736	88934061
m111	chr4	89299425	89300770
m111	chr4	89511757	89515368
m111	chr4	99179710	99184852
m111	chr4	103420196	103427576
m111	chr4	108850926	108854880
m111	chr4	111113795	111120695
m111	chr4	119754081	119758302
m111	chr4	125630455	125635252
m111	chr4	128702323	128706354
m111	chr4	128981338	128984210
m111	chr4	129730162	129734445
m111	chr4	139935197	139938042
m111	chr4	140472047	140481939
m111	chr4	140654557	140657849
m111	chr4	149360366	149369177
m111	chr4	164414301	164417303
m111	chr4	166127335	166132241
m111	chr4	174088844	174093506
m111	chr4	184328224	184329443
m111	chr4	184423571	184428785
m111	chr4	186390984	186393613
m111	chr5	14868806	14873287
m111	chr5	32172231	32175539
m111	chr5	32441766	32445957
m111	chr5	32585117	32589505
m111	chr5	39422371	39427637
m111	chr5	41924456	41926390
m111	chr5	56109496	56115504
m111	chr5	56468025	56476110
m111	chr5	59994859	59997199
m111	chr5	60624565	60631961
m111	chr5	72249828	72254456
m111	chr5	73980592	73983344
m111	chr5	74158375	74163204
m111	chr5	77654360	77658459
m111	chr5	78277417	78282859
m111	chr5	81042758	81048871
m111	chr5	83674244	83683572
m111	chr5	96267589	96274501
m111	chr5	107714290	107719342
m111	chr5	126111455	126116536
m111	chr5	126564520	126565925
m111	chr5	127414297	127423186
m111	chr5	128795049	128798075
m111	chr5	130498626	130501990
m111	chr5	131744307	131748821
m111	chr5	134239358	134242754
m111	chr5	137688178	137692065
m111	chr5	138628763	138634119
m111	chr5	139415318	139423983
m111	chr5	176431244	176434477
m111	chr6	2968730	2974142
m111	chr6	13572661	13576363
m111	chr6	16756695	16765459
m111	chr6	17599694	17603871
m111	chr6	45386909	45393493
m111	chr6	46456841	46461390
m111	chr6	56817661	56822147
m111	chr6	56910923	56911789
m111	chr6	57035765	57039005
m111	chr6	57085871	57088158
m111	chr6	64344518	64348941
m111	chr6	74361735	74365347
m111	chr6	76457767	76462528
m111	chr6	86301208	86305371
m111	chr6	90059748	90064050
m111	chr6	91003122	91008463
m111	chr6	107434701	107438304
m111	chr6	108580487	108583492
m111	chr6	124122707	124130358
m111	chr6	125281753	125287250
m111	chr6	125620655	125623826
m111	chr6	130338995	130343552
m111	chr6	137142761	137144688
m111	chr6	139453553	139459348
m111	chr6	143259808	143269810
m111	chr6	144536208	144540961
m111	chr6	146054894	146058650
m111	chr6	148880068	148882006
m111	chr6	150181676	150187267
m111	chr6	155052832	155056478
m111	chr6	157094581	157105670
m111	chr6	157742739	157746571
m111	chr6	157799364	157805706
m111	chr6	158177403	158178366
m111	chr6	158243001	158246763
m111	chr6	160389025	160391903
m111	chr6	161411775	161414590
m111	chr7	29723712	29725986
m111	chr7	30322811	30327737
m111	chr7	32980744	32983386
m111	chr7	38350126	38351473
m111	chr7	39987580	39995245
m111	chr7	56101316	56102370
m111	chr7	65669282	65673286
m111	chr7	69061310	69066660
m111	chr7	74069659	74077389
m111	chr7	77043523	77047168
m111	chr7	79079944	79086620
m111	chr7	86846159	86850844
m111	chr7	92074613	92080125
m111	chr7	92218049	92221150
m111	chr7	94138309	94143737
m111	chr7	94535743	94540067
m111	chr7	105027337	105030243
m111	chr7	105749200	105753727
m111	chr7	106299179	106302265
m111	chr7	116501744	116504874
m111	chr7	117506334	117514702
m111	chr7	129249492	129253653
m111	chr7	138144246	138147015
m111	chr7	139874356	139878159
m111	chr7	140175776	140179891
m111	chr7	148394070	148400346
m111	chr7	148786965	148789189
m111	chr7	153748958	153749260
m111	chr8	12609280	12616672
m111	chr8	16857802	16860272
m111	chr8	17011759	17017558
m111	chr8	17432890	17435879
m111	chr8	22297298	22302787
m111	chr8	29950823	29954789
m111	chr8	33328425	33331310
m111	chr8	38087351	38091705
m111	chr8	38623547	38629676
m111	chr8	42748467	42755514
m111	chr8	42994213	42998459
m111	chr8	57121811	57125744
m111	chr8	70906693	70907308
m111	chr8	71311469	71317465
m111	chr8	81783942	81787394
m111	chr8	90913790	90917461
m111	chr8	91011424	91015717
m111	chr8	98655252	98660924
m111	chr8	98787248	98790404
m111	chr8	101958618	101966818
m111	chr8	103874121	103878346
m111	chr8	125380997	125386025
m111	chr8	131057829	131058737
m111	chr8	135723306	135726571
m111	chr8	142009008	142013291
m111	chr9	4739175	4743708
m111	chr9	4982814	4990202
m111	chr9	13277837	13281173
m111	chr9	19229377	19233723
m111	chr9	25676981	25679294
m111	chr9	35488318	35492422
m111	chr9	77564995	77568734
m111	chr9	77639911	77644022
m111	chr9	79008318	79011017
m111	chr9	79791521	79794904
m111	chr9	88355052	88357993
m111	chr9	88419576	88422084
m111	chr9	89558713	89564727
m111	chr9	94181829	94187999
m111	chr9	96792245	96794683
m111	chr9	98264201	98280160
m111	chr9	102580196	102588106
m111	chr9	103188321	103192290
m111	chr9	114244182	114247318
m111	chr9	116637963	116640840
m111	chr9	120172552	120178540
m111	chrX	11805842	11806020
m111	chrX	18692337	18693963
m111	chrX	39963808	39969477
m111	chrX	40011366	40015034
m111	chrX	57147232	57148629
m111	chrX	57935724	57938218
m111	chrX	73639480	73644187
m111	chrX	90689597	90690994
m111	chrX	103172621	103174545
m111	chrX	107068401	107070998
m111	chrX	128674070	128675606
m111	chrX	131349665	131354072
m112	chr1	8760486	8765669
m112	chr1	10269334	10274331
m112	chr1	11966874	11971033
m112	chr1	14026033	14029661
m112	chr1	22777077	22781126
m112	chr1	31535507	31539189
m112	chr1	39655591	39659638
m112	chr1	40838147	40844046
m112	chr1	41155870	41160229
m112	chr1	46595267	46601203
m112	chr1	59010372	59013398
m112	chr1	61435639	61436413
m112	chr1	61541350	61561426
m112	chr1	62899989	62904678
m112	chr1	70818225	70821771
m112	chr1	79083127	79090088
m112	chr1	93421559	93428996
m112	chr1	113007030	113010106
m112	chr1	113159921	113164467
m112	chr1	120904679	120906356
m112	chr1	145381309	145383340
m112	chr1	147010492	147015684
m112	chr1	147735132	147736582
m112	chr1	148241481	148242071
m112	chr1	149222334	149225551
m112	chr1	161368411	161370952
m112	chr1	161499489	161503124
m112	chr1	161509513	161510018
m112	chr1	161581476	161583020
m112	chr1	167682537	167686302
m112	chr1	180988737	180993870
m112	chr1	200637730	200640324
m112	chr1	211430152	211434931
m112	chr1	212457650	212464861
m112	chr1	216773184	216775705
m112	chr1	226247528	226255337
m112	chr1	227502046	227509376
m112	chr1	232755826	232757095
m112	chr1	235665762	235670176
m112	chr1	244209993	244228913
m112	chr1	245131673	245136920
m112	chr1	249166343	249168827
m112	chr10	20101650	20109290
m112	chr10	21797129	21825811
m112	chr10	22289925	22293455
m112	chr10	22517008	22520100
m112	chr10	22539194	22544282
m112	chr10	30403881	30404571
m112	chr10	32339311	32346642
m112	chr10	33243695	33248915
m112	chr10	52378437	52386671
m112	chr10	60024214	60030302
m112	chr10	65387603	65392086
m112	chr10	69522503	69525653
m112	chr10	75934265	75938259
m112	chr10	76690644	76692876
m112	chr10	89620081	89631121
m112	chr10	93167768	93173317
m112	chr10	111763052	111773658
m112	chr10	126604161	126607648
m112	chr11	9634184	9637045
m112	chr11	10877030	10881780
m112	chr11	11862037	11869311
m112	chr11	12694879	12703188
m112	chr11	33721548	33723844
m112	chr11	43701345	43703985
m112	chr11	47786322	47790509
m112	chr11	86747057	86751057
m112	chr11	94798702	94804288
m112	chr11	102187178	102188838
m112	chr11	107991270	107995569
m112	chr11	109962398	109968277
m112	chr11	111471130	111478282
m112	chr11	113110696	113115555
m112	chr11	113976621	113982698
m112	chr11	115368839	115376458
m112	chr12	8122200	8124397
m112	chr12	10364495	10370041
m112	chr12	11801422	11807400
m112	chr12	12763943	12767896
m112	chr12	12865624	12880032
m112	chr12	14517832	14520856
m112	chr12	25402209	25405304
m112	chr12	25537578	25540824
m112	chr12	26110172	26115088
m112	chr12	26265777	26281428
m112	chr12	27163235	27169369
m112	chr12	32831829	32834347
m112	chr12	46116567	46127687
m112	chr12	46380940	46386705
m112	chr12	54067936	54073630
m112	chr12	66562271	66564334
m112	chr12	69200726	69203331
m112	chr12	70999389	71004748
m112	chr12	76475834	76480462
m112	chr12	89915325	89921614
m112	chr12	93320309	93324489
m112	chr12	94070465	94073650
m112	chr12	95607646	95613860
m112	chr12	98896567	98898454
m112	chr12	100535072	100537457
m112	chr12	117625431	117628945
m112	chr12	120727666	120731749
m112	chr12	125411538	125414099
m112	chr12	125422178	125425982
m112	chr13	22177426	22179084
m112	chr13	28021700	28026236
m112	chr13	28192114	28197433
m112	chr13	30418535	30425592
m112	chr13	31035739	31040898
m112	chr13	31247546	31248941
m112	chr13	36917702	36922352
m112	chr13	40173160	40178948
m112	chr13	44721483	44722924
m112	chr13	45491301	45494173
m112	chr13	49104592	49108544
m112	chr13	52022487	52029381
m112	chr13	77565392	77568545
m112	chr13	97760631	97768302
m112	chr14	21076869	21083324
m112	chr14	21148240	21155657
m112	chr14	31492095	31496900
m112	chr14	32542031	32550263
m112	chr14	32669928	32673704
m112	chr14	33401459	33413328
m112	chr14	39571299	39574704
m112	chr14	50327113	50332506
m112	chr14	55347985	55349186
m112	chr14	55516580	55520323
m112	chr14	60630497	60634730
m112	chr14	62161048	62166067
m112	chr14	77419595	77425002
m112	chr14	79031769	79033805
m112	chr14	80522336	80522572
m112	chr14	81635071	81638424
m112	chr14	90845179	90852370
m112	chr14	102989876	102992153
m112	chr15	22832656	22836603
m112	chr15	35836222	35840081
m112	chr15	37175227	37176672
m112	chr15	37307977	37308740
m112	chr15	38542712	38550679
m112	chr15	45018589	45024299
m112	chr15	45489743	45494167
m112	chr15	56533289	56538675
m112	chr15	59466500	59467998
m112	chr15	63447711	63450732
m112	chr15	64799275	64799848
m112	chr15	65587682	65592480
m112	chr15	66082088	66086130
m112	chr15	72407556	72411672
m112	chr15	77708832	77714569
m112	chr15	79164399	79167846
m112	chr15	80187807	80191014
m112	chr15	100103427	100109827
m112	chr16	22199637	22204396
m112	chr16	57331155	57336107
m112	chr16	58425984	58427297
m112	chr16	73265671	73268611
m112	chr17	1300483	1304168
m112	chr17	8123328	8128827
m112	chr17	19993434	20000533
m112	chr17	25620350	25624629
m112	chr17	47268091	47271910
m112	chr17	47751970	47755986
m112	chr17	48937674	48946446
m112	chr17	56735245	56737375
m112	chr17	66015589	66017208
m112	chr18	5292698	5298278
m112	chr18	20512083	20514446
m112	chr18	29670694	29676624
m112	chr18	44494349	44498742
m112	chr18	47337565	47341372
m112	chr18	48719222	48724959
m112	chr18	53443870	53449620
m112	chr18	56526199	56539639
m112	chr18	60980275	60990433
m112	chr18	74819306	74821056
m112	chr18	76828313	76831026
m112	chr19	20148268	20150883
m112	chr19	20605112	20607994
m112	chr19	20747247	20749606
m112	chr19	47607804	47617924
m112	chr19	52551088	52553088
m112	chr2	25285003	25288878
m112	chr2	46087374	46088538
m112	chr2	48129461	48135038
m112	chr2	59476554	59477574
m112	chr2	61107317	61114257
m112	chr2	61761936	61767405
m112	chr2	61990111	61992112
m112	chr2	64067058	64072241
m112	chr2	64366763	64372125
m112	chr2	64975815	64980023
m112	chr2	64993786	64998216
m112	chr2	70348976	70355515
m112	chr2	88923919	88928500
m112	chr2	128143101	128147750
m112	chr2	136286853	136291829
m112	chr2	152116932	152119378
m112	chr2	157255679	157258744
m112	chr2	160468867	160474755
m112	chr2	174826811	174832027
m112	chr2	176030981	176034429
m112	chr2	178075543	178080927
m112	chr2	187453668	187457485
m112	chr2	190536609	190540442
m112	chr2	191510665	191517730
m112	chr2	198378237	198382331
m112	chr2	202506553	202510055
m112	chr2	206947766	206953252
m112	chr2	208023774	208032814
m112	chr2	211031170	211037697
m112	chr2	213397398	213405281
m112	chr20	5588361	5592322
m112	chr20	40321084	40322860
m112	chr20	42085178	42088575
m112	chr20	45901223	45907431
m112	chr20	46129297	46132789
m112	chr20	52530718	52534622
m112	chr21	32714942	32717101
m112	chr21	34912756	34918174
m112	chr22	36421671	36426177
m112	chr22	36460867	36463045
m112	chr22	36717987	36741699
m112	chr22	41486524	41493186
m112	chr22	42062420	42063689
m112	chr3	4908342	4911154
m112	chr3	11675567	11685975
m112	chr3	12702494	12706513
m112	chr3	23985619	23990330
m112	chr3	28387946	28391528
m112	chr3	32542067	32545268
m112	chr3	44377992	44382352
m112	chr3	71108309	71117380
m112	chr3	81809253	81812577
m112	chr3	87137520	87140429
m112	chr3	105083798	105091586
m112	chr3	112021630	112024177
m112	chr3	115376700	115379920
m112	chr3	143688967	143698803
m112	chr3	145873621	145880614
m112	chr3	150123795	150134014
m112	chr3	150320301	150324048
m112	chr3	151982989	151990245
m112	chr3	169489369	169494028
m112	chr3	171110761	171111451
m112	chr3	174156528	174160873
m112	chr3	183352557	183356581
m112	chr3	191045883	191050809
m112	chr3	195160960	195165078
m112	chr4	47486092	47489845
m112	chr4	77992760	77999264
m112	chr4	78075592	78081823
m112	chr4	78737953	78743500
m112	chr4	83205439	83206949
m112	chr4	83347384	83353692
m112	chr4	87926113	87932520
m112	chr4	96457547	96474635
m112	chr4	99388218	99390585
m112	chr4	99847937	99851715
m112	chr4	103743848	103750845
m112	chr4	106066455	106071096
m112	chr4	106391191	106395699
m112	chr4	113151490	113155710
m112	chr4	114676934	114684779
m112	chr4	129473632	129475371
m112	chr4	140002295	140006924
m112	chr4	140735429	140737923
m112	chr4	140968288	140971856
m112	chr4	144433560	144438776
m112	chr4	144479529	144481217
m112	chr4	156873164	156875865
m112	chr4	169400368	169402817
m112	chr4	174288247	174295730
m112	chr4	174334729	174339393
m112	chr4	185304109	185305989
m112	chr5	36873450	36881243
m112	chr5	43063690	43069574
m112	chr5	43482609	43486112
m112	chr5	53603409	53607911
m112	chr5	55775202	55778315
m112	chr5	61439744	61439997
m112	chr5	64329744	64333174
m112	chr5	76785888	76789412
m112	chr5	79377691	79382334
m112	chr5	79547528	79554359
m112	chr5	79702080	79707508
m112	chr5	87435749	87442622
m112	chr5	90575142	90577576
m112	chr5	95065777	95072809
m112	chr5	95169752	95172468
m112	chr5	98261389	98267558
m112	chr5	108082633	108086383
m112	chr5	114935034	114939127
m112	chr5	122846911	122850801
m112	chr5	132296154	132300269
m112	chr5	150136595	150139446
m112	chr5	180610658	180612202
m112	chr6	2987307	2992067
m112	chr6	12012641	12014290
m112	chr6	15244474	15251292
m112	chr6	15399888	15406533
m112	chr6	25991671	25994382
m112	chr6	26020580	26023217
m112	chr6	26170342	26175389
m112	chr6	26284431	26287014
m112	chr6	26520279	26523205
m112	chr6	27444925	27448047
m112	chr6	28302013	28305451
m112	chr6	28805104	28807862
m112	chr6	28861958	28865647
m112	chr6	28948232	28954219
m112	chr6	30175141	30182761
m112	chr6	31164355	31166820
m112	chr6	36408320	36413607
m112	chr6	42747754	42756152
m112	chr6	45343829	45347064
m112	chr6	47443983	47448415
m112	chr6	53211395	53214679
m112	chr6	56403267	56409092
m112	chr6	64281070	64285143
m112	chr6	71121968	71125886
m112	chr6	76307496	76313949
m112	chr6	79941958	79945069
m112	chr6	90927542	90930284
m112	chr6	99871207	99876021
m112	chr6	99968169	99970712
m112	chr6	108615285	108617871
m112	chr6	111194581	111204722
m112	chr6	111799133	111807049
m112	chr6	117001455	117004291
m112	chr6	119212296	119217792
m112	chr6	121655015	121656978
m112	chr6	131380776	131385681
m112	chr6	136608897	136612720
m112	chr6	143380330	143384190
m112	chr6	149636954	149645887
m112	chr6	157340282	157345580
m112	chr7	7220907	7225765
m112	chr7	8007172	8013456
m112	chr7	21465950	21471689
m112	chr7	23568687	23572265
m112	chr7	32928238	32933832
m112	chr7	64125763	64128226
m112	chr7	91568719	91573056
m112	chr7	91760257	91765293
m112	chr7	91808051	91810036
m112	chr7	94281953	94288493
m112	chr7	104647251	104659564
m112	chr7	111842403	111847850
m112	chr7	112428802	112431265
m112	chr7	129911876	129914974
m112	chr7	130724204	130725613
m112	chr7	134670447	134672643
m112	chr7	140014563	140016790
m112	chr7	140620704	140625945
m112	chr7	144529991	144533624
m112	chr7	148636585	148639769
m112	chr7	148658740	148662093
m112	chr7	148679533	148686197
m112	chr7	152159893	152162759
m112	chr8	26184440	26185499
m112	chr8	26431738	26461852
m112	chr8	27131755	27132693
m112	chr8	33367773	33374176
m112	chr8	38236410	38245522
m112	chr8	38851820	38857826
m112	chr8	59464706	59468276
m112	chr8	64078681	64084537
m112	chr8	66749860	66755607
m112	chr8	67024502	67028009
m112	chr8	71579431	71582535
m112	chr8	74788945	74792643
m112	chr8	81397172	81402198
m112	chr8	90768248	90773602
m112	chr8	101318369	101323592
m112	chr8	101730267	101736525
m112	chr8	103420885	103425696
m112	chr8	104116884	104118684
m112	chr8	117884712	117887593
m112	chr8	124283255	124289349
m112	chr8	132913950	132920660
m112	chr9	2013465	2023707
m112	chr9	3522243	3528973
m112	chr9	14203069	14203691
m112	chr9	27570996	27574838
m112	chr9	33043288	33045304
m112	chr9	73024236	73037860
m112	chr9	80640074	80651135
m112	chr9	86235990	86239429
m112	chr9	86321112	86324328
m112	chr9	86589993	86597221
m112	chr9	87652894	87659902
m112	chr9	96926923	96932272
m112	chr9	110398310	110401526
m112	chr9	115093070	115097231
m112	chr9	115139939	115143592
m112	chrX	2242865	2244131
m112	chrX	11775238	11779580
m112	chrX	12988482	12998087
m112	chrX	15870795	15875030
m112	chrX	17753916	17757346
m112	chrX	40942897	40950156
m112	chrX	41189444	41199075
m112	chrX	41780791	41784083
m112	chrX	44730521	44735708
m112	chrX	47400213	47401287
m112	chrX	73832160	73835121
m112	chrX	77394324	77395723
m112	chrX	83755930	83757992
m112	chrX	100912936	100915285
m112	chrX	101185178	101187116
m112	chrX	110924010	110926225
m112	chrX	117478990	117482946
m112	chrX	118737601	118741334
m112	chrX	123092643	123098652
m112	chrX	128655482	128658112
m112	chrX	134653984	134657048
m112	chrX	144897295	144910976
m112	chrX	146992673	146996056
m113	chr1	21500186	21505073
m113	chr1	26247644	26251077
m113	chr1	33438042	33439038
m113	chr1	57109717	57112872
m113	chr1	59245391	59252769
m113	chr1	62207191	62209777
m113	chr1	65773875	65778121
m113	chr1	70031864	70038833
m113	chr1	76619397	76620957
m113	chr1	82264894	82270480
m113	chr1	85084355	85087356
m113	chr1	87595593	87601836
m113	chr1	99729370	99732588
m113	chr1	103571454	103575521
m113	chr1	107598764	107601845
m113	chr1	107682314	107686512
m113	chr1	143743165	143744568
m113	chr1	145394458	145400102
m113	chr1	147805850	147807938
m113	chr1	162791682	162793914
m113	chr1	164289664	164291037
m113	chr1	179555057	179555922
m113	chr1	186648289	186652069
m113	chr1	196576457	196578718
m113	chr1	214453272	214456718
m113	chr1	220699700	220704527
m113	chr1	244079809	244082146
m113	chr1	245329753	245330087
m113	chr1	246886801	246890512
m113	chr10	3526857	3527136
m113	chr10	18916037	18916932
m113	chr10	25401829	25402633
m113	chr10	44787652	44789204
m113	chr10	52499006	52500664
m113	chr10	54067999	54069369
m113	chr10	57390047	57391516
m113	chr10	61663407	61668852
m113	chr10	63656628	63665632
m113	chr10	90638297	90642556
m113	chr10	91402110	91406911
m113	chr10	115931684	115934986
m113	chr10	118895962	118898553
m113	chr11	10825800	10831927
m113	chr11	17227594	17231661
m113	chr11	22687463	22689541
m113	chr11	44086965	44088888
m113	chr11	59316593	59320608
m113	chr11	59322985	59326109
m113	chr11	59326517	59329390
m113	chr11	73468951	73472947
m113	chr11	75944726	75948180
m113	chr11	77179921	77186168
m113	chr11	86663382	86669506
m113	chr11	94961339	94967078
m113	chr11	103552909	103553832
m113	chr11	112831413	112838102
m113	chr11	125361430	125367220
m113	chr11	130294531	130300211
m113	chr11	131239971	131247222
m113	chr12	1696442	1706351
m113	chr12	10305657	10307125
m113	chr12	12501320	12504448
m113	chr12	21679908	21682637
m113	chr12	22694283	22698143
m113	chr12	25053533	25057823
m113	chr12	29300874	29307366
m113	chr12	32258609	32264291
m113	chr12	39833863	39838481
m113	chr12	40617287	40620952
m113	chr12	42875062	42878854
m113	chr12	46658845	46664540
m113	chr12	49759191	49763676
m113	chr12	59987761	59993314
m113	chr12	64060171	64063411
m113	chr12	71058186	71058617
m113	chr12	76422231	76427152
m113	chr12	82150532	82154490
m113	chr12	85303291	85307619
m113	chr12	88970885	88974814
m113	chr12	89738961	89750899
m113	chr12	90098504	90105631
m113	chr12	93963105	93968024
m113	chr12	93984809	93985903
m113	chr12	94286351	94289049
m113	chr12	95466004	95468988
m113	chr12	96181983	96186305
m113	chr12	96641718	96643530
m113	chr12	103354789	103356276
m113	chr12	128849188	128851305
m113	chr13	20355580	20357610
m113	chr13	50016990	50019816
m113	chr13	51482559	51487511
m113	chr13	75149204	75151234
m113	chr13	75793681	75794435
m113	chr13	77897472	77904977
m113	chr13	80908721	80917965
[truncated: 23,269 more rows]

## Sheet: mRNA module
module	Geneid	Symbol
m1	ENSG00000167578	RAB4B
m1	ENSG00000179262	RAD23A
m1	ENSG00000101199	ARFGAP1
m1	ENSG00000250571	GLI4
m1	ENSG00000205220	PSMB10
m1	ENSG00000138375	SMARCAL1
m1	ENSG00000183570	PCBP3
m1	ENSG00000110442	COMMD9
m1	ENSG00000180089	TMEM86B
m1	ENSG00000257246	RP11-416A17.6
m1	ENSG00000103043	VAC14
m1	ENSG00000021762	OSBPL5
m1	ENSG00000214435	AS3MT
m1	ENSG00000105705	SUGP1
m1	ENSG00000156521	TYSND1
m1	ENSG00000142856	ITGB3BP
m1	ENSG00000161996	WDR90
m1	ENSG00000025770	NCAPH2
m1	ENSG00000141577	AZI1
m1	ENSG00000136490	LIMD2
m1	ENSG00000135596	MICAL1
m1	ENSG00000010256	UQCRC1
m1	ENSG00000173818	ENDOV
m1	ENSG00000182109	RP11-69E11.4
m1	ENSG00000026036	RTEL1-TNFRSF6B
m1	ENSG00000227304	RP11-791G16.2
m1	ENSG00000205078	SYCE1L
m1	ENSG00000169682	SPNS1
m1	ENSG00000105204	DYRK1B
m1	ENSG00000169905	TOR1AIP2
m1	ENSG00000033011	ALG1
m1	ENSG00000033170	FUT8
m1	ENSG00000168734	PKIG
m1	ENSG00000141699	FAM134C
m1	ENSG00000248859	RP11-375B1.3
m1	ENSG00000227953	RP11-439E19.3
m1	ENSG00000122417	ODF2L
m1	ENSG00000214696	AC007347.1
m1	ENSG00000261599	HERC2P8
m1	ENSG00000133619	KRBA1
m1	ENSG00000130244	FAM98C
m1	ENSG00000138111	TMEM180
m1	ENSG00000099866	MADCAM1
m1	ENSG00000204237	OXLD1
m1	ENSG00000154743	TSEN2
m1	ENSG00000131848	ZSCAN5A
m1	ENSG00000183696	UPP1
m1	ENSG00000004777	ARHGAP33
m1	ENSG00000104979	C19orf53
m1	ENSG00000186501	TMEM222
m1	ENSG00000100416	TRMU
m1	ENSG00000173692	PSMD1
m1	ENSG00000089195	TRMT6
m1	ENSG00000243789	JMJD7
m1	ENSG00000070423	RNF126
m1	ENSG00000175634	RPS6KB2
m1	ENSG00000006015	C19orf60
m1	ENSG00000260539	RP11-252A24.7
m1	ENSG00000119203	CPSF3
m1	ENSG00000149636	DSN1
m1	ENSG00000177000	MTHFR
m1	ENSG00000137700	SLC37A4
m1	ENSG00000160948	VPS28
m1	ENSG00000160072	ATAD3B
m1	ENSG00000257540	RP11-259K21.3
m1	ENSG00000158773	USF1
m1	ENSG00000130748	TMEM160
m1	ENSG00000090932	DLL3
m1	ENSG00000182473	EXOC7
m1	ENSG00000146556	WASH2P
m1	ENSG00000099899	TRMT2A
m1	ENSG00000141744	PNMT
m1	ENSG00000135940	COX5B
m1	ENSG00000229801	RP11-353N4.1
m1	ENSG00000160392	C19orf47
m1	ENSG00000125743	SNRPD2
m1	ENSG00000110844	PRPF40B
m1	ENSG00000260077	RP11-254F7.2
m1	ENSG00000132600	PRMT7
m1	ENSG00000163093	BBS5
m1	ENSG00000167671	UBXN6
m1	ENSG00000100982	PCIF1
m1	ENSG00000147813	NAPRT1
m1	ENSG00000145014	TMEM44
m1	ENSG00000196358	NTNG2
m1	ENSG00000167468	GPX4
m1	ENSG00000221990	C5orf55
m1	ENSG00000197323	TRIM33
m1	ENSG00000223356	RP11-66D17.5
m1	ENSG00000261879	RP11-333E1.1
m1	ENSG00000167799	NUDT8
m1	ENSG00000168778	TCTN2
m1	ENSG00000083838	ZNF446
m1	ENSG00000130005	GAMT
m1	ENSG00000219435	C11orf20
m1	ENSG00000126107	HECTD3
m1	ENSG00000213619	NDUFS3
m1	ENSG00000136908	DPM2
m1	ENSG00000184967	NOC4L
m1	ENSG00000103042	SLC38A7
m1	ENSG00000126709	IFI6
m1	ENSG00000257556	RP11-44N21.1
m1	ENSG00000171695	C20orf201
m1	ENSG00000100360	IFT27
m1	ENSG00000135702	CHST5
m1	ENSG00000226091	RP11-90D4.2
m1	ENSG00000080823	MOK
m1	ENSG00000015532	XYLT2
m1	ENSG00000118194	TNNT2
m1	ENSG00000146215	CRIP3
m1	ENSG00000197498	RPF2
m1	ENSG00000189306	RRP7A
m1	ENSG00000151474	FRMD4A
m1	ENSG00000105419	MEIS3
m1	ENSG00000099821	POLRMT
m1	ENSG00000104522	TSTA3
m1	ENSG00000177679	SRRM3
m1	ENSG00000221838	AP4M1
m1	ENSG00000166166	TRMT61A
m1	ENSG00000100023	PPIL2
m1	ENSG00000117480	FAAH
m1	ENSG00000030110	BAK1
m1	ENSG00000260872	RP11-680G24.5
m1	ENSG00000116883	AL591845.1
m1	ENSG00000176909	MAMSTR
m1	ENSG00000140983	RHOT2
m1	ENSG00000263072	RP11-473M20.14
m1	ENSG00000139266	MARCH9
m1	ENSG00000103199	ZNF500
m1	ENSG00000171811	TTC40
m1	ENSG00000075399	C16orf7
m1	ENSG00000185614	FAM212A
m1	ENSG00000128218	VPREB3
m1	ENSG00000228594	C1orf233
m1	ENSG00000162066	AMDHD2
m1	ENSG00000138101	DTNB
m1	ENSG00000166741	NNMT
m1	ENSG00000099624	ATP5D
m1	ENSG00000007923	DNAJC11
m1	ENSG00000196700	ZNF512B
m1	ENSG00000267368	UPK3BL
m1	ENSG00000167670	CHAF1A
m1	ENSG00000163701	IL17RE
m1	ENSG00000115274	INO80B
m1	ENSG00000235863	B3GALT4
m1	ENSG00000115275	MOGS
m1	ENSG00000267655	CTD-2286N8.2
m1	ENSG00000214645	AL162389.1
m1	ENSG00000169696	ASPSCR1
m1	ENSG00000235663	SAPCD1-AS1
m1	ENSG00000203993	C9orf37
m1	ENSG00000234917	RP5-994D16.3
m1	ENSG00000203546	RP11-176H8.1
m1	ENSG00000161544	CYGB
m1	ENSG00000061656	SPAG4
m1	ENSG00000204843	DCTN1
m1	ENSG00000135372	NAT10
m1	ENSG00000136274	NACAD
m1	ENSG00000223403	MEG9
m1	ENSG00000183605	SFXN4
m1	ENSG00000115255	REEP6
m1	ENSG00000162572	SCNN1D
m1	ENSG00000166313	APBB1
m1	ENSG00000105486	LIG1
m1	ENSG00000059122	FLYWCH1
m1	ENSG00000214597	TMEM249
m1	ENSG00000130725	UBE2M
m1	ENSG00000100726	TELO2
m1	ENSG00000070388	FGF22
m1	ENSG00000260778	hsa-mir-940
m1	ENSG00000173272	MZT2A
m1	ENSG00000103363	TCEB2
m1	ENSG00000259313	CTA-313A17.5
m1	ENSG00000235117	RP11-229P13.20
m1	ENSG00000085998	POMGNT1
m1	ENSG00000171703	TCEA2
m1	ENSG00000167595	C19orf55
m1	ENSG00000164053	ATRIP
m1	ENSG00000266967	AARSD1
m1	ENSG00000255135	RP11-111M22.3
m1	ENSG00000187741	FANCA
m1	ENSG00000186010	NDUFA13
m1	ENSG00000233368	RP11-277L2.3
m1	ENSG00000169131	ZNF354A
m1	ENSG00000167394	ZNF668
m1	ENSG00000229852	RP11-398K22.12
m1	ENSG00000213347	MXD3
m1	ENSG00000116649	SRM
m1	ENSG00000206176	AC023490.1
m1	ENSG00000078814	MYH7B
m1	ENSG00000261064	RP11-1000B6.3
m1	ENSG00000177302	TOP3A
m1	ENSG00000225138	CTD-2228K2.7
m1	ENSG00000165591	FAAH2
m1	ENSG00000102103	PQBP1
m1	ENSG00000185347	C14orf80
m1	ENSG00000110200	ANAPC15
m1	ENSG00000108469	RECQL5
m1	ENSG00000126247	CAPNS1
m1	ENSG00000188372	ZP3
m1	ENSG00000110921	MVK
m1	ENSG00000162461	SLC25A34
m1	ENSG00000159714	ZDHHC1
m1	ENSG00000248671	CTD-2313N18.5
m1	ENSG00000136425	CIB2
m1	ENSG00000160439	RDH13
m1	ENSG00000204377	C1orf134
m1	ENSG00000130299	GTPBP3
m1	ENSG00000164081	TEX264
m1	ENSG00000147481	SNTG1
m1	ENSG00000152467	ZSCAN1
m1	ENSG00000140104	C14orf79
m1	ENSG00000245937	CTC-228N24.3
m1	ENSG00000182973	CNOT10
m1	ENSG00000188290	HES4
m1	ENSG00000121410	A1BG
m1	ENSG00000140451	PIF1
m1	ENSG00000204859	ZBTB48
m1	ENSG00000267632	RP11-400F19.18
m1	ENSG00000174365	SNHG11
m1	ENSG00000204536	CCHCR1
m1	ENSG00000242612	DECR2
m1	ENSG00000144524	COPS7B
m1	ENSG00000246922	UBAP1L
m1	ENSG00000172197	MBOAT1
m1	ENSG00000250616	RP11-455F5.3
m1	ENSG00000005238	FAM214B
m1	ENSG00000074582	BCS1L
m1	ENSG00000178821	TMEM52
m1	ENSG00000162004	CCDC78
m1	ENSG00000199916	RMRP
m1	ENSG00000263053	RP11-1055B8.6
m1	ENSG00000185019	UBOX5
m1	ENSG00000169020	ATP5I
m1	ENSG00000130640	TUBGCP2
m1	ENSG00000075624	ACTB
m1	ENSG00000204564	C6orf136
m1	ENSG00000011478	QPCTL
m1	ENSG00000187608	ISG15
m1	ENSG00000196465	MYL6B
m1	ENSG00000260644	HERC2P5
m1	ENSG00000234912	LINC00338
m1	ENSG00000267053	CTD-3162L10.1
m1	ENSG00000159239	C2orf81
m1	ENSG00000196372	ASB13
m1	ENSG00000179862	CITED4
m1	ENSG00000076650	GPATCH1
m1	ENSG00000095906	NUBP2
m1	ENSG00000184916	JAG2
m1	ENSG00000221946	FXYD7
m1	ENSG00000165194	PCDH19
m1	ENSG00000103152	MPG
m1	ENSG00000167508	MVD
m1	ENSG00000169964	TMEM42
m1	ENSG00000218739	AC007390.5
m1	ENSG00000127586	CHTF18
m1	ENSG00000206145	P2RX6P
m1	ENSG00000197102	DYNC1H1
m1	ENSG00000100116	GCAT
m1	ENSG00000233483	CTD-2020K17.4
m1	ENSG00000184110	EIF3C
m1	ENSG00000214988	RPL7AP26
m1	ENSG00000104884	ERCC2
m1	ENSG00000197927	C2orf27A
m1	ENSG00000175756	AURKAIP1
m1	ENSG00000072818	ACAP1
m1	ENSG00000149483	TMEM138
m1	ENSG00000007541	PIGQ
m1	ENSG00000104129	DNAJC17
m1	ENSG00000173171	MTX1
m1	ENSG00000162769	FLVCR1
m1	ENSG00000261613	RP11-20I23.8
m1	ENSG00000141002	TCF25
m1	ENSG00000204771	CTD-3232M19.2
m1	ENSG00000141456	PELP1
m1	ENSG00000188690	UROS
m1	ENSG00000117308	GALE
m1	ENSG00000204469	PRRC2A
m1	ENSG00000251503	APITD1-CORT
m1	ENSG00000101470	TNNC2
m1	ENSG00000153237	CCDC148
m1	ENSG00000184436	THAP7
m1	ENSG00000101940	WDR13
m1	ENSG00000238103	RPL9P7
m1	ENSG00000168701	TMEM208
m1	ENSG00000060491	OGFR
m1	ENSG00000158552	ZFAND2B
m1	ENSG00000227507	LTB
m1	ENSG00000205309	NT5M
m1	ENSG00000099917	MED15
m1	ENSG00000103707	MTFMT
m1	ENSG00000205704	LINC00634
m1	ENSG00000104886	PLEKHJ1
m1	ENSG00000099795	NDUFB7
m1	ENSG00000148291	SURF2
m1	ENSG00000014216	CAPN1
m1	ENSG00000139180	NDUFA9
m1	ENSG00000100749	VRK1
m1	ENSG00000148814	LRRC27
m1	ENSG00000255618	RP11-357K6.1
m1	ENSG00000065057	NTHL1
m1	ENSG00000128973	CLN6
m1	ENSG00000099785	MARCH2
m1	ENSG00000173581	CCDC106
m1	ENSG00000069020	MAST4
m1	ENSG00000179304	FAM156B
m1	ENSG00000241553	ARPC4
m1	ENSG00000196408	NOXO1
m1	ENSG00000173163	COMMD1
m1	ENSG00000177628	GBA
m1	ENSG00000164880	INTS1
m1	ENSG00000233579	KRT8P15
m1	ENSG00000260565	ERVK13-1
m1	ENSG00000141994	DUS3L
m1	ENSG00000261255	CTD-2012K14.1
m1	ENSG00000206082	AC010507.5
m1	ENSG00000157388	CACNA1D
m1	ENSG00000168591	TMUB2
m1	ENSG00000139899	CBLN3
m1	ENSG00000176248	ANAPC2
m1	ENSG00000164080	RAD54L2
m1	ENSG00000100284	TOM1
m1	ENSG00000258315	C17orf49
m1	ENSG00000183751	TBL3
m1	ENSG00000172977	KAT5
m1	ENSG00000141562	NARF
m1	ENSG00000146707	POMZP3
m1	ENSG00000250479	CHCHD10
m1	ENSG00000204351	SKIV2L
m1	ENSG00000163481	RNF25
m1	ENSG00000178467	P4HTM
m1	ENSG00000133030	MPRIP
m1	ENSG00000258986	TMEM179
m1	ENSG00000160226	C21orf2
m1	ENSG00000176293	ZNF135
m1	ENSG00000187186	RP11-195F19.5
m1	ENSG00000126903	SLC10A3
m1	ENSG00000175550	DRAP1
m1	ENSG00000115257	PCSK4
m1	ENSG00000166452	AKIP1
m1	ENSG00000088340	FER1L4
m1	ENSG00000002822	MAD1L1
m1	ENSG00000148341	SH3GLB2
m1	ENSG00000139624	CERS5
m1	ENSG00000099330	OCEL1
m1	ENSG00000227280	RP11-458D21.2
m1	ENSG00000260196	RP1-239B22.5
m1	ENSG00000104731	KLHDC4
m1	ENSG00000173338	KCNK7
m1	ENSG00000160284	C21orf56
m1	ENSG00000232406	RP11-234K24.3
m1	ENSG00000187609	EXD3
m1	ENSG00000130305	NSUN5
m1	ENSG00000170161	RP11-262H14.4
m1	ENSG00000174791	RIN1
m1	ENSG00000261220	RP11-629O1.2
m1	ENSG00000126883	NUP214
m1	ENSG00000178028	DMAP1
m1	ENSG00000100258	LMF2
m1	ENSG00000101220	C20orf27
m1	ENSG00000072195	SPEG
m1	ENSG00000259888	CTD-2540M10.1
m1	ENSG00000260025	RP11-490M8.1
m1	ENSG00000131969	ABHD12B
m1	ENSG00000132207	SLX1A
m1	ENSG00000217930	PAM16
m1	ENSG00000171222	SCAND1
m1	ENSG00000165055	METTL2B
m1	ENSG00000125877	ITPA
m1	ENSG00000187624	C17orf97
m1	ENSG00000149531	FRG1B
m1	ENSG00000183011	LSMD1
m1	ENSG00000198870	C9orf96
m1	ENSG00000184470	TXNRD2
m1	ENSG00000005961	ITGA2B
m1	ENSG00000167705	RILP
m1	ENSG00000063761	ADCK1
m1	ENSG00000183979	NPB
m1	ENSG00000147804	SLC39A4
m1	ENSG00000158106	RHPN1
m1	ENSG00000181029	TRAPPC5
m1	ENSG00000180096	SEPT1
m1	ENSG00000168096	ANKS3
m1	ENSG00000183258	DDX41
m1	ENSG00000178026	FAM211B
m1	ENSG00000265787	CYP4F35P
m1	ENSG00000257499	RP11-571M6.8
m1	ENSG00000187953	PMS2CL
m1	ENSG00000169180	XPO6
m1	ENSG00000104835	FBXO17
m1	ENSG00000196189	SEMA4A
m1	ENSG00000129946	SHC2
m1	ENSG00000105472	CLEC11A
m1	ENSG00000242798	RP11-506M12.1
m1	ENSG00000123159	GIPC1
m1	ENSG00000132394	EEFSEC
m1	ENSG00000127419	TMEM175
m1	ENSG00000043514	TRIT1
m1	ENSG00000188227	ZNF793
m1	ENSG00000204248	COL11A2
m1	ENSG00000236668	RP11-85O21.2
m1	ENSG00000169727	GPS1
m1	ENSG00000254635	RP11-164A7.1
m1	ENSG00000243667	WDR92
m1	ENSG00000187688	TRPV2
m1	ENSG00000234585	CCT6P3
m1	ENSG00000159055	MIS18A
m1	ENSG00000128185	DGCR6L
m1	ENSG00000188130	MAPK12
m1	ENSG00000164953	TMEM67
m1	ENSG00000167967	E4F1
m1	ENSG00000108474	PIGL
m1	ENSG00000105639	JAK3
m1	ENSG00000105717	PBX4
m1	ENSG00000184451	CCR10
m1	ENSG00000227232	WASH7P
m1	ENSG00000219200	RNASEK
m1	ENSG00000102390	CXorf26
m1	ENSG00000055955	ITIH4
m1	ENSG00000131116	ZNF428
m1	ENSG00000160282	FTCD
m1	ENSG00000161179	YDJC
m1	ENSG00000214014	OVCA2
m1	ENSG00000133250	ZNF414
m1	ENSG00000026652	AGPAT4
m1	ENSG00000076924	XAB2
m1	ENSG00000127616	SMARCA4
m1	ENSG00000231963	RP11-493K23.4
m1	ENSG00000196405	EVL
m1	ENSG00000159214	CCDC24
m1	ENSG00000177548	RABEP2
m1	ENSG00000102904	TSNAXIP1
m1	ENSG00000206140	TMEM191C
m1	ENSG00000090006	LTBP4
m1	ENSG00000204371	EHMT2
m1	ENSG00000100288	CHKB
m1	ENSG00000115286	NDUFS7
m1	ENSG00000244479	RP4-798C17.6
m1	ENSG00000177030	DEAF1
m1	ENSG00000163046	ANKRD30BL
m1	ENSG00000160298	C21orf58
m1	ENSG00000147382	FAM58A
m1	ENSG00000150990	DHX37
m1	ENSG00000117408	IPO13
m1	ENSG00000260018	RP11-505K9.1
m1	ENSG00000165688	PMPCA
m1	ENSG00000267121	CTD-2020K17.1
m1	ENSG00000206417	H1FX-AS1
m1	ENSG00000144057	ST6GAL2
m1	ENSG00000091651	ORC6
m1	ENSG00000027001	MIPEP
m1	ENSG00000124784	RIOK1
m1	ENSG00000234635	RP11-9E13.2
m1	ENSG00000168000	BSCL2
m1	ENSG00000260081	RP11-66N11.8
m1	ENSG00000105258	POLR2I
m1	ENSG00000120725	SIL1
m1	ENSG00000242615	CTC-359D24.3
m1	ENSG00000139637	C12orf10
m1	ENSG00000055483	USP36
m1	ENSG00000262943	ALOX12P2
m1	ENSG00000132016	C19orf57
m1	ENSG00000225278	BX571672.5
m1	ENSG00000162241	SLC25A45
m1	ENSG00000163719	MTMR14
m1	ENSG00000175193	PARL
m1	ENSG00000131591	C1orf159
m1	ENSG00000006704	GTF2IRD1
m1	ENSG00000141933	TPGS1
m1	ENSG00000114270	COL7A1
m1	ENSG00000099999	RNF215
m1	ENSG00000101246	ARFRP1
m1	ENSG00000186235	AC016757.3
m1	ENSG00000256872	NOL12
m1	ENSG00000148356	LRSAM1
m1	ENSG00000121680	PEX16
m1	ENSG00000259344	RP11-566K19.6
m1	ENSG00000165684	SNAPC4
m1	ENSG00000223820	CFL1P1
m1	ENSG00000169718	DUS1L
m1	ENSG00000241528	RP1-130H16.16
m1	ENSG00000141499	WRAP53
m1	ENSG00000256269	HMBS
m1	ENSG00000171067	C11orf24
m1	ENSG00000185024	BRF1
m1	ENSG00000095370	SH2D3C
m1	ENSG00000039650	PNKP
m1	ENSG00000178809	TRIM73
m1	ENSG00000176261	ZBTB8OS
m1	ENSG00000214548	MEG3
m1	ENSG00000255495	AC145124.2
m1	ENSG00000221986	MYBPHL
m1	ENSG00000126005	MT1P3
m1	ENSG00000262246	CORO7
m1	ENSG00000234394	RP11-561O23.5
m1	ENSG00000125912	NCLN
m1	ENSG00000148297	MED22
m1	ENSG00000197785	ATAD3A
m1	ENSG00000261971	RP11-473M20.7
m1	ENSG00000260905	RP11-105C19.1
m1	ENSG00000133935	C14orf1
m1	ENSG00000053372	MRTO4
m1	ENSG00000165643	SOHLH1
m1	ENSG00000158806	NPM2
m1	ENSG00000185442	FAM174B
m1	ENSG00000135749	PCNXL2
m1	ENSG00000125901	MRPS26
m1	ENSG00000188738	FSIP2
m1	ENSG00000148396	SEC16A
m1	ENSG00000064995	TAF11
m1	ENSG00000205593	FAM116B
m1	ENSG00000247157	RP11-434C1.1
m1	ENSG00000143374	TARS2
m1	ENSG00000187778	MCRS1
m1	ENSG00000185215	TNFAIP2
m1	ENSG00000114388	NPRL2
m1	ENSG00000173715	C11orf80
m1	ENSG00000198746	GPATCH3
m1	ENSG00000226287	TMEM191A
m1	ENSG00000183648	NDUFB1
m1	ENSG00000087338	GMCL1
m1	ENSG00000137842	TMEM62
m1	ENSG00000078487	ZCWPW1
m1	ENSG00000171148	TADA3
m1	ENSG00000160352	ZNF714
m1	ENSG00000128159	TUBGCP6
m1	ENSG00000179588	ZFPM1
m1	ENSG00000146826	C7orf43
m1	ENSG00000162062	C16orf59
m1	ENSG00000255468	RP11-867G23.8
m1	ENSG00000196756	RP4-564F22.2
m1	ENSG00000149806	FAU
m1	ENSG00000106133	NSUN5P2
m1	ENSG00000107223	EDF1
m1	ENSG00000100888	CHD8
m1	ENSG00000237133	AC020594.5
m1	ENSG00000263020	XXbac-BPG32J3.22
m1	ENSG00000111325	OGFOD2
m1	ENSG00000162910	MRPL55
m1	ENSG00000170310	STX8
m1	ENSG00000170906	NDUFA3
m1	ENSG00000130332	LSM7
m1	ENSG00000171792	RHNO1
m1	ENSG00000188735	TMEM120B
m1	ENSG00000134283	PPHLN1
m1	ENSG00000100918	REC8
m1	ENSG00000226210	ABC7-42389800N19.1
m1	ENSG00000204498	NFKBIL1
m1	ENSG00000010295	IFFO1
m1	ENSG00000242866	STRC
m1	ENSG00000257949	TEN1
m1	ENSG00000224066	RP4-622L5.7
m1	ENSG00000102900	NUP93
m1	ENSG00000155052	CNTNAP5
m1	ENSG00000256586	AC091171.1
m1	ENSG00000159352	PSMD4
m10	ENSG00000153015	CWC27
m10	ENSG00000164114	MAP9
m10	ENSG00000162290	DCP1A
m10	ENSG00000135698	MPHOSPH6
m10	ENSG00000250461	RP11-631M6.2
m10	ENSG00000183148	ANKRD20A2
m10	ENSG00000122779	TRIM24
m10	ENSG00000058272	PPP1R12A
m10	ENSG00000196774	ANKRD20A1
m10	ENSG00000255813	AL162497.1
m10	ENSG00000237522	NONOP2
m10	ENSG00000215447	BX322557.10
m10	ENSG00000139597	N4BP2L1
m10	ENSG00000119326	CTNNAL1
m10	ENSG00000124177	CHD6
m10	ENSG00000265315	Metazoa_SRP
m10	ENSG00000134899	ERCC5
m10	ENSG00000070814	TCOF1
m10	ENSG00000089048	ESF1
m10	ENSG00000104218	CSPP1
m10	ENSG00000153006	SREK1IP1
m10	ENSG00000138398	PPIG
m10	ENSG00000162614	NEXN
m10	ENSG00000234545	FAM133B
m10	ENSG00000153253	SCN3A
m10	ENSG00000111615	KRR1
m10	ENSG00000111845	PAK1IP1
m10	ENSG00000101361	NOP56
m10	ENSG00000188177	ZC3H6
m10	ENSG00000060339	CCAR1
m10	ENSG00000215559	ANKRD20A11P
m10	ENSG00000120688	WBP4
m10	ENSG00000229585	RPL21P44
m10	ENSG00000243806	CTC-484P3.1
m10	ENSG00000257572	RP11-478B9.2
m10	ENSG00000176728	TTTY14
m10	ENSG00000155282	RP11-195B21.3
m10	ENSG00000139168	ZCRB1
m10	ENSG00000101773	RBBP8
m10	ENSG00000015153	YAF2
m10	ENSG00000130921	C12orf65
m10	ENSG00000164609	SLU7
m10	ENSG00000169519	METTL15
m10	ENSG00000008988	RPS20
m10	ENSG00000117477	C1orf114
m10	ENSG00000262265	RP5-867C24.4
m10	ENSG00000113810	SMC4
m10	ENSG00000156603	MED19
m10	ENSG00000248092	RP11-159F24.1
m10	ENSG00000125676	THOC2
m10	ENSG00000243695	RP11-290L7.3
m10	ENSG00000267152	CTD-2528L19.6
m10	ENSG00000111832	RWDD1
m10	ENSG00000235859	AC006978.6
m10	ENSG00000104408	EIF3E
m10	ENSG00000124383	MPHOSPH10
m10	ENSG00000128829	EIF2AK4
m10	ENSG00000152404	CWF19L2
m10	ENSG00000176222	ZNF404
m10	ENSG00000008952	SEC62
m10	ENSG00000134597	RBMX2
m10	ENSG00000187240	DYNC2H1
m10	ENSG00000153250	RBMS1
m10	ENSG00000125870	SNRPB2
m10	ENSG00000164187	LMBRD2
m10	ENSG00000256500	RP11-73M18.2
m10	ENSG00000105821	DNAJC2
m10	ENSG00000088205	DDX18
m10	ENSG00000133640	LRRIQ1
m10	ENSG00000059769	DNAJC25
m10	ENSG00000215154	AC141586.5
m10	ENSG00000230453	ANKRD18B
m10	ENSG00000139579	NABP2
m10	ENSG00000108296	CWC25
m10	ENSG00000117877	CD3EAP
m10	ENSG00000226179	PPP2R3B-AS1
m10	ENSG00000090470	PDCD7
m10	ENSG00000101745	ANKRD12
m10	ENSG00000125482	TTF1
m10	ENSG00000174498	IGDCC3
m10	ENSG00000005810	MYCBP2
m10	ENSG00000254469	RP11-849H4.2
m10	ENSG00000041357	PSMA4
m10	ENSG00000073614	KDM5A
m10	ENSG00000203260	AL356475.1
m10	ENSG00000109475	RPL34
m10	ENSG00000187257	RSBN1L
m10	ENSG00000105849	TWISTNB
m10	ENSG00000127720	METTL25
m10	ENSG00000164022	AIMP1
m10	ENSG00000143207	RFWD2
m10	ENSG00000165525	NEMF
m10	ENSG00000025293	PHF20
m10	ENSG00000055044	NOP58
m10	ENSG00000158417	EIF5B
m10	ENSG00000070081	NUCB2
m10	ENSG00000259460	RP11-128A17.1
m10	ENSG00000106346	USP42
m10	ENSG00000183055	FAM133CP
m10	ENSG00000119720	C14orf102
m10	ENSG00000175611	LINC00476
m10	ENSG00000168259	DNAJC7
m10	ENSG00000083093	PALB2
m10	ENSG00000154479	CCDC173
m10	ENSG00000125351	UPF3B
m10	ENSG00000174444	RPL4
m10	ENSG00000109536	FRG1
m10	ENSG00000082269	FAM135A
m10	ENSG00000174720	LARP7
m10	ENSG00000255836	RP11-157G21.2
m10	ENSG00000247572	CTC-281B15.1
m10	ENSG00000232300	FAM215B
m10	ENSG00000110318	KIAA1377
m10	ENSG00000131732	ZCCHC9
m10	ENSG00000132466	ANKRD17
m10	ENSG00000168772	CXXC4
m10	ENSG00000173875	ZNF791
m10	ENSG00000146247	PHIP
m10	ENSG00000164221	CCDC112
m10	ENSG00000118420	UBE3D
m10	ENSG00000196199	MPHOSPH8
m10	ENSG00000172014	ANKRD20A4
m10	ENSG00000147419	CCDC25
m10	ENSG00000265411	Metazoa_SRP
m10	ENSG00000235613	NSRP1P1
m10	ENSG00000179083	FAM133A
m10	ENSG00000230202	RP11-632C17__A.1
m10	ENSG00000143322	ABL2
m10	ENSG00000182463	TSHZ2
m10	ENSG00000139915	MDGA2
m10	ENSG00000101882	NKAP
m10	ENSG00000141027	NCOR1
m10	ENSG00000017797	RALBP1
m10	ENSG00000236816	ANKRD20A7P
m10	ENSG00000132321	IQCA1
m10	ENSG00000232422	RP11-380M3.1
m10	ENSG00000186409	CCDC30
m10	ENSG00000100281	HMGXB4
m106	ENSG00000117360	PRPF3
m106	ENSG00000175309	AGXT2L2
m106	ENSG00000121068	TBX2
m106	ENSG00000119471	HSDL2
m106	ENSG00000112200	ZNF451
m106	ENSG00000119906	FAM178A
m106	ENSG00000132846	ZBED3
m106	ENSG00000135912	TTLL4
m106	ENSG00000075131	TIPIN
m106	ENSG00000165475	CRYL1
m106	ENSG00000157184	CPT2
m106	ENSG00000221923	ZNF880
m106	ENSG00000235453	TOPORS-AS1
m106	ENSG00000169189	NSMCE1
m106	ENSG00000165819	METTL3
m106	ENSG00000108187	PBLD
m106	ENSG00000111879	FAM184A
m106	ENSG00000134698	EIF2C4
m106	ENSG00000205795	CYS1
m106	ENSG00000134184	GSTM1
m106	ENSG00000129351	ILF3
m106	ENSG00000148057	IDNK
m106	ENSG00000158234	FAIM
m106	ENSG00000214290	C11orf93
m106	ENSG00000188811	NHLRC3
m106	ENSG00000197430	OPALIN
m106	ENSG00000100100	PIK3IP1
m106	ENSG00000204356	RDBP
m106	ENSG00000174807	CD248
m106	ENSG00000231064	RP11-263K19.4
m106	ENSG00000120697	ALG5
m106	ENSG00000197448	GSTK1
m106	ENSG00000185189	NRBP2
m106	ENSG00000159713	TPPP3
m106	ENSG00000112701	SENP6
m106	ENSG00000110721	CHKA
m106	ENSG00000186814	ZSCAN30
m106	ENSG00000087884	C11orf67
m106	ENSG00000090013	BLVRB
m106	ENSG00000196967	ZNF585A
m106	ENSG00000149292	TTC12
m106	ENSG00000243302	RP11-274B21.2
m106	ENSG00000246731	CTD-2514K5.2
m106	ENSG00000178700	DHFRL1
m106	ENSG00000169291	SHE
m106	ENSG00000135469	COQ10A
m106	ENSG00000205084	TMEM231
m106	ENSG00000166262	FAM227B
m106	ENSG00000125124	BBS2
m106	ENSG00000037474	NSUN2
m106	ENSG00000146729	GBAS
m106	ENSG00000124257	NEURL2
m106	ENSG00000163517	HDAC11
m106	ENSG00000132570	PCBD2
m106	ENSG00000198838	RYR3
m106	ENSG00000182054	IDH2
m106	ENSG00000137965	IFI44
m106	ENSG00000205581	HMGN1
m106	ENSG00000139218	SCAF11
m106	ENSG00000063322	MED29
m106	ENSG00000135148	TRAFD1
m106	ENSG00000107164	FUBP3
m106	ENSG00000172005	MAL
m106	ENSG00000140463	BBS4
m106	ENSG00000187239	FNBP1
m106	ENSG00000118997	DNAH7
m106	ENSG00000046647	GEMIN8
m106	ENSG00000198692	EIF1AY
m106	ENSG00000087077	TRIP6
m106	ENSG00000214688	C10orf105
m106	ENSG00000183549	ACSM5
m106	ENSG00000143797	MBOAT2
m106	ENSG00000106479	ZNF862
m106	ENSG00000148737	TCF7L2
m106	ENSG00000119917	IFIT3
m106	ENSG00000162384	C1orf123
m106	ENSG00000140450	ARRDC4
m106	ENSG00000170293	CMTM8
m106	ENSG00000004776	HSPB6
m106	ENSG00000012171	SEMA3B
m106	ENSG00000115760	BIRC6
m106	ENSG00000134824	FADS2
m106	ENSG00000254652	RP11-678P16.1
m106	ENSG00000178814	OPLAH
m106	ENSG00000143353	LYPLAL1
m106	ENSG00000143633	C1orf131
m106	ENSG00000012817	KDM5D
m106	ENSG00000188338	SLC38A3
m106	ENSG00000188536	HBA2
m106	ENSG00000072310	SREBF1
m106	ENSG00000101335	MYL9
m106	ENSG00000204228	HSD17B8
m106	ENSG00000170412	GPRC5C
m106	ENSG00000170892	TSEN34
m106	ENSG00000259065	RP5-1021I20.1
m106	ENSG00000048471	SNX29
m106	ENSG00000254245	PCDHGA3
m106	ENSG00000181625	SLX1B
m106	ENSG00000184785	CXorf69
m106	ENSG00000253982	CTD-2336O2.1
m106	ENSG00000093072	CECR1
m106	ENSG00000198892	SHISA4
m106	ENSG00000168916	ZNF608
m106	ENSG00000244879	GABPB1-AS1
m106	ENSG00000182179	UBA7
m106	ENSG00000168002	POLR2G
m106	ENSG00000010379	SLC6A13
m106	ENSG00000182307	C8orf33
m106	ENSG00000243452	NBPF15
m106	ENSG00000162836	ACP6
m106	ENSG00000010319	SEMA3G
m106	ENSG00000157349	DDX19B
m106	ENSG00000125434	SLC25A35
m106	ENSG00000154310	TNIK
m106	ENSG00000109107	ALDOC
m106	ENSG00000071282	LMCD1
m106	ENSG00000110066	SUV420H1
m106	ENSG00000085982	USP40
m106	ENSG00000186275	NBPF12
m106	ENSG00000163728	TTC14
m106	ENSG00000172456	FGGY
m106	ENSG00000211584	SLC48A1
m106	ENSG00000257337	RP11-983P16.4
m106	ENSG00000102805	CLN5
m106	ENSG00000132541	HRSP12
m106	ENSG00000250903	RP1-80B9.2
m106	ENSG00000185684	EP400NL
m106	ENSG00000144028	SNRNP200
m106	ENSG00000259414	HERC2P7
m106	ENSG00000204387	C6orf48
m106	ENSG00000088035	ALG6
m106	ENSG00000179950	PUF60
m106	ENSG00000164124	TMEM144
m106	ENSG00000113296	THBS4
m106	ENSG00000245526	LINC00461
m106	ENSG00000152464	RPP38
m106	ENSG00000164066	INTU
m106	ENSG00000185043	CIB1
m106	ENSG00000259038	CTD-2325P2.4
m106	ENSG00000140905	GCSH
m106	ENSG00000253816	RP11-1415C14.3
m106	ENSG00000113971	NPHP3
m106	ENSG00000048342	CC2D2A
m106	ENSG00000166704	ZNF606
m106	ENSG00000148444	COMMD3
m106	ENSG00000132031	MATN3
m106	ENSG00000131844	MCCC2
m106	ENSG00000047230	CTPS2
m106	ENSG00000188153	COL4A5
m106	ENSG00000173947	C1orf88
m106	ENSG00000189171	S100A13
m106	ENSG00000107020	PLGRKT
m106	ENSG00000128928	IVD
m106	ENSG00000165282	PIGO
m106	ENSG00000105669	COPE
m106	ENSG00000104325	DECR1
m106	ENSG00000241935	HOGA1
m106	ENSG00000186994	KANK3
m106	ENSG00000133226	SRRM1
m106	ENSG00000049239	H6PD
m106	ENSG00000103248	MTHFSD
m106	ENSG00000149090	PAMR1
m106	ENSG00000257923	CUX1
m106	ENSG00000158296	SLC13A3
m106	ENSG00000136935	GOLGA1
m106	ENSG00000050405	LIMA1
m106	ENSG00000186866	POFUT2
m106	ENSG00000164627	KIF6
m106	ENSG00000170271	C5orf4
m106	ENSG00000214331	RP11-252A24.2
m106	ENSG00000158604	TMED4
m106	ENSG00000132199	ENOSF1
m106	ENSG00000156966	B3GNT7
m106	ENSG00000152520	PAN3
m106	ENSG00000214194	AC073346.2
m106	ENSG00000176971	FIBIN
m106	ENSG00000130177	CDC16
m106	ENSG00000166526	ZNF3
m106	ENSG00000164331	ANKRA2
m106	ENSG00000157911	PEX10
m106	ENSG00000008311	AASS
m106	ENSG00000174428	GTF2IRD2B
m106	ENSG00000175575	PAAF1
m106	ENSG00000146830	GIGYF1
m106	ENSG00000138085	ATRAID
m106	ENSG00000182165	TP53TG1
m106	ENSG00000147535	PPAPDC1B
m106	ENSG00000131477	RAMP2
m106	ENSG00000204136	GGTA1P
m106	ENSG00000100941	PNN
m106	ENSG00000100003	SEC14L2
m106	ENSG00000130988	RGN
m106	ENSG00000086205	FOLH1
m106	ENSG00000127884	ECHS1
m106	ENSG00000165092	ALDH1A1
m106	ENSG00000167995	BEST1
m106	ENSG00000137275	RIPK1
m106	ENSG00000249306	RP11-267A15.1
m106	ENSG00000109046	WSB1
m106	ENSG00000214046	C19orf42
m106	ENSG00000206172	HBA1
m106	ENSG00000122299	ZC3H7A
m106	ENSG00000117305	HMGCL
m106	ENSG00000143486	EIF2D
m106	ENSG00000110871	COQ5
m106	ENSG00000105607	GCDH
m106	ENSG00000151322	NPAS3
m106	ENSG00000120915	EPHX2
m106	ENSG00000151303	AGAP11
m106	ENSG00000230084	RP4-613B23.1
m106	ENSG00000175130	MARCKSL1
m106	ENSG00000174796	THAP6
m106	ENSG00000101346	POFUT1
m106	ENSG00000131730	CKMT2
m106	ENSG00000100243	CYB5R3
m106	ENSG00000140319	SRP14
m106	ENSG00000120675	DNAJC15
m106	ENSG00000145020	AMT
m106	ENSG00000148671	C10orf116
m106	ENSG00000149633	KIAA1755
m106	ENSG00000059145	UNKL
m106	ENSG00000156384	SFR1
m106	ENSG00000106003	LFNG
m106	ENSG00000108370	RGS9
m106	ENSG00000140043	PTGR2
m106	ENSG00000157916	RER1
m106	ENSG00000122971	ACADS
m106	ENSG00000182851	GPIHBP1
m106	ENSG00000188126	MYO15B
m106	ENSG00000105700	KXD1
m106	ENSG00000213625	LEPROT
m106	ENSG00000234171	AC108488.3
m106	ENSG00000116560	SFPQ
m106	ENSG00000163378	EOGT
m106	ENSG00000056558	TRAF1
m106	ENSG00000137070	IL11RA
m106	ENSG00000083123	BCKDHB
m106	ENSG00000165494	PCF11
m106	ENSG00000134201	GSTM5
m106	ENSG00000157593	SLC35B2
m106	ENSG00000183604	RP11-347C12.2
m106	ENSG00000041880	PARP3
m106	ENSG00000099256	PRTFDC1
m106	ENSG00000139370	SLC15A4
m106	ENSG00000152240	HAUS1
m106	ENSG00000227946	AC007383.3
m106	ENSG00000176700	SCAND2
m106	ENSG00000204435	CSNK2B
m106	ENSG00000117859	OSBPL9
m106	ENSG00000138286	FAM149B1
m106	ENSG00000114473	IQCG
m106	ENSG00000197857	ZNF44
m106	ENSG00000159348	CYB5R1
m106	ENSG00000185989	RASA3
m106	ENSG00000161671	EMC10
m106	ENSG00000088448	ANKRD10
m106	ENSG00000221978	CCNL2
m106	ENSG00000238035	AC138035.2
m106	ENSG00000110911	SLC11A2
m106	ENSG00000100650	SRSF5
m106	ENSG00000182919	C11orf54
m106	ENSG00000170542	SERPINB9
m106	ENSG00000138613	APH1B
m106	ENSG00000137145	DENND4C
m106	ENSG00000014123	UFL1
m106	ENSG00000237310	GS1-124K5.4
m106	ENSG00000138074	SLC5A6
m106	ENSG00000136068	FLNB
m106	ENSG00000149231	CCDC82
m106	ENSG00000110801	PSMD9
m106	ENSG00000001036	FUCA2
m106	ENSG00000160307	S100B
m106	ENSG00000262576	PCDHGA4
m106	ENSG00000054179	ENTPD2
m106	ENSG00000140939	NOL3
m106	ENSG00000144451	SPAG16
m106	ENSG00000100994	PYGB
m106	ENSG00000185475	TMEM179B
m106	ENSG00000204520	MICA
m106	ENSG00000204410	MSH5
m106	ENSG00000189403	HMGB1
m106	ENSG00000129353	SLC44A2
m106	ENSG00000239779	WBP1
m106	ENSG00000031691	CENPQ
m106	ENSG00000026950	BTN3A1
m106	ENSG00000237094	RP4-669L17.10
m106	ENSG00000164104	HMGB2
m106	ENSG00000162976	PQLC3
m106	ENSG00000074755	ZZEF1
m106	ENSG00000108387	SEPT4
m106	ENSG00000260267	RP11-452L6.5
m106	ENSG00000140025	EFCAB11
m106	ENSG00000131788	PIAS3
m106	ENSG00000156162	DPY19L4
m106	ENSG00000266904	LINC00663
m106	ENSG00000114670	NEK11
m106	ENSG00000110492	MDK
m106	ENSG00000169398	PTK2
m106	ENSG00000204977	TRIM13
m106	ENSG00000011143	MKS1
m106	ENSG00000141736	ERBB2
m106	ENSG00000157181	C1orf27
m106	ENSG00000135744	AGT
m106	ENSG00000101639	CEP192
m106	ENSG00000145476	CYP4V2
m106	ENSG00000234177	AC068057.2
m106	ENSG00000123453	SARDH
m106	ENSG00000129219	PLD2
m106	ENSG00000153446	C16orf89
m106	ENSG00000215386	LINC00478
m106	ENSG00000256043	CTSO
m106	ENSG00000145721	LIX1
m106	ENSG00000105379	ETFB
m106	ENSG00000100033	PRODH
m106	ENSG00000159792	PSKH1
m106	ENSG00000137959	IFI44L
m106	ENSG00000039319	ZFYVE16
m106	ENSG00000105357	MYH14
m106	ENSG00000203876	RP11-451M19.3
m106	ENSG00000177576	C18orf32
m106	ENSG00000126773	PCNXL4
m106	ENSG00000078808	SDF4
m106	ENSG00000092036	HAUS4
m106	ENSG00000204802	RP11-111F5.4
m106	ENSG00000137992	DBT
m106	ENSG00000223501	VPS52
m106	ENSG00000171903	CYP4F11
m106	ENSG00000143995	MEIS1
m106	ENSG00000253764	RP11-439C15.4
m106	ENSG00000099260	PALMD
m106	ENSG00000206190	ATP10A
m106	ENSG00000172992	DCAKD
m106	ENSG00000021776	AQR
m106	ENSG00000163945	UVSSA
m106	ENSG00000188931	C1orf192
m106	ENSG00000074356	C17orf85
m106	ENSG00000147509	RGS20
m106	ENSG00000074319	TSG101
m106	ENSG00000070759	TESK2
m106	ENSG00000163785	RYK
m106	ENSG00000176834	VSIG10
m106	ENSG00000146674	IGFBP3
m106	ENSG00000116157	GPX7
m106	ENSG00000107551	RASSF4
m106	ENSG00000225119	RP11-291L22.3
m106	ENSG00000188629	ZNF177
m106	ENSG00000139631	CSAD
m106	ENSG00000132530	XAF1
m106	ENSG00000177082	WDR73
m106	ENSG00000160781	PAQR6
m106	ENSG00000166532	RIMKLB
m106	ENSG00000163344	PMVK
m106	ENSG00000100889	PCK2
m106	ENSG00000088854	C20orf194
m106	ENSG00000009413	REV3L
m106	ENSG00000154767	XPC
m106	ENSG00000177156	TALDO1
m106	ENSG00000122678	POLM
m106	ENSG00000111581	NUP107
m106	ENSG00000100225	FBXO7
m106	ENSG00000184154	LRTOMT
m106	ENSG00000152042	NBPF11
m106	ENSG00000047410	TPR
m106	ENSG00000138614	C15orf44
m106	ENSG00000114982	KANSL3
m106	ENSG00000197818	SLC9A8
m106	ENSG00000146842	TMEM209
m106	ENSG00000151665	PIGF
m106	ENSG00000181038	METTL23
m106	ENSG00000052841	TTC17
m106	ENSG00000185344	ATP6V0A2
m106	ENSG00000159761	C16orf86
m106	ENSG00000113194	FAF2
m106	ENSG00000129933	MAU2
m106	ENSG00000131778	CHD1L
m106	ENSG00000030066	NUP160
m106	ENSG00000176623	FAM82B
m106	ENSG00000087076	HSD17B14
m106	ENSG00000100105	PATZ1
m106	ENSG00000169239	CA5B
m106	ENSG00000147576	ADHFE1
m106	ENSG00000266714	MYO15B
m106	ENSG00000110536	PTPMT1
m106	ENSG00000239235	AC008280.5
m106	ENSG00000137285	TUBB2B
m106	ENSG00000184313	HEATR8
m106	ENSG00000075239	ACAT1
m106	ENSG00000243716	RP11-368J21.2
m106	ENSG00000160808	MYL3
m106	ENSG00000164309	CMYA5
m106	ENSG00000213240	NOTCH2NL
m106	ENSG00000123096	SSPN
m106	ENSG00000187773	FAM69C
m106	ENSG00000181192	DHTKD1
m106	ENSG00000164776	PHKG1
m106	ENSG00000076604	TRAF4
m106	ENSG00000042445	RETSAT
m106	ENSG00000117899	MESDC2
m106	ENSG00000206149	HERC2P9
m106	ENSG00000134202	GSTM3
m106	ENSG00000004864	SLC25A13
m106	ENSG00000129824	RPS4Y1
m106	ENSG00000108587	GOSR1
m106	ENSG00000125457	MIF4GD
m106	ENSG00000253716	RP13-582O9.5
m106	ENSG00000115042	FAHD2A
m106	ENSG00000083457	ITGAE
m106	ENSG00000171503	ETFDH
m106	ENSG00000171530	TBCA
m106	ENSG00000104812	GYS1
m106	ENSG00000055211	GINM1
m106	ENSG00000125968	ID1
m106	ENSG00000196663	TECPR2
m106	ENSG00000182944	EWSR1
m106	ENSG00000019144	PHLDB1
m106	ENSG00000121940	CLCC1
m106	ENSG00000164530	PI16
m106	ENSG00000141642	ELAC1
m106	ENSG00000245556	CTD-2037K23.2
m106	ENSG00000119632	IFI27L2
m106	ENSG00000101751	POLI
m106	ENSG00000149591	TAGLN
m106	ENSG00000104133	SPG11
m106	ENSG00000140522	RLBP1
m106	ENSG00000109920	FNBP4
m106	ENSG00000112977	DAP
m106	ENSG00000115128	AC008073.5
m106	ENSG00000139192	TAPBPL
m106	ENSG00000134548	C12orf39
m106	ENSG00000117620	SLC35A3
m106	ENSG00000137337	MDC1
m106	ENSG00000248098	BCKDHA
m106	ENSG00000101198	NKAIN4
m106	ENSG00000197429	IPP
m106	ENSG00000169006	NTSR2
m106	ENSG00000132478	UNK
m106	ENSG00000143401	ANP32E
m106	ENSG00000044446	PHKA2
m106	ENSG00000167766	ZNF83
m106	ENSG00000149485	FADS1
m106	ENSG00000245573	BDNF-AS
m106	ENSG00000177853	ZNF518A
m106	ENSG00000143578	CREB3L4
m106	ENSG00000038002	AGA
m106	ENSG00000109113	RAB34
m106	ENSG00000169203	RP11-231C14.4
m106	ENSG00000099940	SNAP29
m106	ENSG00000025796	SEC63
m106	ENSG00000081791	KIAA0141
m106	ENSG00000161533	ACOX1
m106	ENSG00000253352	TUG1
m106	ENSG00000213390	ARHGAP19
m106	ENSG00000197375	SLC22A5
m106	ENSG00000143437	ARNT
m106	ENSG00000144455	SUMF1
m106	ENSG00000143811	PYCR2
m106	ENSG00000174628	IQCK
m106	ENSG00000117362	APH1A
m106	ENSG00000254221	PCDHGB1
m106	ENSG00000154133	ROBO4
m106	ENSG00000078401	EDN1
m106	ENSG00000114115	RBP1
m106	ENSG00000109099	PMP22
m106	ENSG00000185339	TCN2
m106	ENSG00000196975	ANXA4
m106	ENSG00000129270	MMP28
m106	ENSG00000114316	USP4
m106	ENSG00000125462	C1orf61
m106	ENSG00000101439	CST3
m106	ENSG00000131002	TXLNG2P
m106	ENSG00000159131	GART
m106	ENSG00000107317	PTGDS
m106	ENSG00000166816	LDHD
m106	ENSG00000075188	NUP37
m106	ENSG00000184381	PLA2G6
m106	ENSG00000144713	RPL32
m106	ENSG00000100842	EFS
m106	ENSG00000175220	ARHGAP1
m106	ENSG00000109610	SOD3
m106	ENSG00000132406	TMEM128
m106	ENSG00000070526	ST6GALNAC1
m106	ENSG00000075856	SART3
m106	ENSG00000253948	RP11-410L14.2
m106	ENSG00000160584	SIK3
m106	ENSG00000223745	RP4-717I23.3
m106	ENSG00000198270	TMEM116
m106	ENSG00000196214	ZNF766
m106	ENSG00000133313	CNDP2
m106	ENSG00000135094	SDS
m107	ENSG00000060642	PIGV
m107	ENSG00000083857	FAT1
m107	ENSG00000143183	TMCO1
m107	ENSG00000054983	GALC
m107	ENSG00000153208	MERTK
m107	ENSG00000078295	ADCY2
m107	ENSG00000145824	CXCL14
m107	ENSG00000165730	STOX1
m107	ENSG00000156076	WIF1
m107	ENSG00000134250	NOTCH2
m107	ENSG00000243317	C7orf73
m107	ENSG00000025423	HSD17B6
m107	ENSG00000119938	PPP1R3C
m107	ENSG00000141380	SS18
m107	ENSG00000196757	ZNF700
m107	ENSG00000101888	NXT2
m107	ENSG00000186132	C2orf76
m107	ENSG00000140391	TSPAN3
m107	ENSG00000132669	RIN2
m107	ENSG00000137033	IL33
m107	ENSG00000183283	DAZAP2
m107	ENSG00000111875	ASF1A
m107	ENSG00000169439	SDC2
m107	ENSG00000001084	GCLC
m107	ENSG00000123384	LRP1
m107	ENSG00000198721	ECI2
m107	ENSG00000135506	OS9
m107	ENSG00000114698	PLSCR4
m107	ENSG00000115548	KDM3A
m107	ENSG00000152990	GPR125
m107	ENSG00000153944	MSI2
m107	ENSG00000119737	GPR75
m107	ENSG00000141232	TOB1
m107	ENSG00000018625	ATP1A2
m107	ENSG00000116641	DOCK7
m107	ENSG00000120333	MRPS14
m107	ENSG00000078549	ADCYAP1R1
m107	ENSG00000188725	C5orf43
m107	ENSG00000122729	ACO1
m107	ENSG00000188938	FAM120AOS
m107	ENSG00000145431	PDGFC
m107	ENSG00000089472	HEPH
m107	ENSG00000152268	SPON1
m107	ENSG00000166340	TPP1
m107	ENSG00000196781	TLE1
m107	ENSG00000008441	NFIX
m107	ENSG00000164292	RHOBTB3
m107	ENSG00000163110	PDLIM5
m107	ENSG00000155897	ADCY8
m107	ENSG00000079931	MOXD1
m107	ENSG00000165898	ISCA2
m107	ENSG00000150907	FOXO1
m107	ENSG00000067560	RHOA
m107	ENSG00000101849	TBL1X
m107	ENSG00000150551	LYPD1
m107	ENSG00000165810	BTNL9
m107	ENSG00000142188	TMEM50B
m107	ENSG00000147119	CHST7
m107	ENSG00000073712	FERMT2
m107	ENSG00000173041	ZNF680
m107	ENSG00000121957	GPSM2
m107	ENSG00000109472	CPE
m107	ENSG00000134533	RERG
m107	ENSG00000071967	CYBRD1
m107	ENSG00000095321	CRAT
m107	ENSG00000226479	TMEM185B
m107	ENSG00000068697	LAPTM4A
m107	ENSG00000196338	NLGN3
m107	ENSG00000155016	CYP2U1
m107	ENSG00000188647	PTAR1
m107	ENSG00000171766	GATM
m107	ENSG00000101144	BMP7
m107	ENSG00000114646	CSPG5
m107	ENSG00000168710	AHCYL1
m107	ENSG00000100532	CGRRF1
m107	ENSG00000143553	SNAPIN
m107	ENSG00000236819	AC087393.1
m107	ENSG00000134748	PRPF38A
m107	ENSG00000053371	AKR7A2
m107	ENSG00000146005	PSD2
m107	ENSG00000168917	SLC35G2
m107	ENSG00000168385	SEPT2
m107	ENSG00000049246	PER3
m107	ENSG00000113645	WWC1
m107	ENSG00000143149	ALDH9A1
m107	ENSG00000075142	SRI
m107	ENSG00000196263	ZNF471
m107	ENSG00000135821	GLUL
m107	ENSG00000204580	DDR1
m107	ENSG00000170989	S1PR1
m107	ENSG00000155827	RNF20
m107	ENSG00000140937	CDH11
m107	ENSG00000110315	RNF141
m107	ENSG00000138796	HADH
m107	ENSG00000241399	CD302
m107	ENSG00000107290	SETX
m107	ENSG00000076351	SLC46A1
m107	ENSG00000148218	ALAD
m107	ENSG00000114738	MAPKAPK3
m107	ENSG00000164125	FAM198B
m107	ENSG00000088888	MAVS
m107	ENSG00000154928	EPHB1
m107	ENSG00000099204	ABLIM1
m107	ENSG00000148730	EIF4EBP2
m107	ENSG00000168646	AXIN2
m107	ENSG00000062598	ELMO2
m107	ENSG00000143742	SRP9
m107	ENSG00000162407	PPAP2B
m107	ENSG00000138756	BMP2K
m107	ENSG00000129244	ATP1B2
m107	ENSG00000138463	DIRC2
m107	ENSG00000111058	ACSS3
m107	ENSG00000099992	TBC1D10A
m107	ENSG00000122557	HERPUD2
m107	ENSG00000225472	RP11-120J1.1
m107	ENSG00000172340	SUCLG2
m107	ENSG00000136160	EDNRB
m107	ENSG00000152700	SAR1B
m107	ENSG00000134744	ZCCHC11
m107	ENSG00000130287	NCAN
m107	ENSG00000115109	EPB41L5
m107	ENSG00000109062	SLC9A3R1
m107	ENSG00000168461	RAB31
m107	ENSG00000153904	DDAH1
m107	ENSG00000205213	LGR4
m107	ENSG00000167315	ACAA2
m107	ENSG00000172380	GNG12
m107	ENSG00000240184	PCDHGC3
m107	ENSG00000136297	MMD2
m107	ENSG00000155324	GRAMD3
m107	ENSG00000255690	AC005013.1
m107	ENSG00000166292	TMEM100
m107	ENSG00000164188	RANBP3L
m107	ENSG00000151023	ENKUR
m107	ENSG00000143514	TP53BP2
m107	ENSG00000123104	ITPR2
m107	ENSG00000058866	DGKG
m107	ENSG00000135052	GOLM1
m107	ENSG00000154229	PRKCA
m107	ENSG00000148482	SLC39A12
m107	ENSG00000081818	PCDHB4
m107	ENSG00000155189	AGPAT5
m107	ENSG00000135919	SERPINE2
m107	ENSG00000136156	ITM2B
m107	ENSG00000148672	GLUD1
m107	ENSG00000114491	UMPS
m107	ENSG00000164244	PRRC1
m107	ENSG00000179604	CDC42EP4
m107	ENSG00000084754	HADHA
m107	ENSG00000139644	TMBIM6
m107	ENSG00000166801	FAM111A
m107	ENSG00000118855	MFSD1
m107	ENSG00000101542	CDH20
m107	ENSG00000138448	ITGAV
m107	ENSG00000181264	TMEM136
m107	ENSG00000071575	TRIB2
m107	ENSG00000180263	FGD6
m107	ENSG00000136044	APPL2
m107	ENSG00000197894	ADH5
m107	ENSG00000124615	MOCS1
m107	ENSG00000126016	AMOT
m107	ENSG00000149532	CPSF7
m107	ENSG00000081377	CDC14B
m107	ENSG00000189221	MAOA
m107	ENSG00000204599	TRIM39
m107	ENSG00000154217	PITPNC1
m107	ENSG00000197442	MAP3K5
m107	ENSG00000135424	ITGA7
m107	ENSG00000166821	PEX11A
m107	ENSG00000131941	RHPN2
m107	ENSG00000130818	ZNF426
m107	ENSG00000127241	MASP1
m107	ENSG00000154319	FAM167A
m107	ENSG00000127249	ATP13A4
m107	ENSG00000262304	RP11-235E17.2
m107	ENSG00000147475	ERLIN2
m107	ENSG00000106049	HIBADH
m107	ENSG00000134138	MEIS2
m107	ENSG00000104412	EMC2
m107	ENSG00000160209	PDXK
m107	ENSG00000197558	SSPO
m107	ENSG00000161217	PCYT1A
m107	ENSG00000070614	NDST1
m107	ENSG00000067141	NEO1
m107	ENSG00000150540	HNMT
m107	ENSG00000100330	MTMR3
m107	ENSG00000131899	LLGL1
m107	ENSG00000170915	PAQR8
m107	ENSG00000115380	EFEMP1
m107	ENSG00000171100	MTM1
m107	ENSG00000103061	SLC7A6OS
m107	ENSG00000134853	PDGFRA
m107	ENSG00000103740	ACSBG1
m107	ENSG00000239305	RNF103
m107	ENSG00000158467	AHCYL2
m107	ENSG00000242498	C15orf38
m107	ENSG00000103811	CTSH
m107	ENSG00000100299	ARSA
m107	ENSG00000153140	CETN3
m107	ENSG00000031081	ARHGAP31
m107	ENSG00000171444	MCC
m107	ENSG00000182551	ADI1
m107	ENSG00000175348	TMEM9B
m107	ENSG00000185565	LSAMP
m107	ENSG00000178904	DPY19L3
m107	ENSG00000123836	PFKFB2
m107	ENSG00000065534	MYLK
m107	ENSG00000196660	SLC30A10
m107	ENSG00000164434	FABP7
m107	ENSG00000159228	CBR1
m107	ENSG00000152620	NADKD1
m107	ENSG00000162512	SDC3
m107	ENSG00000068976	PYGM
m107	ENSG00000085719	CPNE3
m107	ENSG00000141179	PCTP
m107	ENSG00000123472	ATPAF1
m107	ENSG00000128050	PAICS
m107	ENSG00000166734	CASC4
m107	ENSG00000147027	TMEM47
m107	ENSG00000089006	SNX5
m107	ENSG00000170581	STAT2
m107	ENSG00000103742	IGDCC4
m107	ENSG00000122497	NBPF14
m107	ENSG00000046889	PREX2
m107	ENSG00000077942	FBLN1
m107	ENSG00000124067	SLC12A4
m107	ENSG00000186591	UBE2H
m107	ENSG00000119638	NEK9
m107	ENSG00000153885	KCTD15
m107	ENSG00000105894	PTN
m107	ENSG00000163406	SLC15A2
m107	ENSG00000076716	GPC4
m107	ENSG00000115239	ASB3
m107	ENSG00000090863	GLG1
m107	ENSG00000144749	LRIG1
m107	ENSG00000141551	CSNK1D
m107	ENSG00000187735	TCEA1
m107	ENSG00000173334	TRIB1
m107	ENSG00000100234	TIMP3
m107	ENSG00000070476	ZXDC
m107	ENSG00000119711	ALDH6A1
m107	ENSG00000162437	RAVER2
m107	ENSG00000072274	TFRC
m107	ENSG00000129657	SEC14L1
m107	ENSG00000077585	GPR137B
m107	ENSG00000124479	NDP
m107	ENSG00000167601	AXL
m107	ENSG00000076685	NT5C2
m107	ENSG00000171791	BCL2
m107	ENSG00000198189	HSD17B11
m107	ENSG00000214013	GANC
m107	ENSG00000134152	C15orf29
m107	ENSG00000093183	SEC22C
m107	ENSG00000115318	LOXL3
m107	ENSG00000144468	RHBDD1
m107	ENSG00000205336	GPR56
m107	ENSG00000117528	ABCD3
m107	ENSG00000173402	DAG1
m107	ENSG00000166833	NAV2
m107	ENSG00000176894	PXMP2
m107	ENSG00000139323	POC1B
m107	ENSG00000148053	NTRK2
m107	ENSG00000109911	ELP4
m107	ENSG00000135144	DTX1
m107	ENSG00000102935	ZNF423
m107	ENSG00000176244	ACBD7
m107	ENSG00000154553	PDLIM3
m107	ENSG00000171885	AQP4
m107	ENSG00000003756	RBM5
m107	ENSG00000144476	CXCR7
m107	ENSG00000203667	COX20
m107	ENSG00000063587	ZNF275
m107	ENSG00000196208	GREB1
m107	ENSG00000151012	SLC7A11
m107	ENSG00000170949	ZNF160
m107	ENSG00000159658	KIAA0494
m107	ENSG00000166225	FRS2
m107	ENSG00000103479	RBL2
m107	ENSG00000105953	OGDH
m107	ENSG00000105854	PON2
m107	ENSG00000080493	SLC4A4
m107	ENSG00000157150	TIMP4
m107	ENSG00000135916	ITM2C
m107	ENSG00000188613	NANOS1
m107	ENSG00000164106	SCRG1
m107	ENSG00000150433	TMEM218
m107	ENSG00000138303	ASCC1
m107	ENSG00000134873	CLDN10
m107	ENSG00000260261	RP11-480A16.1
m107	ENSG00000140545	MFGE8
m107	ENSG00000187123	LYPD6
m107	ENSG00000136869	TLR4
m107	ENSG00000229847	EMX2OS
m107	ENSG00000188554	NBR1
m107	ENSG00000184985	SORCS2
m107	ENSG00000112333	NR2E1
m107	ENSG00000164904	ALDH7A1
m107	ENSG00000170390	DCLK2
m107	ENSG00000185238	PRMT3
m107	ENSG00000145284	SCD5
m107	ENSG00000115159	GPD2
m107	ENSG00000138029	HADHB
m107	ENSG00000114166	KAT2B
m107	ENSG00000135540	NHSL1
m107	ENSG00000187068	C3orf70
m107	ENSG00000147853	AK3
m107	ENSG00000047634	SCML1
m107	ENSG00000078114	NEBL
m107	ENSG00000197702	PARVA
m107	ENSG00000113594	LIFR
m107	ENSG00000144730	IL17RD
m107	ENSG00000115902	SLC1A4
m107	ENSG00000174945	AMZ1
m107	ENSG00000111275	ALDH2
m107	ENSG00000144847	IGSF11
m107	ENSG00000089050	RBBP9
m107	ENSG00000106278	PTPRZ1
m107	ENSG00000183579	ZNRF3
m107	ENSG00000158321	AUTS2
m107	ENSG00000067177	PHKA1
m107	ENSG00000120733	KDM3B
m107	ENSG00000250317	C4orf52
m107	ENSG00000124942	AHNAK
m107	ENSG00000116016	EPAS1
m107	ENSG00000079215	SLC1A3
m107	ENSG00000122008	POLK
m107	ENSG00000100711	ZFYVE21
m107	ENSG00000113209	PCDHB5
m107	ENSG00000179399	GPC5
m107	ENSG00000165118	C9orf64
m107	ENSG00000165821	SALL2
m107	ENSG00000117791	MARC2
m107	ENSG00000139155	SLCO1C1
m107	ENSG00000147408	CSGALNACT1
m107	ENSG00000134970	TMED7
m107	ENSG00000122642	FKBP9
m107	ENSG00000101191	DIDO1
m107	ENSG00000169375	SIN3A
m107	ENSG00000170653	ATF7
m107	ENSG00000168216	LMBRD1
m107	ENSG00000103549	RNF40
m107	ENSG00000133812	SBF2
m107	ENSG00000088451	TGDS
m107	ENSG00000188342	GTF2F2
m107	ENSG00000101850	GPR143
m107	ENSG00000164117	FBXO8
m107	ENSG00000105088	OLFM2
m107	ENSG00000170743	SYT9
m107	ENSG00000178996	SNX18
m107	ENSG00000180537	RNF182
m107	ENSG00000144649	FAM198A
m107	ENSG00000196743	GM2A
m107	ENSG00000135318	NT5E
m107	ENSG00000138696	BMPR1B
m107	ENSG00000136840	ST6GALNAC4
m107	ENSG00000151892	GFRA1
m107	ENSG00000135069	PSAT1
m107	ENSG00000011405	PIK3C2A
m107	ENSG00000140374	ETFA
m107	ENSG00000197977	ELOVL2
m107	ENSG00000187079	TEAD1
m107	ENSG00000213516	RBMXL1
m107	ENSG00000163285	GABRG1
m107	ENSG00000198075	SULT1C4
m107	ENSG00000119616	FCF1
m107	ENSG00000145794	MEGF10
m107	ENSG00000169714	CNBP
m107	ENSG00000101871	MID1
m107	ENSG00000179761	PIPOX
m107	ENSG00000134352	IL6ST
m107	ENSG00000188064	WNT7B
m107	ENSG00000129521	EGLN3
m107	ENSG00000180747	SLC7A5P1
m107	ENSG00000156639	ZFAND3
m107	ENSG00000164976	KIAA1161
m107	ENSG00000168614	NBPF9
m107	ENSG00000116171	SCP2
m107	ENSG00000234851	RP11-3P17.3
m107	ENSG00000164751	PEX2
m107	ENSG00000185722	ANKFY1
m107	ENSG00000079739	PGM1
m107	ENSG00000089876	DHX32
m107	ENSG00000169604	ANTXR1
m107	ENSG00000149403	GRIK4
m107	ENSG00000133943	C14orf159
m107	ENSG00000148110	HIATL1
m107	ENSG00000047578	KIAA0556
m107	ENSG00000046653	GPM6B
m107	ENSG00000173905	GOLIM4
m107	ENSG00000125285	SOX21
m107	ENSG00000185985	SLITRK2
m107	ENSG00000182606	TRAK1
m107	ENSG00000152661	GJA1
m107	ENSG00000235655	H3F3AP4
m107	ENSG00000121691	CAT
m107	ENSG00000134042	MRO
m107	ENSG00000066027	PPP2R5A
m107	ENSG00000178761	FAM219B
m107	ENSG00000182985	CADM1
m107	ENSG00000132825	PPP1R3D
m107	ENSG00000146648	EGFR
m107	ENSG00000244734	HBB
m107	ENSG00000139531	SUOX
m107	ENSG00000116729	WLS
m107	ENSG00000114745	GORASP1
m107	ENSG00000110436	SLC1A2
m107	ENSG00000072121	ZFYVE26
m107	ENSG00000105767	CADM4
m107	ENSG00000171612	SLC25A33
m107	ENSG00000174080	CTSF
m107	ENSG00000090054	SPTLC1
m107	ENSG00000164039	BDH2
m107	ENSG00000148700	ADD3
m107	ENSG00000179134	SAMD4B
m107	ENSG00000144909	OSBPL11
m107	ENSG00000108231	LGI1
m108	ENSG00000105048	TNNT1
m108	ENSG00000238276	RP11-245J24.1
m108	ENSG00000178075	GRAMD1C
m108	ENSG00000167676	PLIN4
m108	ENSG00000081853	PCDHGA2
m108	ENSG00000186951	PPARA
m108	ENSG00000087495	PHACTR3
m108	ENSG00000055070	SZRD1
m108	ENSG00000259417	RP11-2E17.1
m108	ENSG00000120896	SORBS3
m108	ENSG00000141469	SLC14A1
m108	ENSG00000186350	RXRA
m108	ENSG00000111783	RFX4
m108	ENSG00000236790	LINC00299
m108	ENSG00000141756	FKBP10
m108	ENSG00000158006	PAFAH2
m108	ENSG00000172171	TEFM
m108	ENSG00000165449	SLC16A9
m108	ENSG00000122756	CNTFR
m108	ENSG00000168913	ENHO
m108	ENSG00000092621	PHGDH
m108	ENSG00000174306	ZHX3
m108	ENSG00000260800	RP11-294K24.4
m108	ENSG00000253846	PCDHGA10
m108	ENSG00000100427	MLC1
m108	ENSG00000181449	SOX2
m108	ENSG00000223802	CERS1
m108	ENSG00000241839	PLEKHO2
m108	ENSG00000104823	ECH1
m108	ENSG00000178764	ZHX2
m108	ENSG00000204128	C2orf72
m108	ENSG00000136802	LRRC8A
m108	ENSG00000254122	PCDHGB7
m108	ENSG00000213398	LCAT
m108	ENSG00000185033	SEMA4B
m108	ENSG00000187049	TMEM216
m108	ENSG00000161955	TNFSF13
m108	ENSG00000100280	AP1B1
m108	ENSG00000174606	ANGEL2
m108	ENSG00000043355	ZIC2
m108	ENSG00000144230	GPR17
m108	ENSG00000087903	RFX2
m108	ENSG00000152767	FARP1
m108	ENSG00000182095	TNRC18
m108	ENSG00000105221	AKT2
m108	ENSG00000185432	METTL7A
m108	ENSG00000240906	AP000356.1
m108	ENSG00000204219	TCEA3
m108	ENSG00000167977	KCTD5
m108	ENSG00000165795	NDRG2
m108	ENSG00000165478	HEPACAM
m108	ENSG00000166333	ILK
m108	ENSG00000253159	PCDHGA12
m108	ENSG00000257017	HP
m108	ENSG00000243069	ARHGEF26-AS1
m108	ENSG00000162520	SYNC
m108	ENSG00000099956	SMARCB1
m108	ENSG00000078246	TULP3
m108	ENSG00000109501	WFS1
m108	ENSG00000170075	GPR37L1
m108	ENSG00000126351	THRA
m108	ENSG00000154856	APCDD1
m108	ENSG00000106689	LHX2
m108	ENSG00000100106	TRIOBP
m108	ENSG00000166341	DCHS1
m108	ENSG00000183773	AIFM3
m108	ENSG00000214456	PLIN5
m108	ENSG00000185920	PTCH1
m108	ENSG00000159423	ALDH4A1
m108	ENSG00000137502	RAB30
m108	ENSG00000168306	ACOX2
m108	ENSG00000076555	ACACB
m108	ENSG00000148604	RGR
m108	ENSG00000172057	ORMDL3
m108	ENSG00000136114	THSD1
m108	ENSG00000257303	RP11-977G19.11
m108	ENSG00000011451	WIZ
m108	ENSG00000205531	NAP1L4
m108	ENSG00000130787	HIP1R
m108	ENSG00000259976	RP11-553L6.5
m108	ENSG00000128849	CGNL1
m108	ENSG00000121310	ECHDC2
m108	ENSG00000125871	C20orf72
m108	ENSG00000146409	SLC18B1
m108	ENSG00000253305	PCDHGB6
m108	ENSG00000135097	MSI1
m108	ENSG00000110090	CPT1A
m108	ENSG00000151332	MBIP
m108	ENSG00000160200	CBS
m108	ENSG00000181722	ZBTB20
m108	ENSG00000112304	ACOT13
m108	ENSG00000056487	PHF21B
m108	ENSG00000115266	APC2
m108	ENSG00000177133	RP1-163G9.1
m108	ENSG00000140022	STON2
m108	ENSG00000105323	HNRNPUL1
m108	ENSG00000186153	WWOX
m108	ENSG00000177854	TMEM187
m108	ENSG00000149634	SPATA25
m108	ENSG00000079691	LRRC16A
m108	ENSG00000064655	EYA2
m108	ENSG00000143416	SELENBP1
m108	ENSG00000212907	MT-ND4L
m108	ENSG00000184232	OAF
m108	ENSG00000132793	LPIN3
m108	ENSG00000163346	PBXIP1
m108	ENSG00000234456	MAGI2-AS3
m108	ENSG00000119943	PYROXD2
m108	ENSG00000101400	SNTA1
m108	ENSG00000178685	PARP10
m108	ENSG00000261934	PCDHGA9
m108	ENSG00000263146	RP11-849I19.1
m108	ENSG00000169515	CCDC8
m108	ENSG00000110651	CD81
m108	ENSG00000130304	SLC27A1
m108	ENSG00000166033	HTRA1
m108	ENSG00000166682	TMPRSS5
m108	ENSG00000144485	HES6
m108	ENSG00000115649	CNPPD1
m108	ENSG00000182902	SLC25A18
m108	ENSG00000091656	ZFHX4
m108	ENSG00000134376	CRB1
m108	ENSG00000141485	SLC13A5
m108	ENSG00000227500	SCAMP4
m108	ENSG00000255129	RP11-839D17.3
m108	ENSG00000072952	MRVI1
m108	ENSG00000142039	CCDC97
m108	ENSG00000198804	MT-CO1
m108	ENSG00000182218	HHIPL1
m108	ENSG00000068078	FGFR3
m108	ENSG00000166689	PLEKHA7
m108	ENSG00000162390	ACOT11
m108	ENSG00000163083	INHBB
m108	ENSG00000130055	GDPD2
m108	ENSG00000103852	TTC23
m108	ENSG00000225792	AC004540.4
m108	ENSG00000204347	BTBD17
m108	ENSG00000178952	TUFM
m108	ENSG00000160678	S100A1
m108	ENSG00000187266	EPOR
m108	ENSG00000198483	ANKRD35
m108	ENSG00000267106	CTD-3116E22.4
m108	ENSG00000258655	ARHGAP5-AS1
m108	ENSG00000138231	DBR1
m108	ENSG00000166813	KIF7
m108	ENSG00000186283	TOR3A
m108	ENSG00000166123	GPT2
m108	ENSG00000143373	ZNF687
m108	ENSG00000149930	TAOK2
m108	ENSG00000076248	UNG
m108	ENSG00000161714	PLCD3
m108	ENSG00000109118	PHF12
m108	ENSG00000134569	LRP4
m108	ENSG00000149577	SIDT2
m108	ENSG00000131748	STARD3
m108	ENSG00000186205	MARC1
m108	ENSG00000110693	SOX6
m108	ENSG00000161509	GRIN2C
m108	ENSG00000183762	KREMEN1
m108	ENSG00000127472	PLA2G5
m108	ENSG00000142611	PRDM16
m108	ENSG00000186998	EMID1
m108	ENSG00000101493	ZNF516
m108	ENSG00000162496	DHRS3
m108	ENSG00000118418	HMGN3
m108	ENSG00000102230	PCYT1B
m108	ENSG00000163879	DNALI1
m108	ENSG00000166548	TK2
m108	ENSG00000163386	NBPF10
m108	ENSG00000177303	CASKIN2
m108	ENSG00000107104	KANK1
m108	ENSG00000095319	NUP188
m108	ENSG00000213977	TAX1BP3
m108	ENSG00000106628	POLD2
m108	ENSG00000174374	WBSCR16
m108	ENSG00000140455	USP3
m108	ENSG00000166444	ST5
m108	ENSG00000109066	TMEM104
m108	ENSG00000124145	SDC4
m108	ENSG00000128602	SMO
m108	ENSG00000124098	FAM210B
m108	ENSG00000175287	PHYHD1
m108	ENSG00000214353	RP11-394B2.4
m108	ENSG00000117289	TXNIP
m108	ENSG00000205683	DPF3
m108	ENSG00000168309	FAM107A
m108	ENSG00000079337	RAPGEF3
m108	ENSG00000112576	CCND3
m108	ENSG00000163288	GABRB1
m108	ENSG00000204084	INPP5B
m108	ENSG00000172201	ID4
m108	ENSG00000231889	TRAF3IP2-AS1
m108	ENSG00000124440	HIF3A
m108	ENSG00000004799	PDK4
m108	ENSG00000149357	LAMTOR1
m108	ENSG00000145555	MYO10
m108	ENSG00000100767	PAPLN
m108	ENSG00000119927	GPAM
m108	ENSG00000105612	DNASE2
m108	ENSG00000099203	TMED1
m108	ENSG00000101605	MYOM1
m108	ENSG00000120253	NUP43
m108	ENSG00000196422	PPP1R26
m108	ENSG00000144579	CTDSP1
m108	ENSG00000136379	FAM108C1
m108	ENSG00000188039	NWD1
m108	ENSG00000177728	KIAA0195
m108	ENSG00000164089	AGXT2L1
m108	ENSG00000102882	MAPK3
m108	ENSG00000143171	RXRG
m108	ENSG00000196091	MYBPC1
m108	ENSG00000132164	SLC6A11
m108	ENSG00000144040	SFXN5
m108	ENSG00000135838	NPL
m108	ENSG00000170370	EMX2
m108	ENSG00000138639	ARHGAP24
m108	ENSG00000181873	IBA57
m108	ENSG00000099984	GSTT2
m108	ENSG00000171517	LPAR3
m108	ENSG00000186815	TPCN1
m108	ENSG00000172428	MYEOV2
m108	ENSG00000129151	BBOX1
m108	ENSG00000234899	FLJ37644
m108	ENSG00000178537	SLC25A20
m108	ENSG00000130203	APOE
m108	ENSG00000166839	ANKDD1A
m108	ENSG00000134508	CABLES1
m108	ENSG00000167291	TBC1D16
m108	ENSG00000139352	ASCL1
m108	ENSG00000100979	PLTP
m108	ENSG00000130413	STK33
m108	ENSG00000150281	CTF1
m108	ENSG00000107882	SUFU
m108	ENSG00000007372	PAX6
m108	ENSG00000121742	GJB6
m108	ENSG00000197417	SHPK
m108	ENSG00000144908	ALDH1L1
m108	ENSG00000241732	RP11-38P22.2
m108	ENSG00000154930	ACSS1
m108	ENSG00000248508	RP11-521C20.4
m108	ENSG00000167701	GPT
m108	ENSG00000103319	EEF2K
m108	ENSG00000074855	ANO8
m108	ENSG00000100154	TTC28
m108	ENSG00000204439	C6orf47
m108	ENSG00000132692	BCAN
m108	ENSG00000106538	RARRES2
m108	ENSG00000117592	PRDX6
m108	ENSG00000162738	VANGL2
m108	ENSG00000224272	AC114730.3
m108	ENSG00000081320	STK17B
m108	ENSG00000143458	GABPB2
m108	ENSG00000143919	CAMKMT
m108	ENSG00000016391	CHDH
m108	ENSG00000213366	GSTM2
m108	ENSG00000170175	CHRNB1
m108	ENSG00000215271	HOMEZ
m108	ENSG00000114790	ARHGEF26
m108	ENSG00000122378	FAM213A
m108	ENSG00000134716	CYP2J2
m108	ENSG00000223547	ZNF844
m108	ENSG00000000003	TSPAN6
m108	ENSG00000162430	SEPN1
m108	ENSG00000267169	CTB-55O6.12
m108	ENSG00000125637	PSD4
m108	ENSG00000246022	ALDH1L1-AS2
m108	ENSG00000148143	ZNF462
m108	ENSG00000187650	VMAC
m108	ENSG00000162736	NCSTN
m108	ENSG00000104205	SGK3
m108	ENSG00000228223	HCG11
m108	ENSG00000236618	PITPNA-AS1
m108	ENSG00000180769	WDFY3-AS2
m108	ENSG00000136205	TNS3
m108	ENSG00000079482	OPHN1
m108	ENSG00000162174	ASRGL1
m108	ENSG00000172458	IL17D
m108	ENSG00000111907	TPD52L1
m108	ENSG00000130876	SLC7A10
m108	ENSG00000162599	NFIA
m108	ENSG00000112312	GMNN
m108	ENSG00000172819	RARG
m108	ENSG00000137936	BCAR3
m108	ENSG00000254427	RP11-430H10.1
m108	ENSG00000256683	ZNF350
m108	ENSG00000125398	SOX9
m108	ENSG00000101004	NINL
m108	ENSG00000196218	RYR1
m108	ENSG00000267128	RNF157-AS1
m108	ENSG00000174903	RAB1B
m108	ENSG00000169105	CHST14
m108	ENSG00000143819	EPHX1
m108	ENSG00000093010	COMT
m108	ENSG00000139132	FGD4
m108	ENSG00000164199	GPR98
m108	ENSG00000261701	HPR
m108	ENSG00000166925	TSC22D4
m108	ENSG00000215067	AC027763.2
m108	ENSG00000178209	PLEC
m109	ENSG00000227097	RP11-742N3.1
m109	ENSG00000133195	SLC39A11
m109	ENSG00000135547	HEY2
m109	ENSG00000173473	SMARCC1
m109	ENSG00000173914	RBM4B
m109	ENSG00000006114	SYNRG
m109	ENSG00000128915	NARG2
m109	ENSG00000261195	CTD-2380F24.1
m109	ENSG00000100802	C14orf93
m109	ENSG00000143409	FAM63A
m109	ENSG00000197226	TBC1D9B
m109	ENSG00000153048	CARHSP1
m109	ENSG00000111181	SLC6A12
m109	ENSG00000146966	DENND2A
m109	ENSG00000121851	POLR3GL
m109	ENSG00000152284	TCF7L1
m109	ENSG00000164050	PLXNB1
m109	ENSG00000198732	SMOC1
m109	ENSG00000181090	EHMT1
m109	ENSG00000106012	IQCE
m109	ENSG00000049540	ELN
m109	ENSG00000166164	BRD7
m109	ENSG00000176533	GNG7
m109	ENSG00000198786	MT-ND5
m109	ENSG00000133065	SLC41A1
m109	ENSG00000104517	UBR5
m109	ENSG00000188786	MTF1
m109	ENSG00000197093	GAL3ST4
m109	ENSG00000130821	SLC6A8
m109	ENSG00000117280	RAB7L1
m109	ENSG00000135482	ZC3H10
m109	ENSG00000051128	HOMER3
m109	ENSG00000162994	CLHC1
m109	ENSG00000255389	C6orf3
m109	ENSG00000168763	CNNM3
m109	ENSG00000103168	TAF1C
m109	ENSG00000134186	PRPF38B
m109	ENSG00000113300	CNOT6
m109	ENSG00000140265	ZSCAN29
m109	ENSG00000047644	WWC3
m109	ENSG00000166529	ZSCAN21
m109	ENSG00000183955	SETD8
m109	ENSG00000140682	TGFB1I1
m109	ENSG00000130703	OSBPL2
m109	ENSG00000108828	VAT1
m109	ENSG00000076201	PTPN23
m109	ENSG00000164403	SHROOM1
m109	ENSG00000125875	TBC1D20
m109	ENSG00000182544	MFSD5
m109	ENSG00000162433	AK4
m109	ENSG00000143375	CGN
m109	ENSG00000160685	ZBTB7B
m109	ENSG00000160208	RRP1B
m109	ENSG00000204120	GIGYF2
m109	ENSG00000184304	PRKD1
m109	ENSG00000168395	ING5
m109	ENSG00000161791	FMNL3
m109	ENSG00000070047	PHRF1
m109	ENSG00000149639	SOGA1
m109	ENSG00000126785	RHOJ
m109	ENSG00000245060	CTC-205M6.2
m109	ENSG00000074964	ARHGEF10L
m109	ENSG00000042062	FAM65C
m109	ENSG00000100099	HPS4
m109	ENSG00000172086	KRCC1
m109	ENSG00000145423	SFRP2
m109	ENSG00000183172	C22orf32
m109	ENSG00000053254	FOXN3
m109	ENSG00000166535	A2ML1
m109	ENSG00000119403	PHF19
m109	ENSG00000171858	RPS21
m109	ENSG00000157933	SKI
m109	ENSG00000165406	MARCH8
m109	ENSG00000092931	MFSD11
m109	ENSG00000100796	SMEK1
m109	ENSG00000186001	LRCH3
m109	ENSG00000108055	SMC3
m109	ENSG00000105698	USF2
m109	ENSG00000159176	CSRP1
m109	ENSG00000196968	FUT11
m109	ENSG00000115282	TTC31
m109	ENSG00000162600	OMA1
m109	ENSG00000165934	CPSF2
m109	ENSG00000146733	PSPH
m109	ENSG00000112280	COL9A1
m109	ENSG00000241015	TPM3P9
m109	ENSG00000071564	TCF3
m109	ENSG00000171388	APLN
m109	ENSG00000163132	MSX1
m109	ENSG00000102547	CAB39L
m109	ENSG00000147421	HMBOX1
m109	ENSG00000119487	MAPKAP1
m109	ENSG00000130699	TAF4
m109	ENSG00000197146	AL133458.1
m109	ENSG00000088247	KHSRP
m109	ENSG00000205476	CCDC85C
m109	ENSG00000260766	RP11-226L15.5
m109	ENSG00000010310	GIPR
m109	ENSG00000170276	HSPB2
m109	ENSG00000171552	BCL2L1
m109	ENSG00000185551	NR2F2
[truncated: 11,189 more rows]
