# Supplementary material for: The Molecular and Neuropathological Consequences of Genetic Risk for Alzheimer's Dementia
Source: PubMed Central journal article supplement (PMC6187226; doi:10.3389/fnins.2018.00699), 2018-10-08
Supplement: Table_1.pdf [file Table_1.pdf]

|                                      | <b>Overall</b> | <b>DNAm</b>  | <b>H3K9Ac</b> | <b>mRNA</b>  | <b>miRNA</b> | <b>Protein</b> |
|--------------------------------------|----------------|--------------|---------------|--------------|--------------|----------------|
| <b>N</b>                             | 1272           | 651          | 631           | 494          | 655          | 765            |
| Female (n, %)                        | 847 (66.6)     | 408 (62.7)   | 414 (65.6)    | 307 (62.1)   | 417 (63.7)   | 502 (65.6)     |
| Clinical dementia (n, %)             | 554 (43.6)     | 289 (44.4)   | 281 (44.5)    | 203 (41.1)   | 290 (44.3)   | 343 (44.8)     |
| NCI/MCI (n, %)                       | 690 (54.2)     | 350 (53.8)   | 339 (53.7)    | 282 (57.1)   | 353 (53.9)   | 411 (53.7)     |
| AD (n, %)                            | 471 (37.0)     | 233 (35.8)   | 226 (35.8)    | 168 (34.0)   | 236 (36.0)   | 283 (37.0)     |
| Presence of gross infarctions (n, %) | 458 (36.0)     | 232 (35.6)   | 225 (35.7)    | 174 (35.2)   | 239 (36.5)   | 277 (36.2)     |
| Presence of microinfarcts (n, %)     | 377 (29.6)     | 175 (26.9)   | 170 (26.9)    | 127 (25.7)   | 178 (27.2)   | 216 (28.2)     |
| Presence of Lewy bodies (n, %)       | 282 (22.2)     | 127 (19.5)   | 127 (20.1)    | 90 (18.2)    | 132 (20.2)   | 171 (22.4)     |
| Age at death (mean (sd))             | 89.34 (6.56)   | 88.25 (6.63) | 88.29 (6.51)  | 88.43 (6.63) | 88.26 (6.53) | 88.76 (6.42)   |
| Years of education (mean, sd)        | 16.35 (3.60)   | 16.48 (3.52) | 16.35 (3.52)  | 16.47 (3.47) | 16.39 (3.56) | 16.29 (3.51)   |
| MMSE, last visit (mean, sd)          | 20.62 (9.40)   | 20.93 (9.14) | 20.92 (9.19)  | 21.64 (8.84) | 20.86 (9.33) | 20.61 (9.33)   |
| Global AD pathology (mean, sd)       | 0.74 (0.63)    | 0.70 (0.62)  | 0.71 (0.62)   | 0.66 (0.60)  | 0.71 (0.63)  | 0.73 (0.64)    |
| Amyloid score (mean, sd)             | 4.16 (4.11)    | 3.49 (3.76)  | 3.61 (3.80)   | 3.54 (3.76)  | 3.56 (3.76)  | 4.42 (4.52)    |
| Tangles score (mean, sd)             | 7.16 (8.67)    | 6.40 (8.08)  | 6.55 (8.24)   | 6.06 (7.67)  | 6.51 (8.15)  | 6.31 (7.54)    |

Supplementary Table 1. Cohort demographics.
